# Supplementary material for: Exploring the impact of abnormal coordination in macrocyclic N-heterocyclic carbene ligands on bio-inspired iron epoxidation catalysis
Source: Royal Society of Chemistry journal article supplement (doi:10.1039/d4cy00992d), 2024-01-01
Supplement: d4cy00992d1.pdf [file d4cy00992d1.pdf]

## Supporting Information (SI)

# Exploring the impact of abnormal coordination in macrocyclic *N*-heterocyclic carbene ligands on bio-inspired iron epoxidation catalysis

Greta G. Zámbo<sup>a</sup>, Carla A. Esslinger<sup>a</sup>, Michael J. Sauer<sup>a</sup>, Isabelle Rüter<sup>b</sup>, Robert M. Reich<sup>a</sup>, Serhiy Demeshko<sup>b</sup>, Franc Meyer<sup>b</sup> and Fritz E. Kühn<sup>a,\*</sup>

<sup>a</sup>Technical University of Munich, School of Natural Sciences, Department of Chemistry and Catalysis Research Center, Molecular Catalysis, Lichtenbergstraße 4, 85748 Garching bei München, Germany. E-mail: fritz.kuehn@ch.tum.de; Tel. +49 (0)89 289 13477; Fax: +49 (0)89 289 13247

<sup>b</sup>Georg-August-Universität Göttingen, Institut für Anorganische Chemie, Tammannstraße 4, 37077 Göttingen, Germany.

[\*] Corresponding author

### Table of Contents

|                                                                      |    |
|----------------------------------------------------------------------|----|
| 1. NMR-Spectra .....                                                 | 2  |
| 2. Single crystal X-ray diffraction .....                            | 3  |
| 3. Buried volume and topographic steric map calculations .....       | 6  |
| 4. Thermochromism .....                                              | 15 |
| 5. Magnetic susceptibility .....                                     | 16 |
| 6. HR-ESI-MS.....                                                    | 17 |
| 7. <sup>1</sup> H-NMR spectra of catalytic substance screening ..... | 18 |
| 8. DFT calculations.....                                             | 26 |
| 9. References.....                                                   | 50 |

# 1. NMR-Spectra

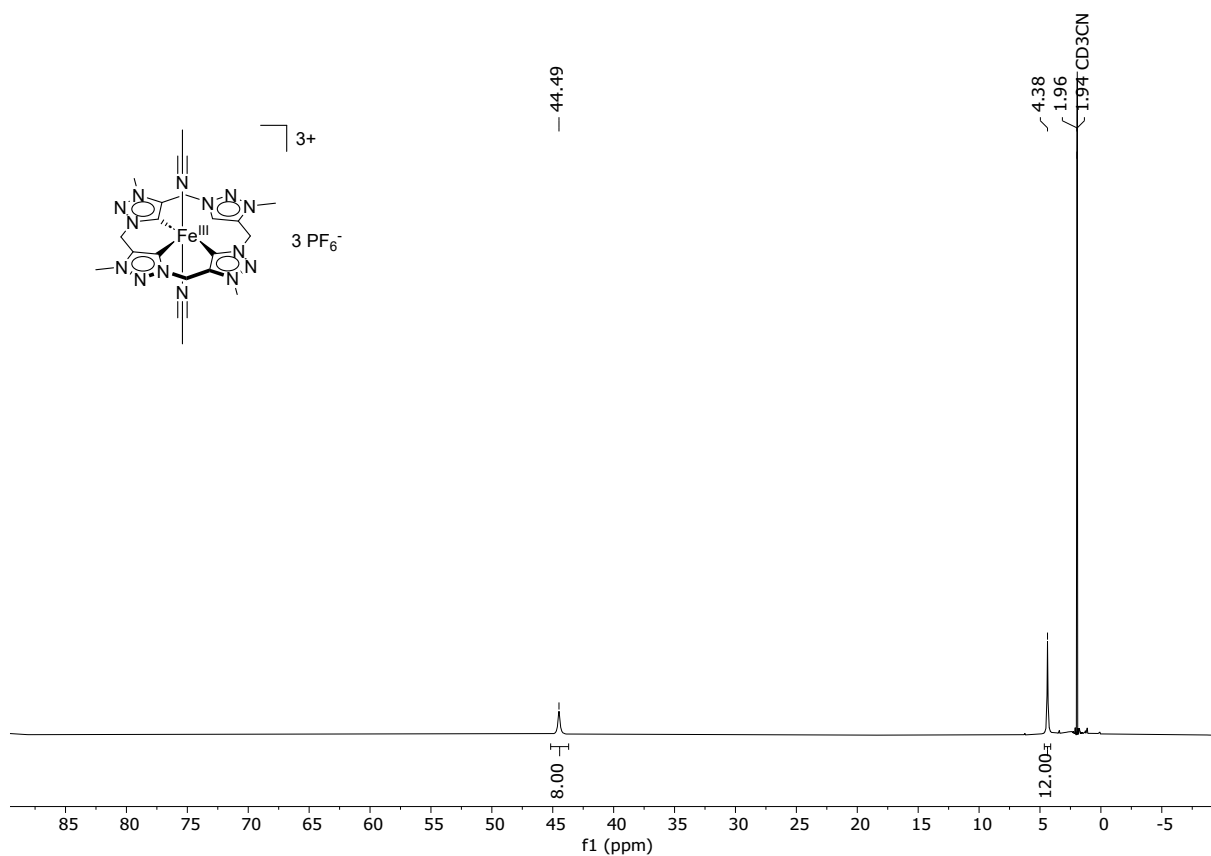

Fig. S1  $^1\text{H-NMR}$  spectrum of **2** in  $\text{CD}_3\text{CN}$ .

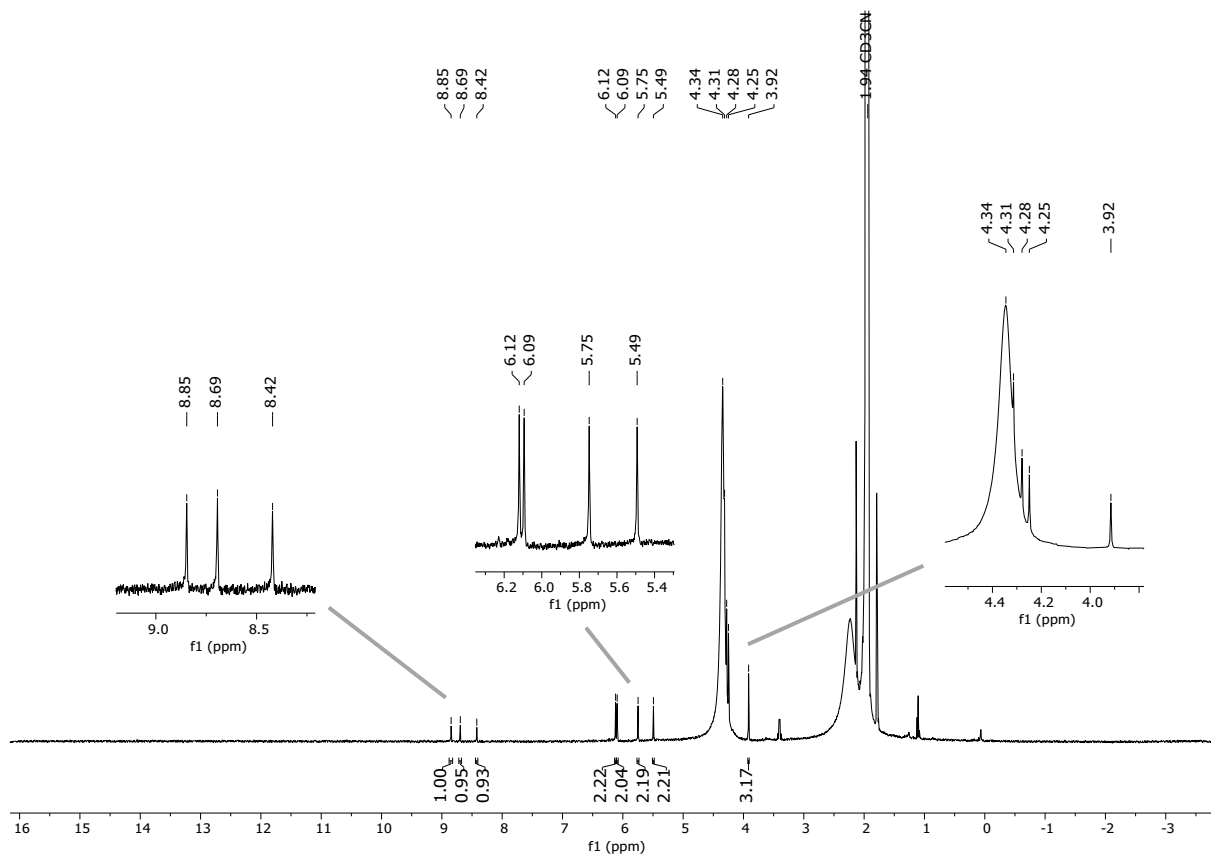

**Fig. S2**  $^1\text{H-NMR}$  spectrum of the reaction of **2** with 10.0 eq.  $\text{H}_2\text{O}_2$  (50% aq.) after 21 h under argon in dry and degassed  $\text{CD}_3\text{CN}$ .

## 2. Single crystal X-ray diffraction

X-ray crystallographic data was collected on a Bruker D8 Venture single crystal X-ray diffractometer with the following setup: A CMOS detector (Bruker Photon-100), a Mo IMS microsource and a Helios optic using the APEX3 software package.<sup>1</sup> The measurement used  $\text{MoK}_\alpha$  radiation ( $\lambda = 0.71073 \text{ \AA}$ ) and was performed on a single crystal coated with perfluorinated ether. The crystal was fixed on top of a micromount sample holder and frozen under a stream of cold nitrogen at 100 K. A matrix scan was used to determine the initial lattice parameters. Reflections were corrected for Lorentz and polarisation effects, scan speed, and background using SAINT.<sup>2</sup> Absorption corrections, including odd and even ordered spherical harmonics were performed using SADABS.<sup>3</sup> Space group assignment was based upon systematic absences, E statistics, and successful refinement of the structure. The structure was solved by direct methods (SHELXT) with the aid of successive difference Fourier maps, and was refined against all data using SHELXL-2015 in conjunction with SHELXLE.<sup>4-6</sup> Hydrogen atoms were calculated in ideal positions as follows: Methyl hydrogen atoms were refined as part of rigid rotating groups, with a C–H distance of  $0.98 \text{ \AA}$  and  $U_{\text{iso}}(\text{H}) = 1.5 \cdot U_{\text{eq}}(\text{C})$ . Other H atoms were placed in calculated positions and refined using a riding model, with methylene and aromatic C–H distances of  $0.99 \text{ \AA}$  and  $0.95 \text{ \AA}$ , respectively, other C–H distances of  $1.00 \text{ \AA}$  and  $U_{\text{iso}}(\text{H}) = 1.2 \cdot U_{\text{eq}}(\text{C})$ . Non-hydrogen atoms were refined with anisotropic displacement parameters. Full-matrix least-squares refinements were carried out by minimizing  $\sum w(\text{Fo}_2 - \text{Fc}_2)^2$  with SHELXL weighting scheme. Neutral atom scattering factors for all atoms and anomalous dispersion corrections for the non-hydrogen atoms were taken from *International Tables for Crystallography*.<sup>7</sup> The image of the crystal structure was generated with Mercury<sup>8</sup> or Platon<sup>9</sup>. CCDC (2362784) contain the supplementary crystallographic data for this paper. This data can be obtained free of charge *via* [www.ccdc.cam.ac.uk/data\\_request/cif](http://www.ccdc.cam.ac.uk/data_request/cif), or by emailing [data\\_request@ccdc.cam.ac.uk](mailto:data_request@ccdc.cam.ac.uk), or by contacting The Cambridge Crystallographic Data Centre, 12 Union Road, Cambridge CB2 1EZ, UK; fax: +44 1223 336033.

A block-like specimen of complex **2**, approximate dimensions 0.034 mm x 0.144 mm x 0.163 mm, was used for the X-ray crystallographic analysis. The X-ray intensity data were measured on a Bruker D8 Venture system equipped with a Helios optic monochromator and a Mo TXS rotating anode ( $\lambda = 0.71073 \text{ \AA}$ ).

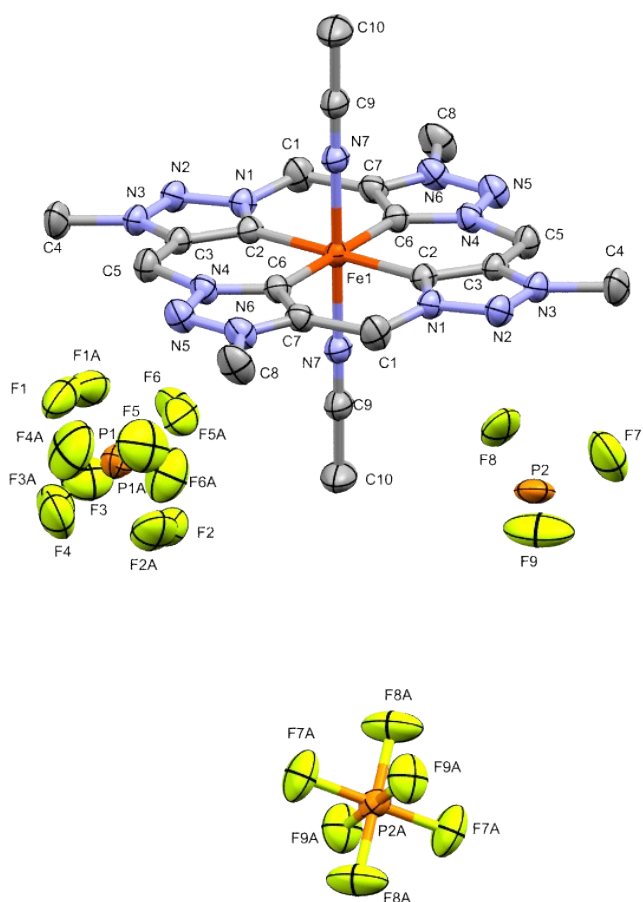

**Fig. S3** ORTEP-style representation of iron(III) calix[4]3-methyl-1,2,3-triazol-5-ylidene hexafluorophosphate **2**. Hydrogen atoms are omitted for clarity and thermal ellipsoids are shown at 30% probability level.

**Table S1.** Crystallographic data and structure refinement parameters of complex **2**.

| Sample and Crystal Data                  |                                                                                                                                                                |                                                                            |
|------------------------------------------|----------------------------------------------------------------------------------------------------------------------------------------------------------------|----------------------------------------------------------------------------|
| Identification code                      | ZamGr5                                                                                                                                                         |                                                                            |
| CCDCnumber                               | 2362784                                                                                                                                                        |                                                                            |
| Chemical formula                         | $C_{20}H_{26}F_{18}FeN_{14}P_3$                                                                                                                                |                                                                            |
| Formula weight                           | 953.31 g/mol                                                                                                                                                   |                                                                            |
| Temperature                              | 297(2) K                                                                                                                                                       |                                                                            |
| Wavelength                               | 0.71073 Å                                                                                                                                                      |                                                                            |
| Crystal size                             | 0.034 x 0.144 x 0.163 mm                                                                                                                                       |                                                                            |
| Crystal habit                            | yellow block                                                                                                                                                   |                                                                            |
| Crystal System                           | monoclinic                                                                                                                                                     |                                                                            |
| Space group                              | P 1 21/c 1                                                                                                                                                     |                                                                            |
| Unit cell dimensions                     | a = 9.2748(2) Å<br>b = 17.6660(5) Å<br>c = 11.4201(3) Å                                                                                                        | $\alpha = 90^\circ$<br>$\beta = 104.1930(10)^\circ$<br>$\gamma = 90^\circ$ |
| Volume                                   | 1814.05(8) Å <sup>3</sup>                                                                                                                                      |                                                                            |
| Z                                        | 2                                                                                                                                                              |                                                                            |
| Density (calculated)                     | 1.745g/cm <sup>3</sup>                                                                                                                                         |                                                                            |
| Absorption coefficient                   | 0.680 mm <sup>-1</sup>                                                                                                                                         |                                                                            |
| F(000)                                   | 954                                                                                                                                                            |                                                                            |
| Data Collection and Structure Refinement |                                                                                                                                                                |                                                                            |
| Diffractometer                           | Bruker D8 Venture                                                                                                                                              |                                                                            |
| Radiation Source                         | IMS microsource, Mo                                                                                                                                            |                                                                            |
| Theta range for data collection          | 2.31 to 25.72°                                                                                                                                                 |                                                                            |
| Index ranges                             | 11<=h<=11, -21<=k<=21, -13<=l<=13                                                                                                                              |                                                                            |
| Reflections collected                    | 67359                                                                                                                                                          |                                                                            |
| Independent reflections                  | 3447 [R(int) = 0.0691]                                                                                                                                         |                                                                            |
| Coverage of independent reflections      | 99.6%                                                                                                                                                          |                                                                            |
| Absorption correction                    |                                                                                                                                                                |                                                                            |
| Max. and min. transmission               | 0.9770 and 0.8970                                                                                                                                              |                                                                            |
| Structure solution technique             | direct methods                                                                                                                                                 |                                                                            |
| Structure solution program               | SHELXT 2018/2 (Sheldrick, 2018)                                                                                                                                |                                                                            |
| Function minimised                       | $\sum w(F_o^2 - F_c^2)^2$                                                                                                                                      |                                                                            |
| Refinement method                        | Full-matrix least-squares on F <sup>2</sup>                                                                                                                    |                                                                            |
| Refinement program                       | SHELXL-2018/3 (Sheldrick, 2018)                                                                                                                                |                                                                            |
| Data / restraints / parameters           | 3447 / 393 / 357                                                                                                                                               |                                                                            |
| Goodness-of-fit on F2                    | 1.043                                                                                                                                                          |                                                                            |
| Final R indices                          | 2868 data; I>2σ(I)                                                                                                                                             | R1 = 0.0405, wR2 = 0.1082                                                  |
|                                          | all data                                                                                                                                                       | R1 = 0.0499, wR2 = 0.1165                                                  |
| Weighting scheme                         | w=1/[σ <sup>2</sup> (F <sub>o</sub> <sup>2</sup> )+( 0.0539P) <sup>2</sup> +1.1803P]<br>where P=(F <sub>o</sub> <sup>2</sup> +2F <sub>c</sub> <sup>2</sup> )/3 |                                                                            |
| Largest diff. max. min.                  | 0.374 and -0.205 eÅ <sup>-3</sup>                                                                                                                              |                                                                            |
| R.M.S. deviation from mean               | 0.045 eÅ <sup>-3</sup>                                                                                                                                         |                                                                            |

### 3. Buried volume and topographic steric map calculations

The buried volume<sup>10</sup> and corresponding topographic maps<sup>11</sup> were determined for complexes **1**, **2**, **A** and **B** using *SambVca* 2.1<sup>12</sup>. The structure of the complexes was loaded using the respective .xyz files derived from the SC-XRD analysis. The iron atom was set as centre of the sphere (distance 0.00 Å).

a) For calculations with viewing direction on the top of the complex, *i.e.* axial MeCN ligand vertically facing towards the viewer and the complex ligand underneath: One N-atom of the two axial MeCN ligands was selected for the Z-negative z axis definition. One carbene C-atom of the ligand was selected for the xz-plane definition.

b) For calculations with viewing direction towards the complex ligand: One carbene C-atom of the ligand was selected for the Z-negative z axis definition. One N-atom of the two axial MeCN ligands was selected for the xz-plane definition.

The iron atom was selected to be deleted. The atomic radii were left on the pre-setting (bond radii scaled by 1.17). The sphere radius was left on pre-setting (3.5 Å). Distance of the coordination point from the centre of the sphere was set to 0.0 Å (pre-setting). Mesh spacing for numerical integration was set to 0.10 Å (pre-setting). H atoms were not included in the calculations (pre-setting).

Calculations regarding the percentage of buried volume %V<sub>Bur</sub> of the iron centre of the respective complex show a marginal difference between compounds **1** with 88%V<sub>Bur</sub>, **2** with 88%V<sub>Bur</sub>, **A** with 89%V<sub>Bur</sub> and **B** with 89%V<sub>Bur</sub> (Table S2-S5). In order to gain access to the active centre of the iron catalyst, at least one of the labile MeCN ligands must be replaced.<sup>13</sup> Removing the labile ligands decreases the buried volume to likewise 69 – 70%V<sub>Bur</sub> for all complexes **1**, **2**, **A** and **B**. The topographic steric maps of the buried volume visualise again the highly symmetrical arrangement of the aNHC ligand in **1** and **2** compared to the saddle-distorted conformation of the classic NHC ligand in **A** and **B** (see ESI, Fig. S5, S7, S9 and S11).

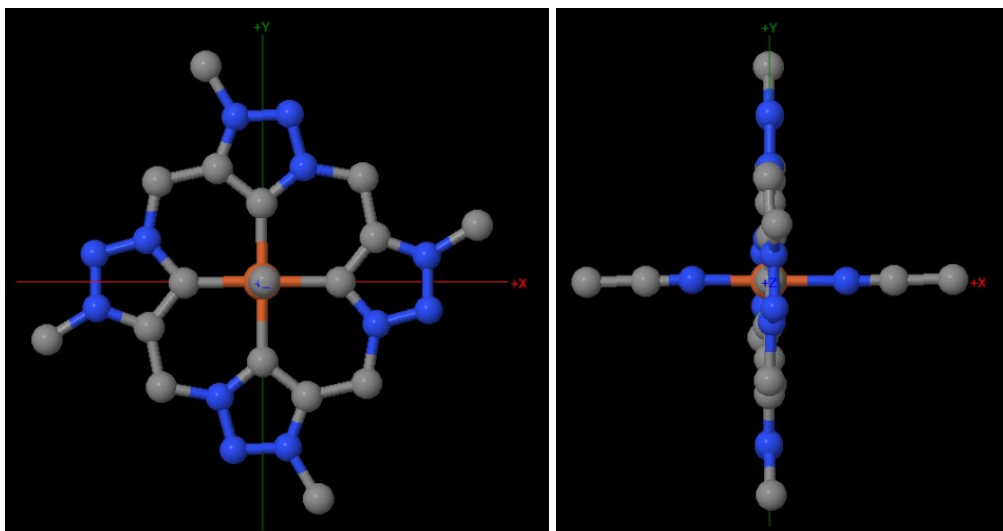

**Fig. S4** Visualization of complex **1** (*JSmol* window) and assignment of the x, y, z axes with view on top (left) and towards the NHC ligand (right).

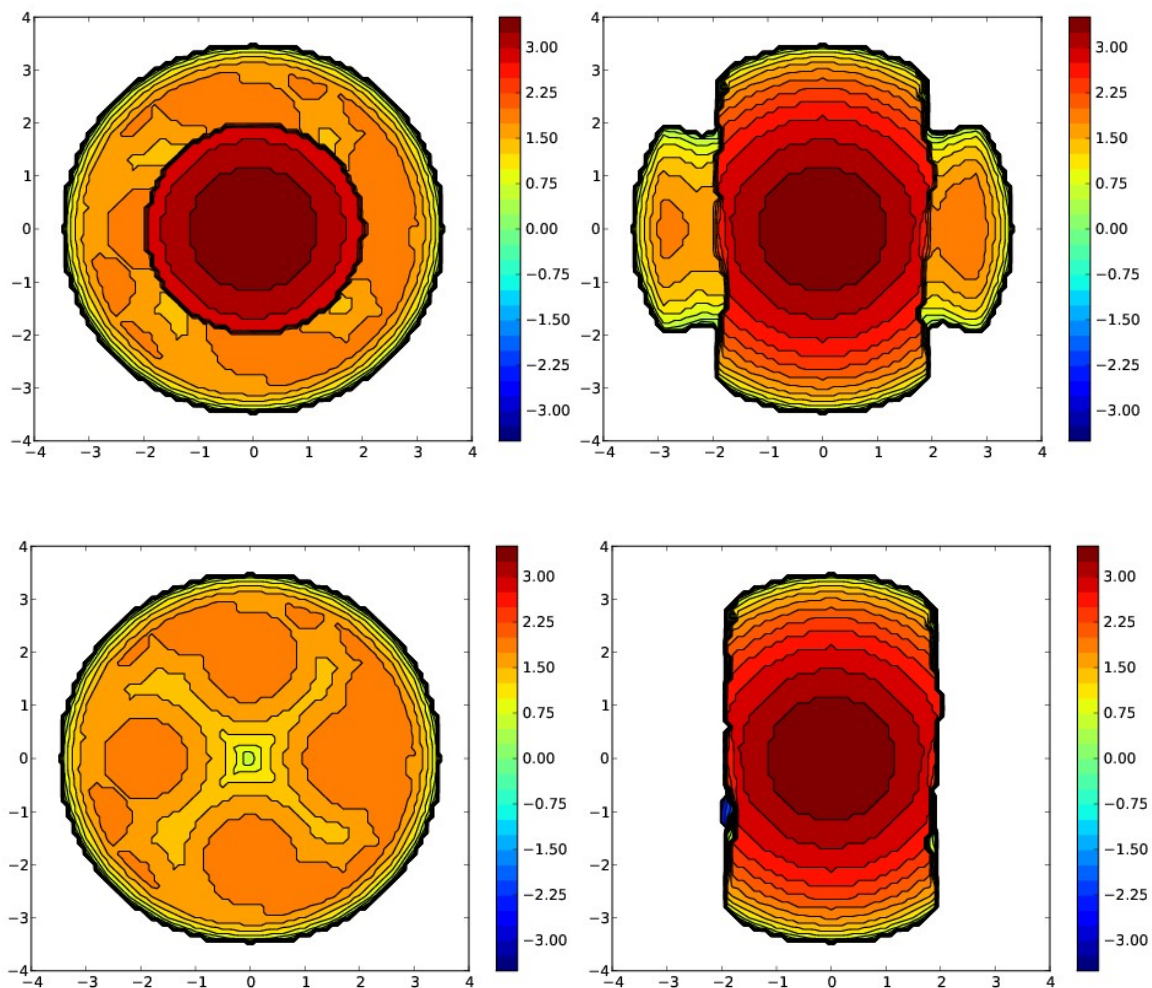

**Fig. S5** Topographic steric map of the buried volume of **1** with (top) and without (bottom) labile MeCN ligands with view on top (left) and towards the NHC ligand (right). The red and blue colours show the more- and less-hindered zones in the catalytic centre, respectively.

**Table S2** Calculated buried volume for **1**.

| Top view, with MeCN ligands |             |      |              |      |      |
|-----------------------------|-------------|------|--------------|------|------|
| %V Free                     | %V Buried   |      | % V Tot/V Ex |      |      |
| 11.9                        | <b>88.1</b> |      | 99.9         |      |      |
| Qua-<br>drant               | V f         | V b  | V t          | %V f | %V b |
| SW                          | 5.3         | 39.5 | 44.9         | 11.9 | 88.1 |
| NW                          | 5.3         | 39.5 | 44.9         | 11.9 | 88.1 |
| NE                          | 5.3         | 39.5 | 44.9         | 11.9 | 88.1 |
| SE                          | 5.3         | 39.5 | 44.9         | 11.9 | 88.1 |

| Side view, with MeCN ligands |             |      |              |      |      |
|------------------------------|-------------|------|--------------|------|------|
| %V Free                      | %V Buried   |      | % V Tot/V Ex |      |      |
| 12.0                         | <b>88.0</b> |      | 99.9         |      |      |
| Qua-<br>drant                | V f         | V b  | V t          | %V f | %V b |
| SW                           | 5.3         | 39.5 | 44.9         | 11.8 | 88.2 |
| NW                           | 5.4         | 39.4 | 44.9         | 12.1 | 87.9 |
| NE                           | 5.3         | 39.5 | 44.9         | 11.8 | 88.2 |
| SE                           | 5.4         | 39.4 | 44.9         | 12.1 | 87.9 |

| Top view, without MeCN ligands |             |      |              |      |      |
|--------------------------------|-------------|------|--------------|------|------|
| %V Free                        | %V Buried   |      | % V Tot/V Ex |      |      |
| 31.2                           | <b>68.8</b> |      | 99.9         |      |      |
| Qua-<br>drant                  | V f         | V b  | V t          | %V f | %V b |
| SW                             | 14.0        | 30.9 | 44.9         | 31.2 | 68.8 |
| NW                             | 14.0        | 30.9 | 44.9         | 31.2 | 68.8 |
| NE                             | 14.0        | 30.9 | 44.9         | 31.2 | 68.8 |
| SE                             | 14.0        | 30.9 | 44.9         | 31.2 | 68.8 |

| Side view, without MeCN ligands |             |      |              |      |      |
|---------------------------------|-------------|------|--------------|------|------|
| %V Free                         | %V Buried   |      | % V Tot/V Ex |      |      |
| 31.2                            | <b>68.8</b> |      | 99.9         |      |      |
| Qua-<br>drant                   | V f         | V b  | V t          | %V f | %V b |
| SW                              | 14.0        | 30.9 | 44.9         | 31.2 | 68.8 |
| NW                              | 14.0        | 30.8 | 44.9         | 31.3 | 68.7 |
| NE                              | 14.0        | 30.9 | 44.9         | 31.2 | 68.8 |
| SE                              | 14.0        | 30.8 | 44.9         | 31.3 | 68.7 |



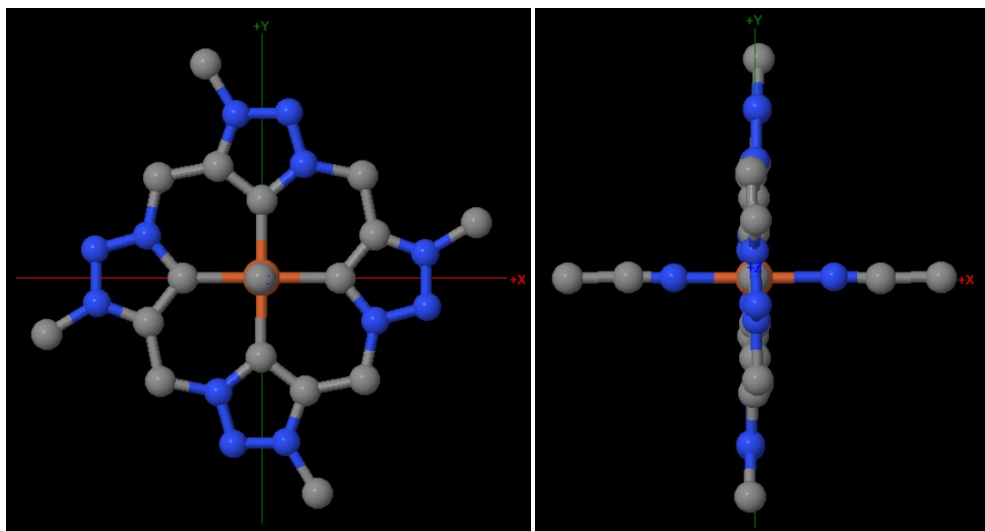

**Fig. S6** Visualization of complex **2** (*JSmol* window) and assignment of the x, y, z axes with view on top (left) and towards the NHC ligand (right).

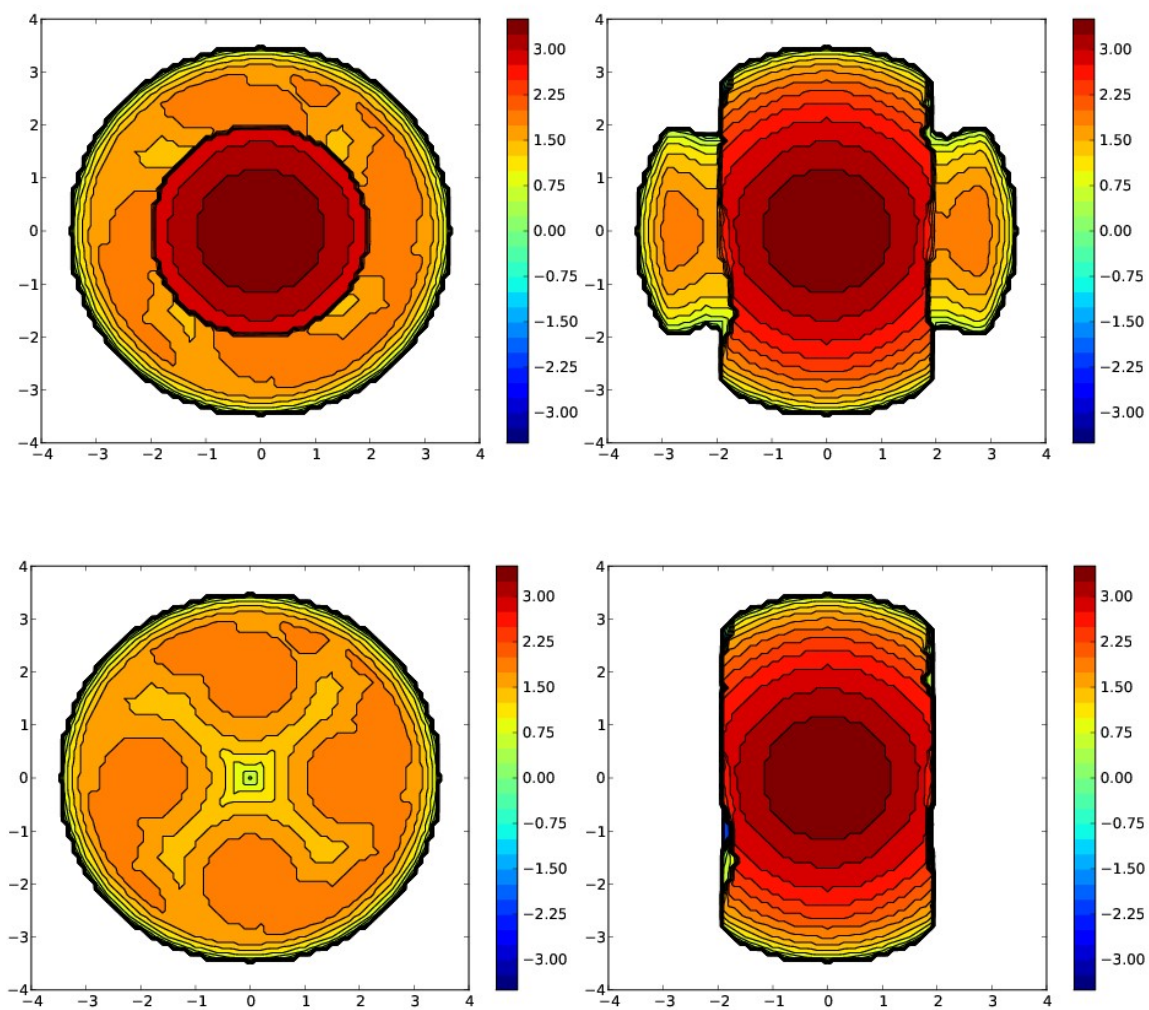

**Fig. S7** Topographic steric map of the buried volume of **2** with (top) and without (bottom) labile MeCN ligands with view on top (left) and towards the NHC ligand (right). The red and blue colours show the more- and less-hindered zones in the catalytic centre, respectively.

**Table S3** Calculated buried volume for 2.

| Top view, with MeCN ligands |             |      |              |      |      |
|-----------------------------|-------------|------|--------------|------|------|
| %V Free                     | %V Buried   |      | % V Tot/V Ex |      |      |
| 11.9                        | <b>88.1</b> |      | 99.9         |      |      |
| Qua-<br>drant               | V f         | V b  | V t          | %V f | %V b |
| SW                          | 5.3         | 39.6 | 44.9         | 11.8 | 88.2 |
| NW                          | 5.3         | 39.5 | 44.9         | 11.9 | 88.1 |
| NE                          | 5.3         | 39.6 | 44.9         | 11.8 | 88.2 |
| SE                          | 5.3         | 39.5 | 44.9         | 11.9 | 88.1 |

| Side view, with MeCN ligands |             |      |              |      |      |
|------------------------------|-------------|------|--------------|------|------|
| %V Free                      | %V Buried   |      | % V Tot/V Ex |      |      |
| 11.9                         | <b>88.1</b> |      | 99.9         |      |      |
| Qua-<br>drant                | V f         | V b  | V t          | %V f | %V b |
| SW                           | 5.5         | 39.4 | 44.9         | 12.2 | 87.8 |
| NW                           | 5.2         | 39.7 | 44.9         | 11.6 | 88.4 |
| NE                           | 5.5         | 39.4 | 44.9         | 12.2 | 87.8 |
| SE                           | 5.2         | 39.7 | 44.9         | 11.6 | 88.4 |

| Top view, without MeCN ligands |             |      |              |      |      |
|--------------------------------|-------------|------|--------------|------|------|
| %V Free                        | %V Buried   |      | % V Tot/V Ex |      |      |
| 31.3                           | <b>68.7</b> |      | 99.9         |      |      |
| Qua-<br>drant                  | V f         | V b  | V t          | %V f | %V b |
| SW                             | 14.0        | 30.8 | 44.9         | 31.3 | 68.7 |
| NW                             | 14.1        | 30.8 | 44.9         | 31.3 | 68.7 |
| NE                             | 14.0        | 30.8 | 44.9         | 31.3 | 68.7 |
| SE                             | 14.1        | 30.8 | 44.9         | 31.3 | 68.7 |

| Side view, without MeCN ligands |             |      |              |      |      |
|---------------------------------|-------------|------|--------------|------|------|
| %V Free                         | %V Buried   |      | % V Tot/V Ex |      |      |
| 31.3                            | <b>68.7</b> |      | 99.9         |      |      |
| Qua-<br>drant                   | V f         | V b  | V t          | %V f | %V b |
| SW                              | 14.2        | 30.7 | 44.9         | 31.6 | 68.4 |
| NW                              | 13.9        | 30.9 | 44.9         | 31.0 | 69.0 |
| NE                              | 14.2        | 30.7 | 44.9         | 31.6 | 68.4 |
| SE                              | 13.9        | 30.9 | 44.9         | 31.0 | 69.0 |

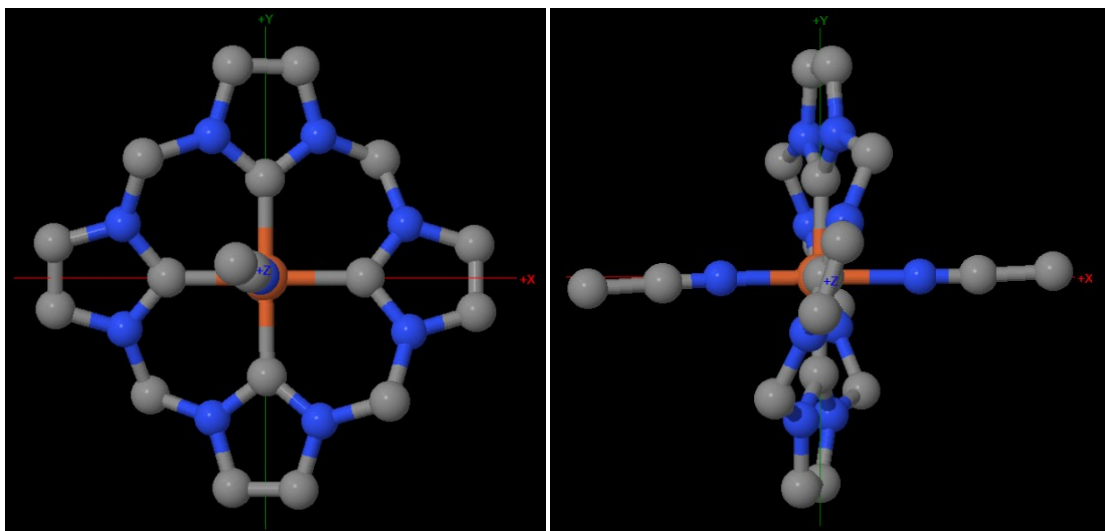

**Fig. S8** Visualization of complex **A** (*JSmol* window) and assignment of the *x*, *y*, *z* axes with view on top (left) and towards the NHC ligand (right).

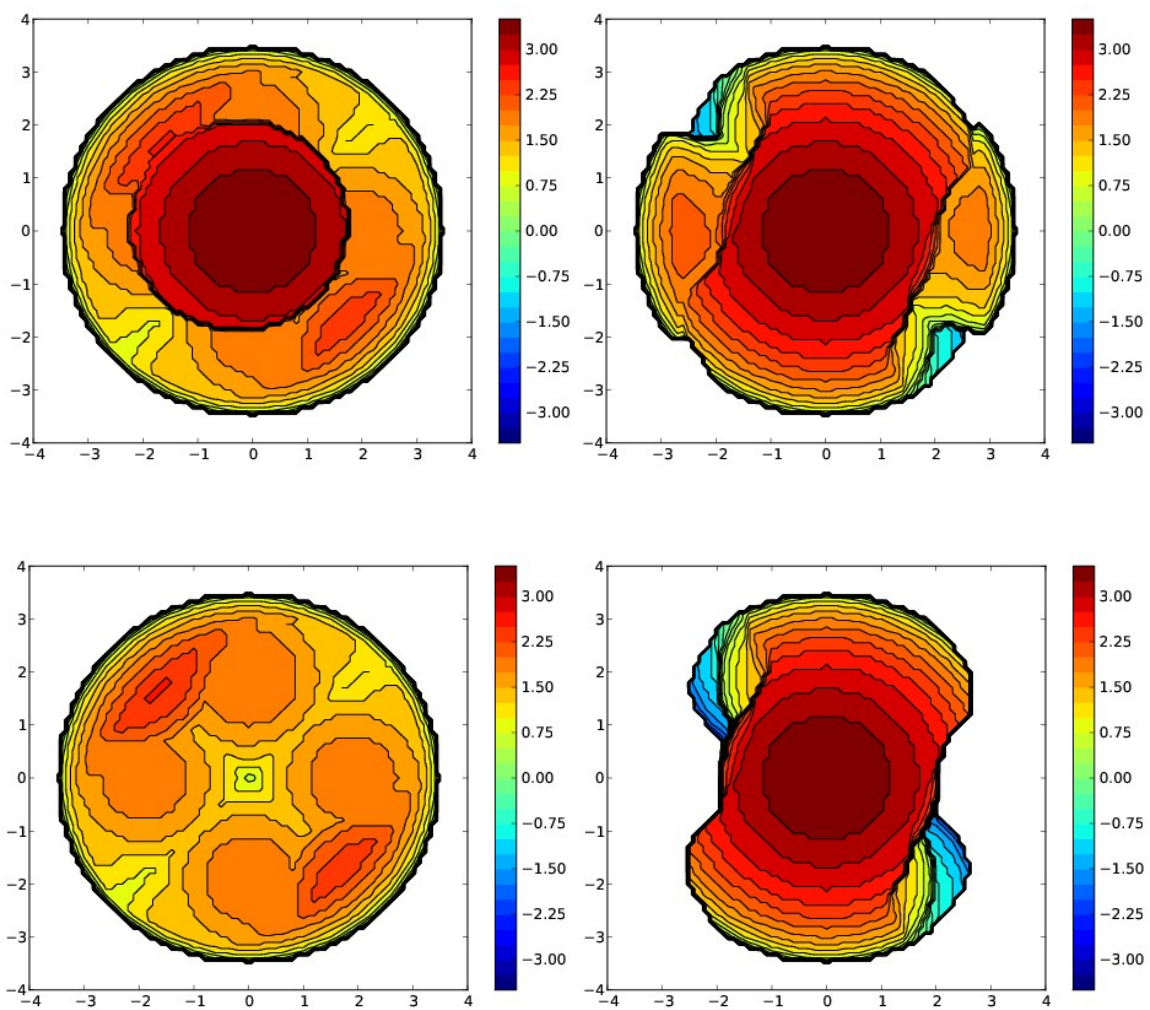

**Fig. S9** Topographic steric map of the buried volume of **A** with (top) and without (bottom) labile MeCN ligands with view on top (left) and towards the NHC ligand (right). The red and blue colours show the more- and less-hindered zones in the catalytic centre, respectively.

**Table S4** Calculated buried volume for A.

| Top view, with MeCN ligands |             |      |              |      |      |
|-----------------------------|-------------|------|--------------|------|------|
| %V Free                     | %V Buried   |      | % V Tot/V Ex |      |      |
| 10.9                        | <b>89.1</b> |      | 99.9         |      |      |
| Qua-<br>drant               | V f         | V b  | V t          | %V f | %V b |
| SW                          | 4.6         | 40.3 | 44.9         | 10.2 | 89.8 |
| NW                          | 4.4         | 40.5 | 44.9         | 9.8  | 90.2 |
| NE                          | 5.2         | 39.7 | 44.9         | 11.5 | 88.5 |
| SE                          | 5.5         | 39.4 | 44.9         | 12.2 | 87.8 |

| Side view, with MeCN ligands |             |      |              |      |      |
|------------------------------|-------------|------|--------------|------|------|
| %V Free                      | %V Buried   |      | % V Tot/V Ex |      |      |
| 10.9                         | <b>89.1</b> |      | 99.9         |      |      |
| Qua-<br>drant                | V f         | V b  | V t          | %V f | %V b |
| SW                           | 4.6         | 40.2 | 44.9         | 10.3 | 89.7 |
| NW                           | 5.7         | 39.1 | 44.9         | 12.8 | 87.2 |
| NE                           | 4.3         | 40.6 | 44.9         | 9.6  | 90.4 |
| SE                           | 5.0         | 39.9 | 44.9         | 11.1 | 88.9 |

| Top view, without MeCN ligands |             |      |              |      |      |
|--------------------------------|-------------|------|--------------|------|------|
| %V Free                        | %V Buried   |      | % V Tot/V Ex |      |      |
| 29.8                           | <b>70.2</b> |      | 99.9         |      |      |
| Qua-<br>drant                  | V f         | V b  | V t          | %V f | %V b |
| SW                             | 13.3        | 31.5 | 44.9         | 29.7 | 70.3 |
| NW                             | 13.3        | 31.5 | 44.9         | 29.7 | 70.3 |
| NE                             | 13.3        | 31.6 | 44.9         | 29.6 | 70.4 |
| SE                             | 13.5        | 31.3 | 44.9         | 30.1 | 69.9 |

| Side view, without MeCN ligands |             |      |              |      |      |
|---------------------------------|-------------|------|--------------|------|------|
| %V Free                         | %V Buried   |      | % V Tot/V Ex |      |      |
| 29.8                            | <b>70.2</b> |      | 99.9         |      |      |
| Qua-<br>drant                   | V f         | V b  | V t          | %V f | %V b |
| SW                              | 13.3        | 31.5 | 44.9         | 29.7 | 70.3 |
| NW                              | 14.1        | 30.7 | 44.9         | 31.5 | 68.5 |
| NE                              | 12.7        | 32.1 | 44.9         | 28.4 | 71.6 |
| SE                              | 13.3        | 31.5 | 44.9         | 29.7 | 70.3 |

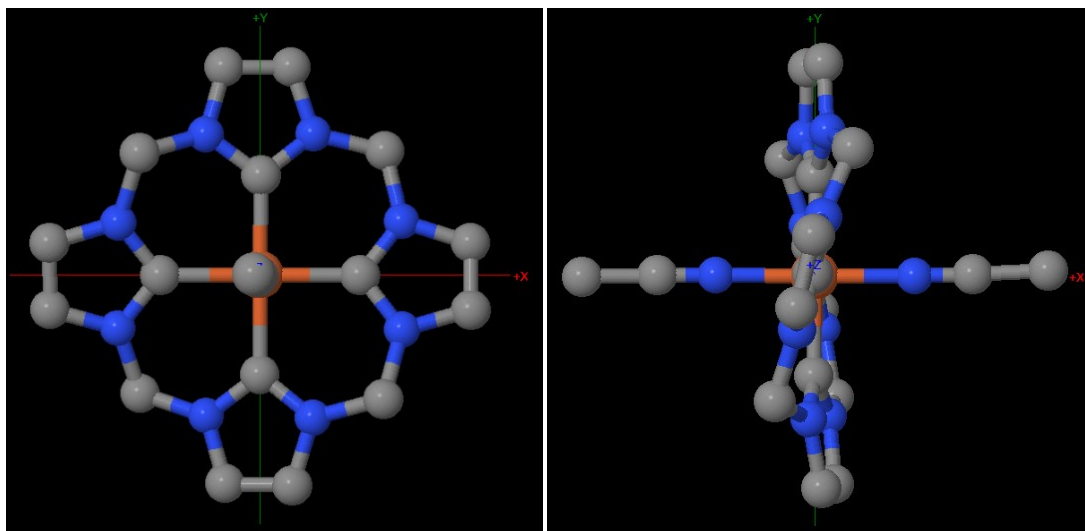

**Fig. S10** Visualization of complex **B** (*JSmol* window) and assignment of the x, y, z axes with view on top (left) and towards the NHC ligand (right).

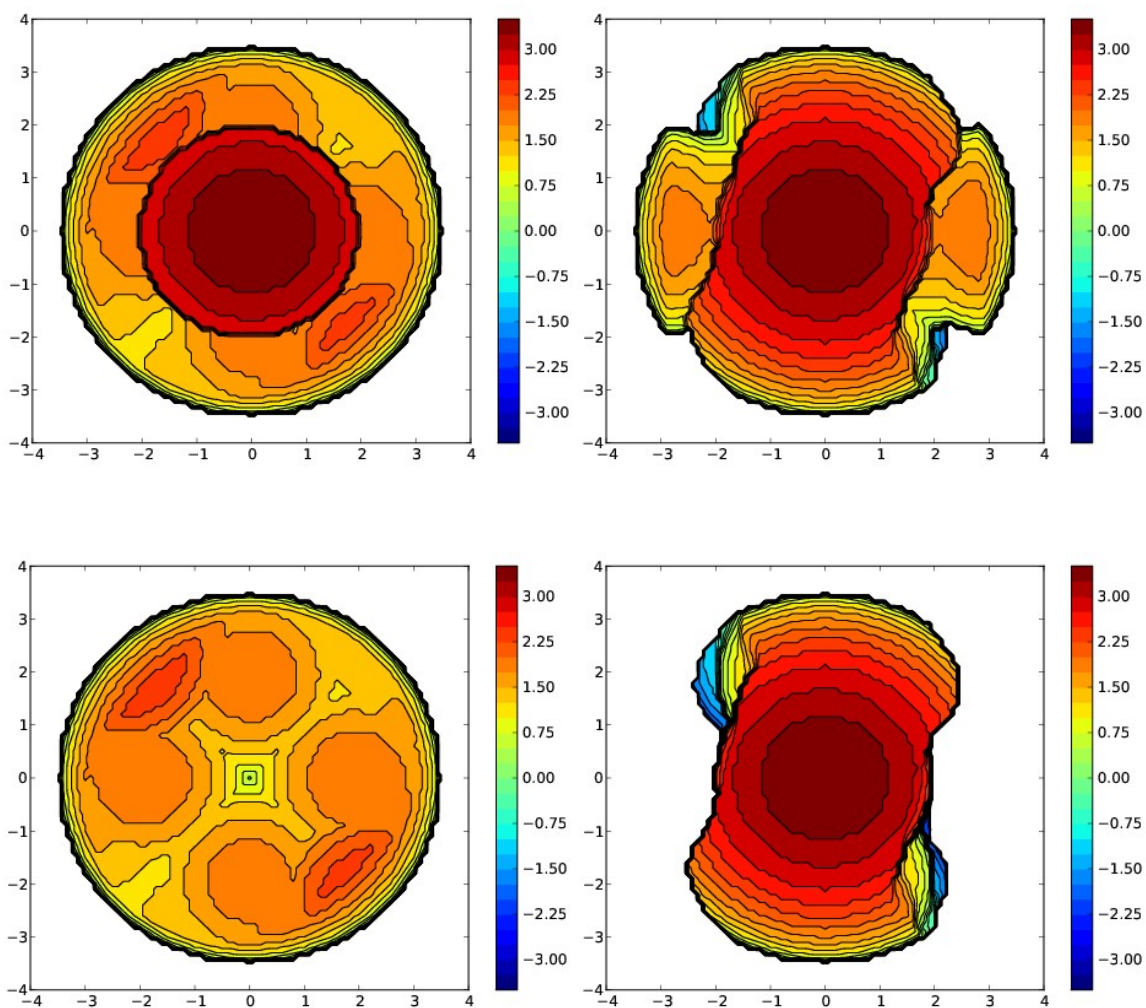

**Fig. S11** Topographic steric map of the buried volume of **B** with (top) and without (bottom) labile MeCN ligands with view on top (left) and towards the NHC ligand (right). The red and blue colors show the more- and less-hindered zones in the catalytic center, respectively.

**Table S5** Calculated buried volume for B.

| Top view, with MeCN ligands |             |      |              |      |      |
|-----------------------------|-------------|------|--------------|------|------|
| %V Free                     | %V Buried   |      | % V Tot/V Ex |      |      |
| 11.4                        | <b>88.6</b> |      | 99.9         |      |      |
| Qua-<br>drant               | V f         | V b  | V t          | %V f | %V b |
| SW                          | 4.8         | 40.1 | 44.9         | 10.7 | 89.3 |
| NW                          | 5.0         | 39.9 | 44.9         | 11.0 | 89.0 |
| NE                          | 5.6         | 39.3 | 44.9         | 12.5 | 87.5 |
| SE                          | 5.2         | 39.7 | 44.9         | 11.6 | 88.4 |

| Side view, with MeCN ligands |             |      |              |      |      |
|------------------------------|-------------|------|--------------|------|------|
| %V Free                      | %V Buried   |      | % V Tot/V Ex |      |      |
| 11.5                         | <b>88.5</b> |      | 99.9         |      |      |
| Qua-<br>drant                | V f         | V b  | V t          | %V f | %V b |
| SW                           | 4.9         | 40.0 | 44.9         | 10.9 | 89.1 |
| NW                           | 5.1         | 39.7 | 44.9         | 11.5 | 88.5 |
| NE                           | 4.8         | 40.0 | 44.9         | 10.8 | 89.2 |
| SE                           | 5.7         | 39.2 | 44.9         | 12.6 | 87.4 |

| Top view, without MeCN ligands |             |      |              |      |      |
|--------------------------------|-------------|------|--------------|------|------|
| %V Free                        | %V Buried   |      | % V Tot/V Ex |      |      |
| 30.8                           | <b>69.2</b> |      | 99.9         |      |      |
| Qua-<br>drant                  | V f         | V b  | V t          | %V f | %V b |
| SW                             | 13.7        | 31.2 | 44.9         | 30.5 | 69.5 |
| NW                             | 13.7        | 31.2 | 44.9         | 30.5 | 69.5 |
| NE                             | 14.1        | 30.8 | 44.9         | 31.4 | 68.6 |
| SE                             | 13.8        | 31.0 | 44.9         | 30.8 | 69.2 |

| Side view, without MeCN ligands |             |      |              |      |      |
|---------------------------------|-------------|------|--------------|------|------|
| %V Free                         | %V Buried   |      | % V Tot/V Ex |      |      |
| 30.8                            | <b>69.2</b> |      | 99.9         |      |      |
| Qua-<br>drant                   | V f         | V b  | V t          | %V f | %V b |
| SW                              | 13.4        | 31.4 | 44.9         | 30.0 | 70.0 |
| NW                              | 13.9        | 30.9 | 44.9         | 31.1 | 68.9 |
| NE                              | 13.6        | 31.3 | 44.9         | 30.2 | 69.8 |
| SE                              | 14.3        | 30.6 | 44.9         | 31.8 | 68.2 |

#### 4. Thermochromism

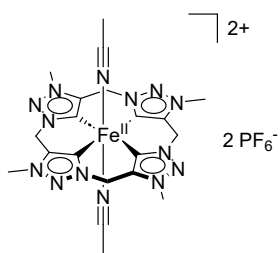

77 K

r.t.

400 K

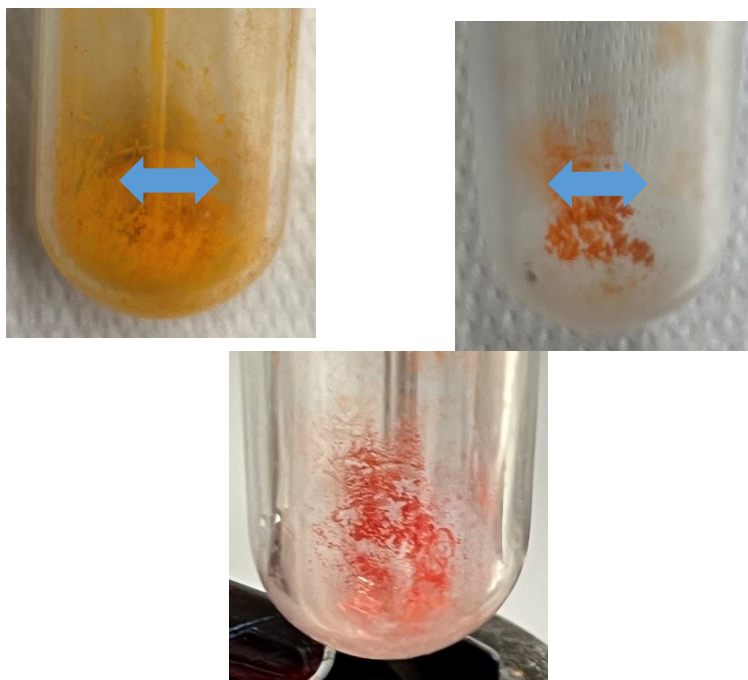

Fig. S12 Colour change of Fe<sup>II</sup> complex 1 from r.t. to 77 K and to 400 K.

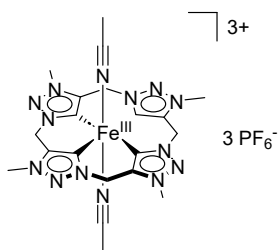

77 K

r.t.

400 K

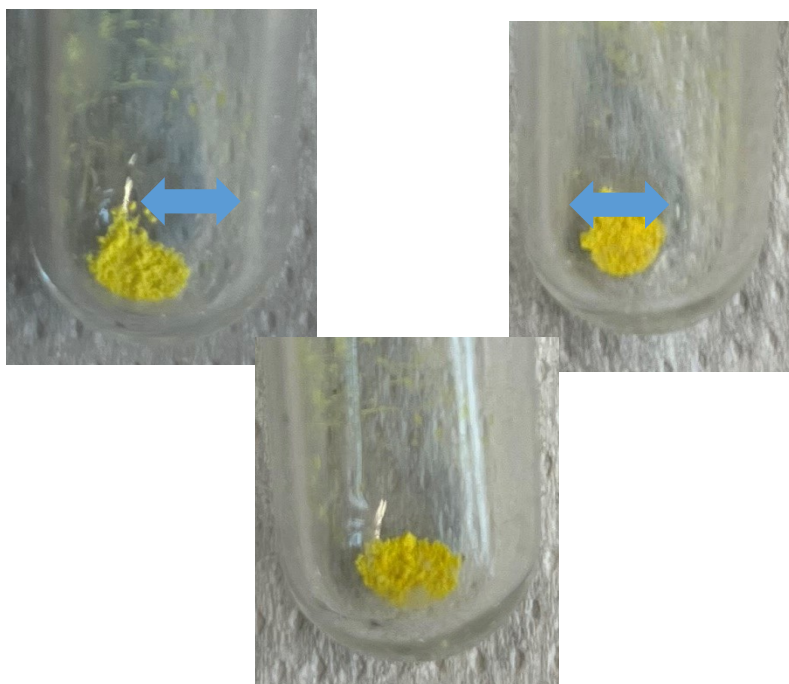

**Fig. S13** Colour change of Fe<sup>III</sup> complex **2** from r.t. to 77 K and to 400 K.



## 5. Magnetic susceptibility

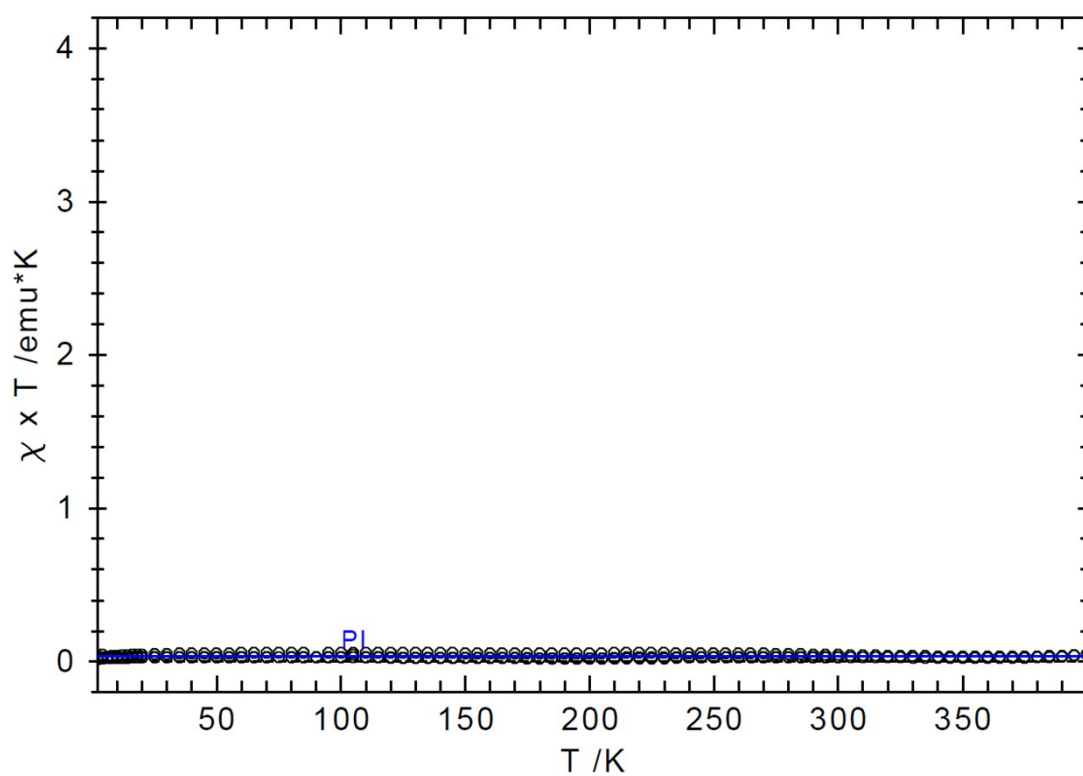

**Fig. S14** Magnetic susceptibility data for **1** at 5000 Oe. Circles represent the experimental data; blue line represents the simulation.

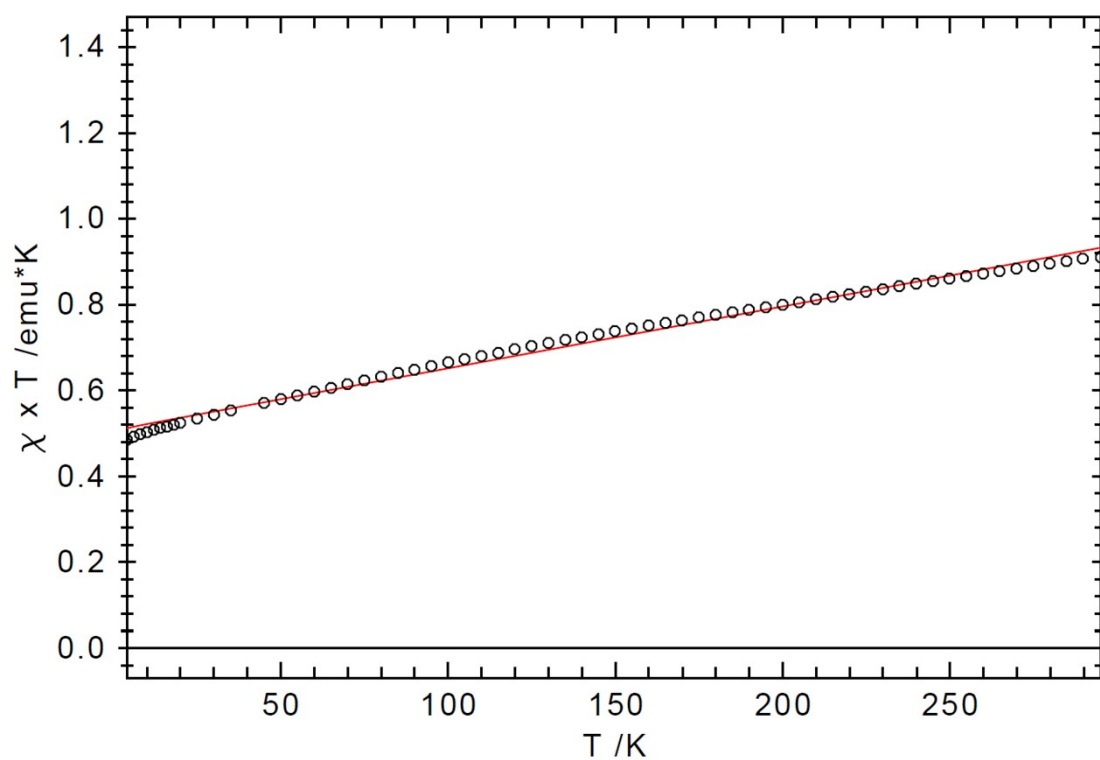

**Fig. S15** Magnetic susceptibility data for **2** at 5000 Oe. Circles represent the experimental data; red line represents the simulation.

## 6. HR-ESI-MS

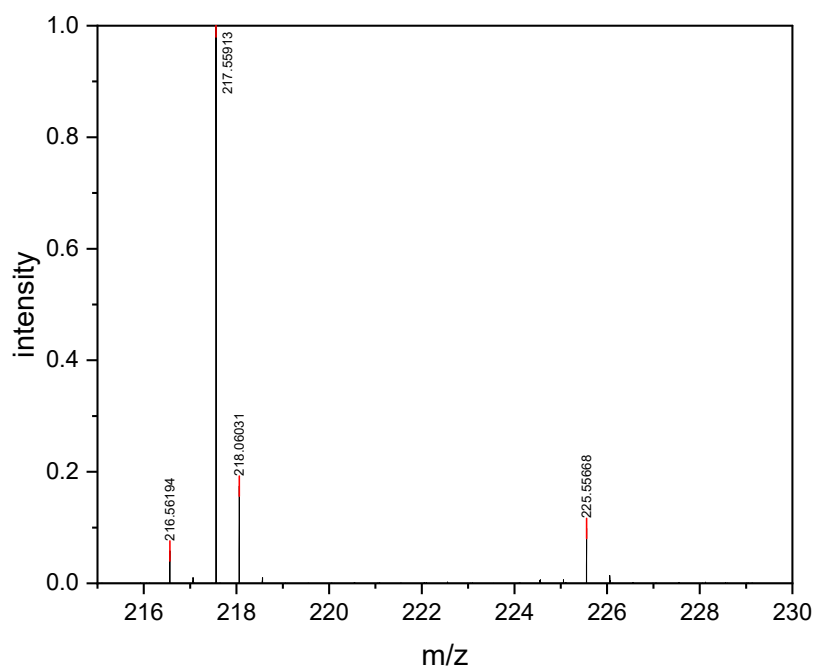

**Fig. S16** HR-ESI-MS spectrum of **1** in MeCN with the addition of 10 eq. H<sub>2</sub>O<sub>2</sub> (50% aq.).

**HR-ESI-MS**  $m/z$  [FeL (-H<sup>+</sup>)]<sup>2+</sup> calcd.: 217.5594, found: 217.5591; [FeL]<sup>2+</sup> calcd.: 218.0633 found: 218.0630; [FeLO (-H<sup>+</sup>)]<sup>2+</sup> calcd.: 225.5569 found: 225.5567; L = aNHC-Ligand.

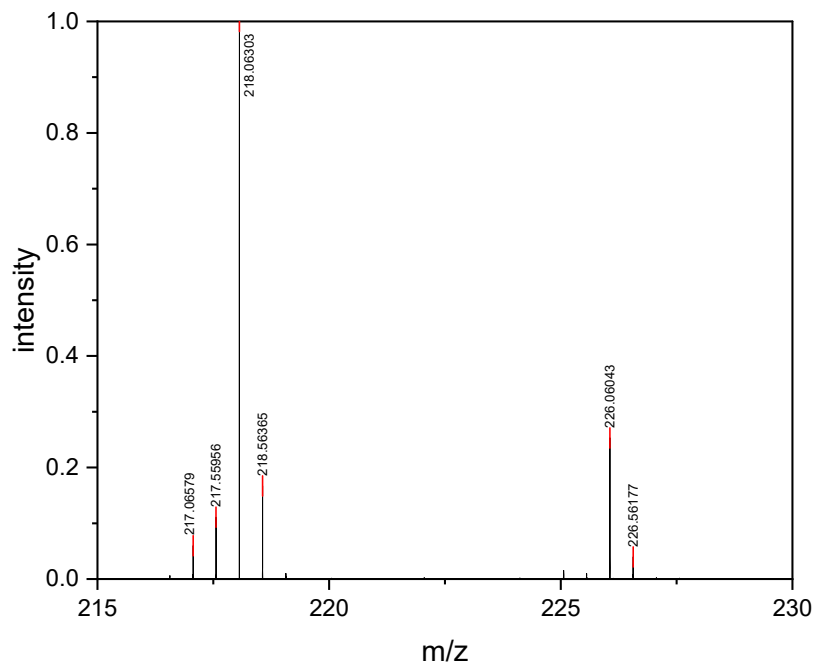

**Fig. S17** HR-ESI-MS spectrum of **1** in MeCN under ambient conditions.

**HR-ESI-MS**  $m/z$  [FeL (-H<sup>+</sup>)]<sup>2+</sup> calcd.: 217.5594, found: 217.5596; [FeL]<sup>2+</sup> calcd.: 218.0633 found: 218.0630; [FeLO]<sup>2+</sup> calcd.: 226.0608 found: 226.0601; L = aNHC-Ligand.

## 7. <sup>1</sup>H-NMR spectra of catalytic substance screening

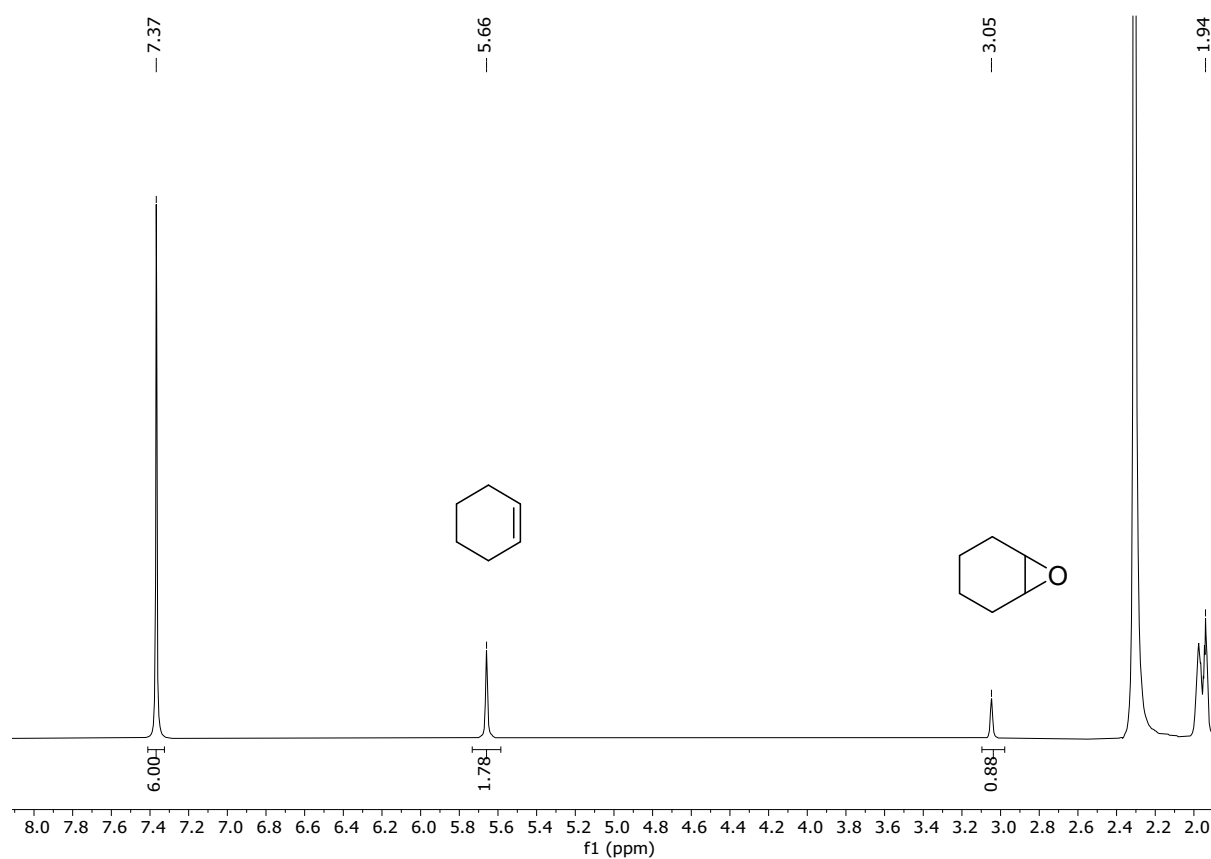

**Fig. S18** Section of the <sup>1</sup>H-NMR spectrum of the epoxidation of *cis*-cyclohexene (67.3 μmol/mL, 1.00 eq.) with H<sub>2</sub>O<sub>2</sub> (50% aq., 1.50 eq., 101 μmol/mL), catalyst **1** (1.35 μmol/mL, 0.005 eq.) and Sc(OTf)<sub>3</sub> as additive (8.41 μmol/mL, 0.10 eq.) at 20 °C in CD<sub>3</sub>CN with a reaction time of 10 s.

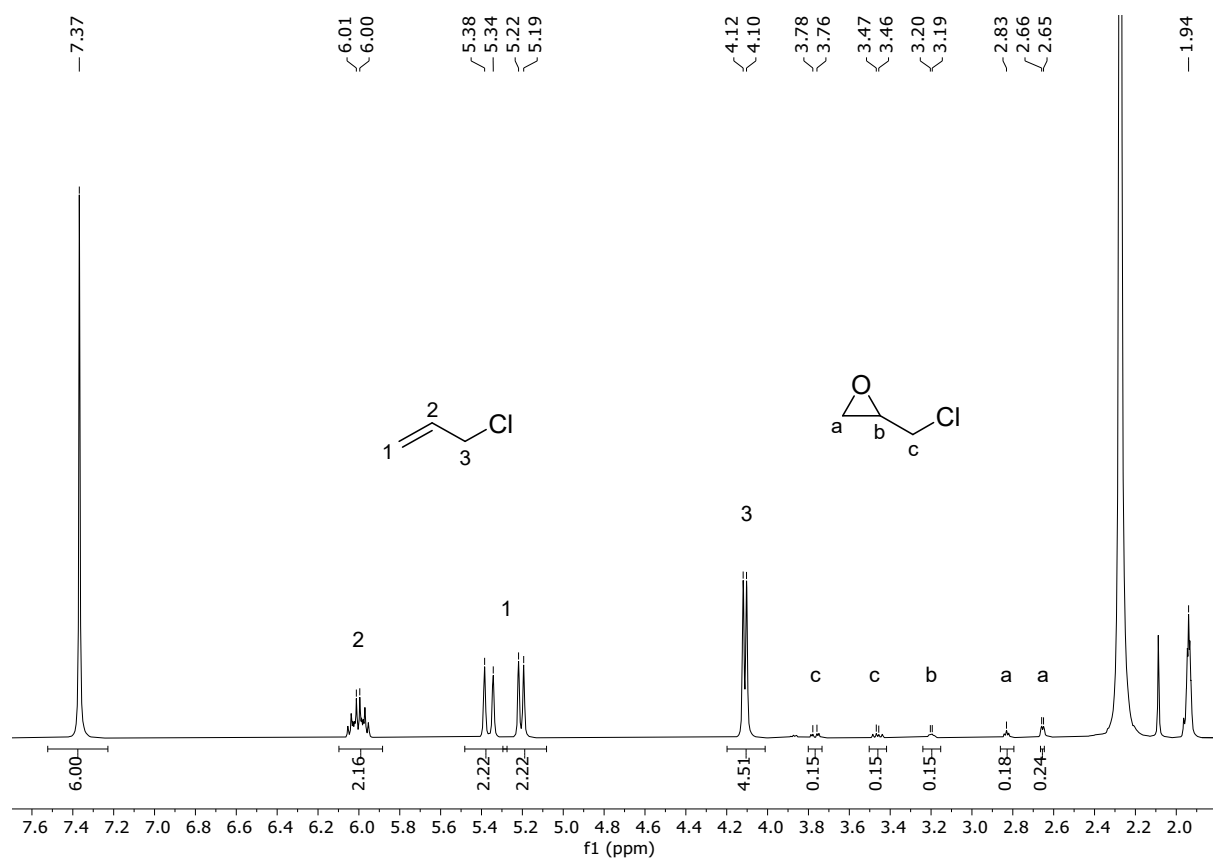

**Fig. S19** Section of the  $^1\text{H}$ -NMR spectrum of the epoxidation of allyl chloride (67.3  $\mu\text{mol/mL}$ , 1.00 eq.) with  $\text{H}_2\text{O}_2$  (50% aq., 1.50 eq., 101  $\mu\text{mol/mL}$ ), catalyst **1** (1.35  $\mu\text{mol/mL}$ , 0.005 eq.) and  $\text{Sc}(\text{OTf})_3$  as additive (8.41  $\mu\text{mol/mL}$ , 0.10 eq.) at 20  $^\circ\text{C}$  in  $\text{CD}_3\text{CN}$  with a reaction time of 1 h.

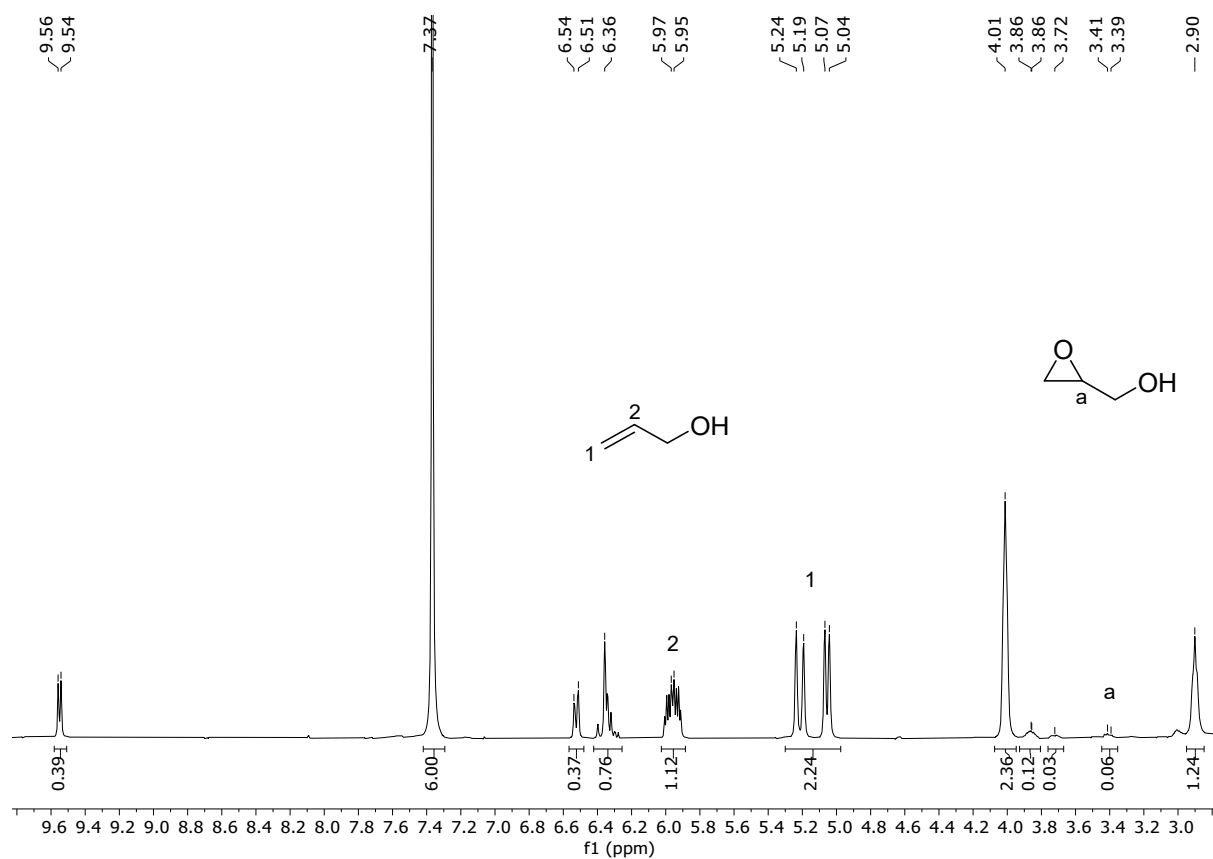

**Fig. S20** Section of the  $^1\text{H}$ -NMR spectrum of the epoxidation of allyl alcohol ( $67.3 \mu\text{mol/mL}$ , 1.00 eq.) with  $\text{H}_2\text{O}_2$  (50% aq., 1.50 eq.,  $101 \mu\text{mol/mL}$ ), catalyst **1** ( $1.35 \mu\text{mol/mL}$ , 0.005 eq.) and  $\text{Sc}(\text{OTf})_3$  as additive ( $8.41 \mu\text{mol/mL}$ , 0.10 eq.) at  $20^\circ\text{C}$  in  $\text{CD}_3\text{CN}$  with a reaction time of 1 h. Estimation regarding the formation of diverse side products: diol (3.86 ppm), acrolein (6.22 – 6.59, 9.55 ppm).

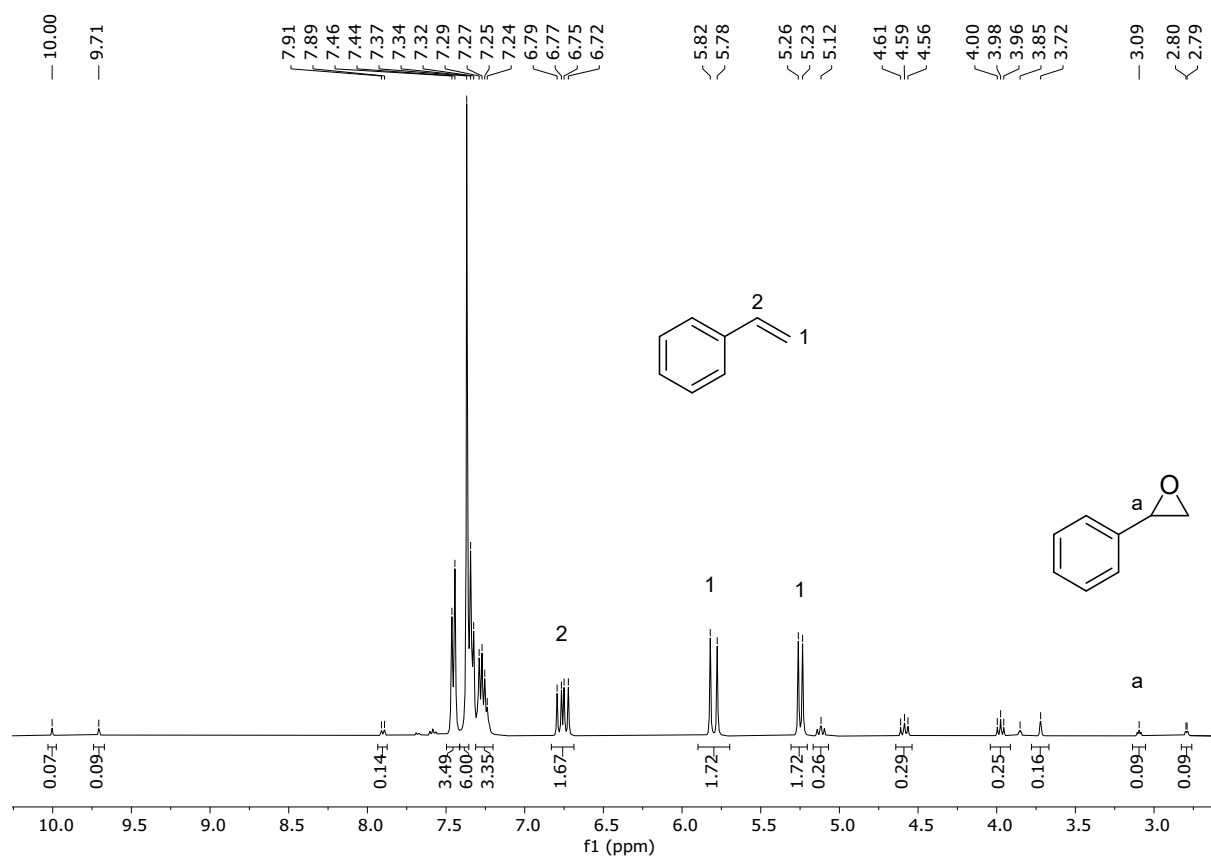

**Fig. S21** Section of the  $^1\text{H-NMR}$  spectrum of the epoxidation of styrene ( $67.3 \mu\text{mol/mL}$ ,  $1.00 \text{ eq.}$ ) with  $\text{H}_2\text{O}_2$  ( $50\% \text{ aq.}$ ,  $1.50 \text{ eq.}$ ,  $101 \mu\text{mol/mL}$ ), catalyst **1** ( $1.35 \mu\text{mol/mL}$ ,  $0.005 \text{ eq.}$ ) and  $\text{Sc}(\text{OTf})_3$  as additive ( $8.41 \mu\text{mol/mL}$ ,  $0.10 \text{ eq.}$ ) at  $20^\circ\text{C}$  in  $\text{CD}_3\text{CN}$  with a reaction time of  $10 \text{ s}$ . Estimation regarding the formation of diverse side products: phenethyl alcohol ( $3.99$ ,  $5.12 \text{ ppm}$ ), phenylacetaldehyde ( $9.71 \text{ ppm}$ ), benzaldehyde ( $10.01 \text{ ppm}$ ).

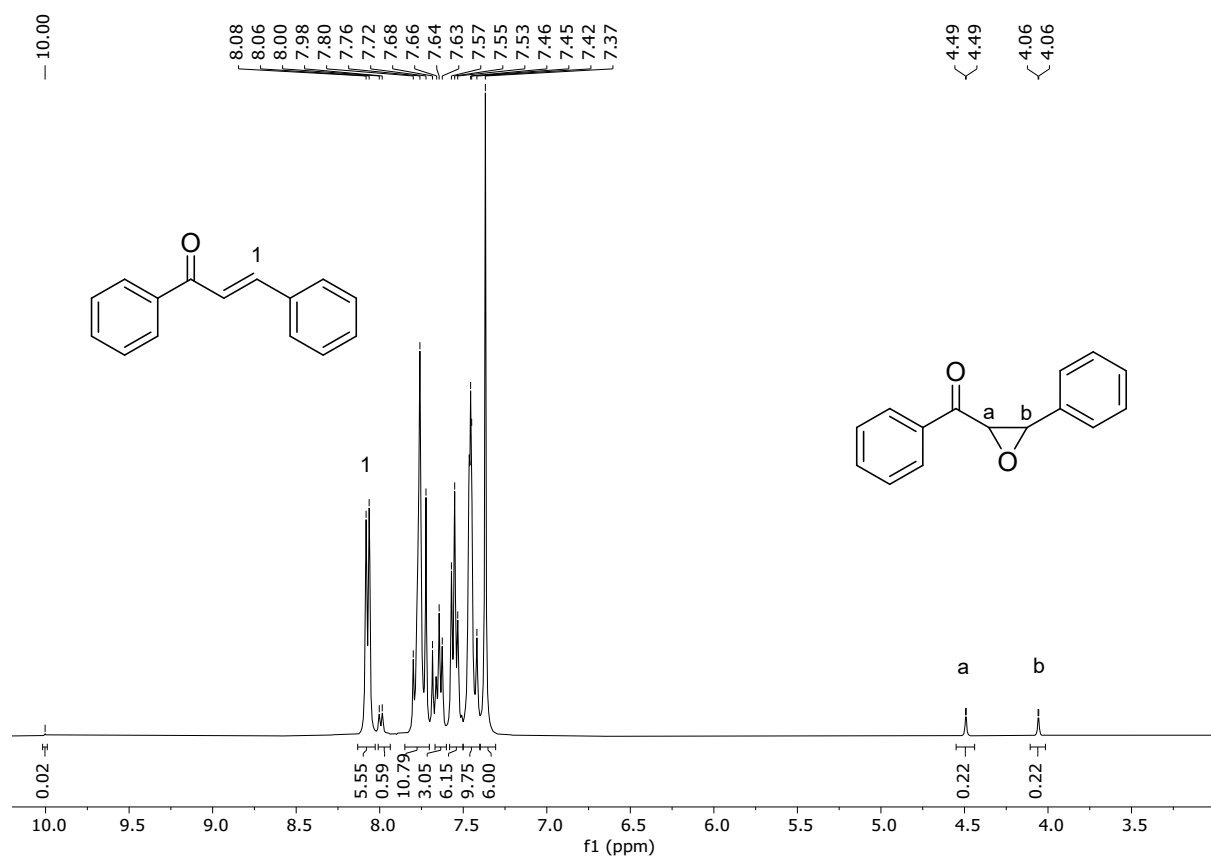

**Fig. S22** Section of the  $^1\text{H-NMR}$  spectrum of the epoxidation of chalcone ( $67.3 \mu\text{mol/mL}$ , 1.00 eq.) with  $\text{H}_2\text{O}_2$  (50% aq., 1.50 eq.,  $101 \mu\text{mol/mL}$ ), catalyst **1** ( $1.35 \mu\text{mol/mL}$ , 0.005 eq.) and  $\text{Sc}(\text{OTf})_3$  as additive ( $8.41 \mu\text{mol/mL}$ , 0.10 eq.) at  $20^\circ\text{C}$  in  $\text{CD}_3\text{CN}$  with a reaction time of 10 s. Estimation regarding the formation of the side product: benzaldehyde (10.00 ppm).

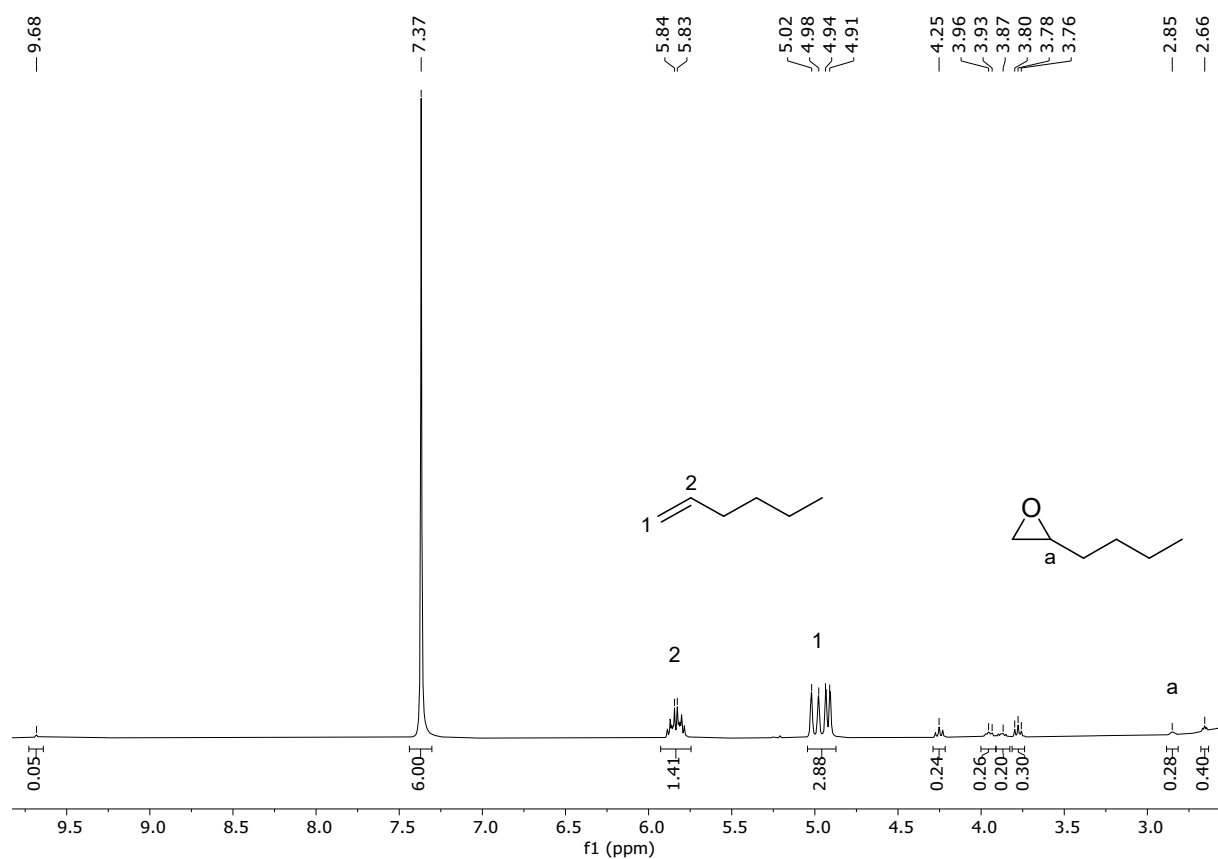

**Fig. S23** Section of the  $^1\text{H-NMR}$  spectrum of the epoxidation of 1-hexene ( $67.3 \mu\text{mol/mL}$ , 1.00 eq.) with  $\text{H}_2\text{O}_2$  (50% aq., 1.50 eq.,  $101 \mu\text{mol/mL}$ ), catalyst **1** ( $1.35 \mu\text{mol/mL}$ , 0.005 eq.) and  $\text{Sc}(\text{OTf})_3$  as additive ( $8.41 \mu\text{mol/mL}$ , 0.10 eq.) at  $20^\circ\text{C}$  in  $\text{CD}_3\text{CN}$  with a reaction time of 1 h. Estimation regarding the formation of the side product: diol (3.70 – 4.30 ppm), aldehyde (9.68 ppm).



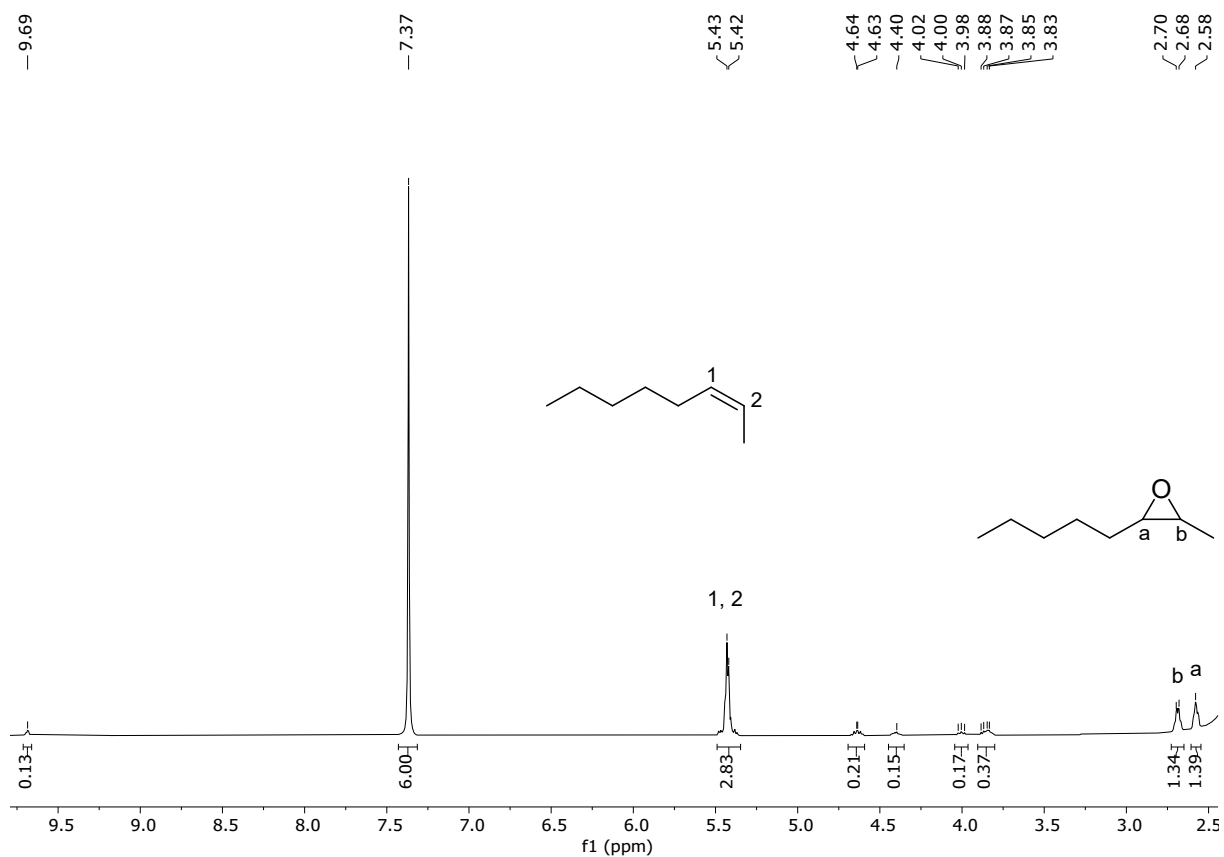

**Fig. S24** Section of the  $^1\text{H-NMR}$  spectrum of the epoxidation of *cis*-2-octene (67.3  $\mu\text{mol/mL}$ , 1.00 eq.) with  $\text{H}_2\text{O}_2$  (50% aq., 1.50 eq., 101  $\mu\text{mol/mL}$ ), catalyst **1** (1.35  $\mu\text{mol/mL}$ , 0.005 eq.) and  $\text{Sc}(\text{OTf})_3$  as additive (8.41  $\mu\text{mol/mL}$ , 0.10 eq.) at 20  $^\circ\text{C}$  in  $\text{CD}_3\text{CN}$  with a reaction time of 1 h. Full conversion, estimation regarding the formation of diverse side products: diols (3.70 – 4.10 ppm), aldehyde (9.69 ppm).

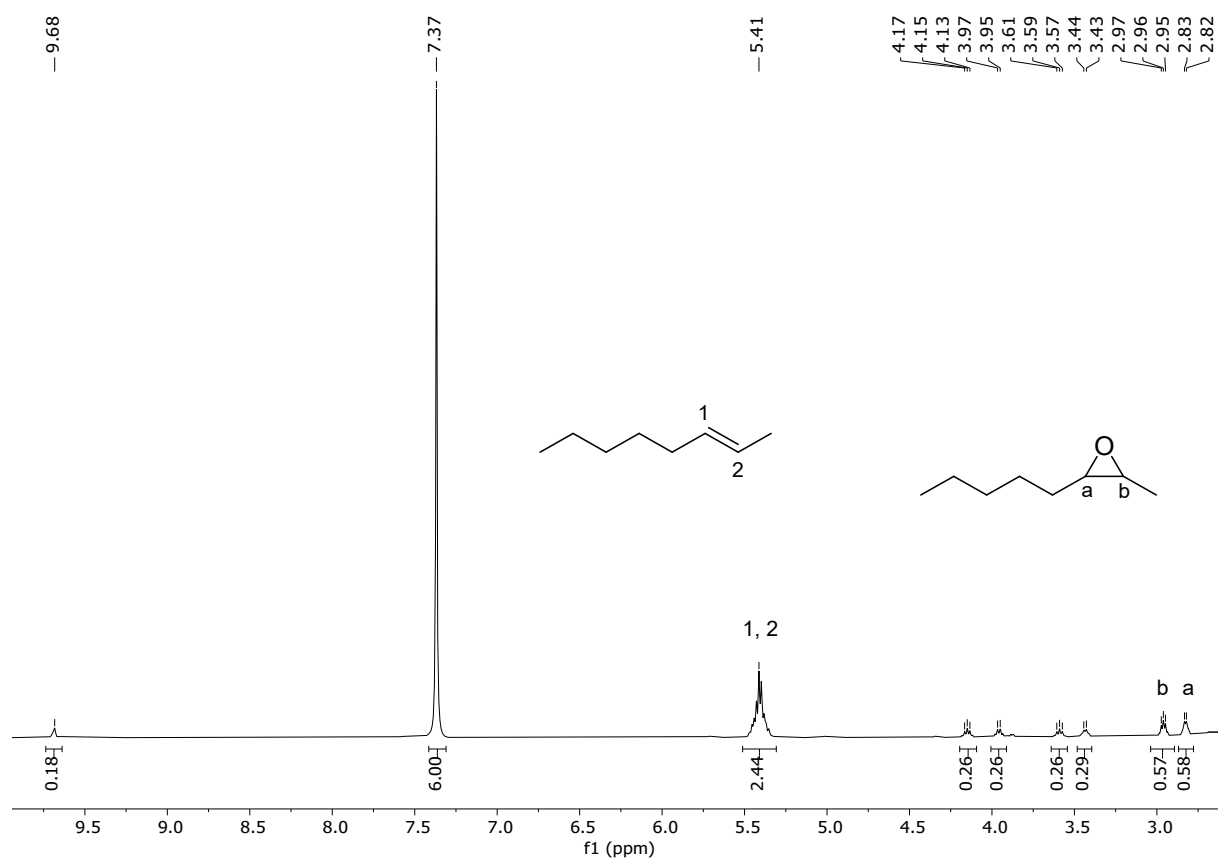

**Fig. S25** Section of the <sup>1</sup>H-NMR spectrum of the epoxidation of *trans*-2-octene (67.3 μmol/mL, 1.00 eq.) with H<sub>2</sub>O<sub>2</sub> (50% aq., 1.50 eq., 101 μmol/mL), catalyst **1** (1.35 μmol/mL, 0.005 eq.) and Sc(OTf)<sub>3</sub> as additive (8.41 μmol/mL, 0.10 eq.) at 20 °C in CD<sub>3</sub>CN with a reaction time of 1 h. Full conversion, estimation regarding the formation of diverse side products: diols (3.40 – 4.20 ppm), aldehyde (9.68 ppm).

## 8. DFT calculations

Optimisation and single point calculations were performed using Gaussian 16<sup>14</sup> and processed with GaussView 6.0<sup>15</sup>. Initial parameters for the gas phase calculations were imported from the respective crystal structures or modified accordingly. Geometry optimizations were carried out without applying constraint coordinates. The hybrid functional including dispersion B97D3/gen was used and the def2-SVP basis set was applied for small atoms. For Fe the Stuttgart/Dresden 1997 SDD relativistic effective core potential (ECP) and its respective basis was utilized. The obtained structures are true ground states, as shown by the absence of significant imaginary frequencies ( $< 8 \text{ cm}^{-1}$ ) found by vibrational analysis. Solvation calculations were performed using the SCRF = Acetonitrile ( $\epsilon = 35.688$ ) option with both the universal solvation model (SMD) and the polarizable continuum model (PCM).<sup>16,17</sup> CD Löwdin charges were calculated for gas phase molecules applying the IOp (6/80 = 1) keyword in Gaussian. In accordance to previous investigations, backbone modified complexes are calculated in the catalytically active oxidation state +III in doublet state<sup>18-22</sup>.

The dissociation of the labile acetonitrile ligand was calculated *via* DFT. As dative bond dissociation energies (BDE) in the gas phase are expectedly higher due to the lacking stabilisation of the released free acetonitrile molecule, solvent model calculations (SMD, PCM) were employed (Table S6a).<sup>16-18</sup> Comparing complex **2** to **1**, the dative bond dissociation energies are raised by 18 – 25% in solution, attributed to the lower electron density at the Fe<sup>III</sup> centre. Regarding the reaction free energy of the dissociation step, the difference amounts to 12 – 22 kJ mol<sup>-1</sup> between **1** and **2**. The comparison to the Gibbs free energy of the overall epoxidation of *cis*-cyclooctene with hydrogen peroxide as oxidant of -49 kJ mol<sup>-1</sup>, suggests that the a five coordinate iron species is a rather short lived intermediate and the empty coordination site will be occupied rapidly with an oxidant molecule or another MeCN molecule in an equilibrium.

**Table S6** BDEs and  $\Delta G$  of the dative bond toward one labile acetonitrile ligand of **1** and **2**.

|          | BDE [kJ mol <sup>-1</sup> ] |            |            | $\Delta G$ [kJ mol <sup>-1</sup> ] |            |            |
|----------|-----------------------------|------------|------------|------------------------------------|------------|------------|
|          | gas phase                   | SMD (MeCN) | PCM (MeCN) | gas phase                          | SMD (MeCN) | PCM (MeCN) |
| <b>1</b> | 130.25                      | 79.84      | 90.40      | 78.70                              | 42.69      | 52.65      |
| <b>2</b> | 174.56                      | 94.32      | 112.97     | 139.68                             | 50.67      | 74.94      |

Bond dissociation energy (BDE). Solvation model based on density (SMD). Polarizable continuum model PCM.

**Table S7** Comparison of DFT calculated selected structural parameters of **1** and **2**.

|          |           | Bond lengths [Å]                 |                      | Bond angles [°] |                                                    |                                                    |
|----------|-----------|----------------------------------|----------------------|-----------------|----------------------------------------------------|----------------------------------------------------|
|          |           | Fe–C <sub>NHC</sub> <sup>a</sup> | Fe–NCMe <sup>b</sup> | MeCN–Fe–NCMe    | C <sub>NHC</sub> –Fe–C <sub>NHC</sub> <sup>c</sup> | C <sub>NHC</sub> –Fe–C <sub>NHC</sub> <sup>d</sup> |
| <b>1</b> | gas phase | 1.9298(1)                        | 1.8835(0)            | 179.990         | 179.922(3)                                         | 90.000(1)                                          |
|          | SMD(MeCN) | 1.9294(1)                        | 1.8780(0)            | 179.994         | 179.979(1)                                         | 90.000(1)                                          |
|          | PCM(MeCN) | 1.9258(0)                        | 1.8760(0)            | 179.980         | 179.889(1)                                         | 90.000(1)                                          |
| <b>2</b> | gas phase | 1.9703(0)                        | 1.9114(0)            | 180.000         | 180.000(0)                                         | 90.000(2)                                          |
|          | SMD(MeCN) | 1.9664(4)                        | 1.8932(0)            | 180.000         | 180.000(0)                                         | 90.000(1)                                          |
|          | PCM(MeCN) | 1.9568(1)                        | 1.8930(1)            | 179.974         | 179.875(6)                                         | 90.000(1)                                          |

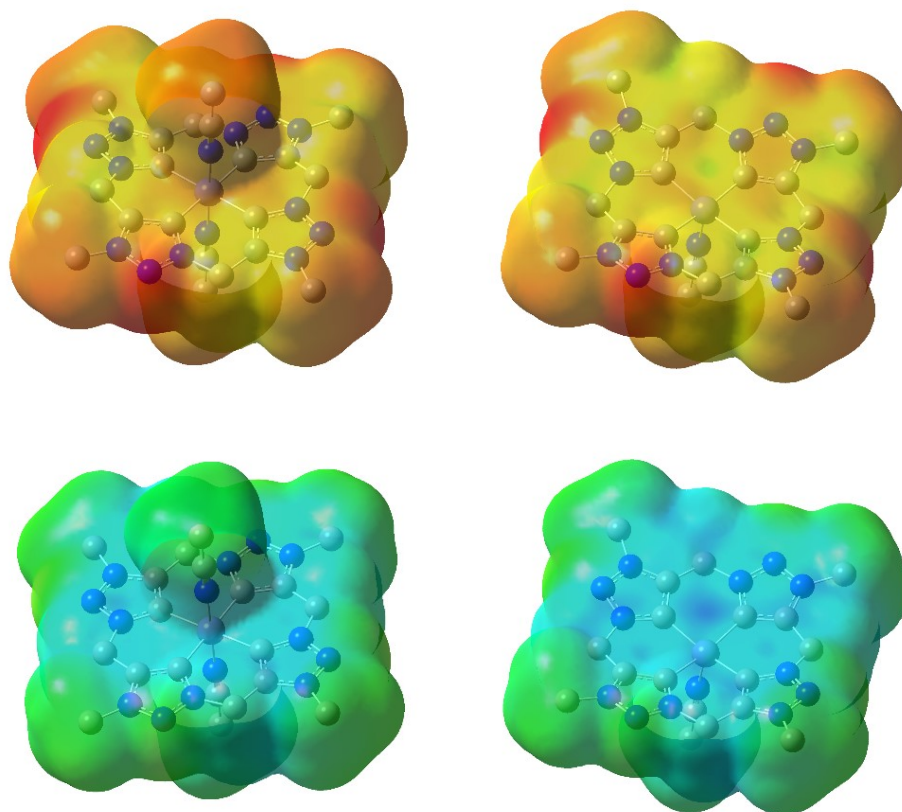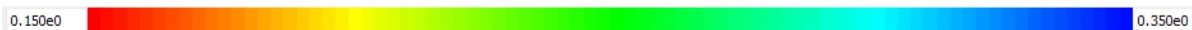

**Fig. S26** Electrostatic potential (ESP) mapped total density plots of Fe<sup>II</sup> complexes **1** and **1-MeCN** with the removal of one labile MeCN ligand (top), and Fe<sup>III</sup> complexes **2** and **2-MeCN** with the removal of one labile MeCN ligand (bottom). The red and blue colours show more- and less-negative charges, respectively.

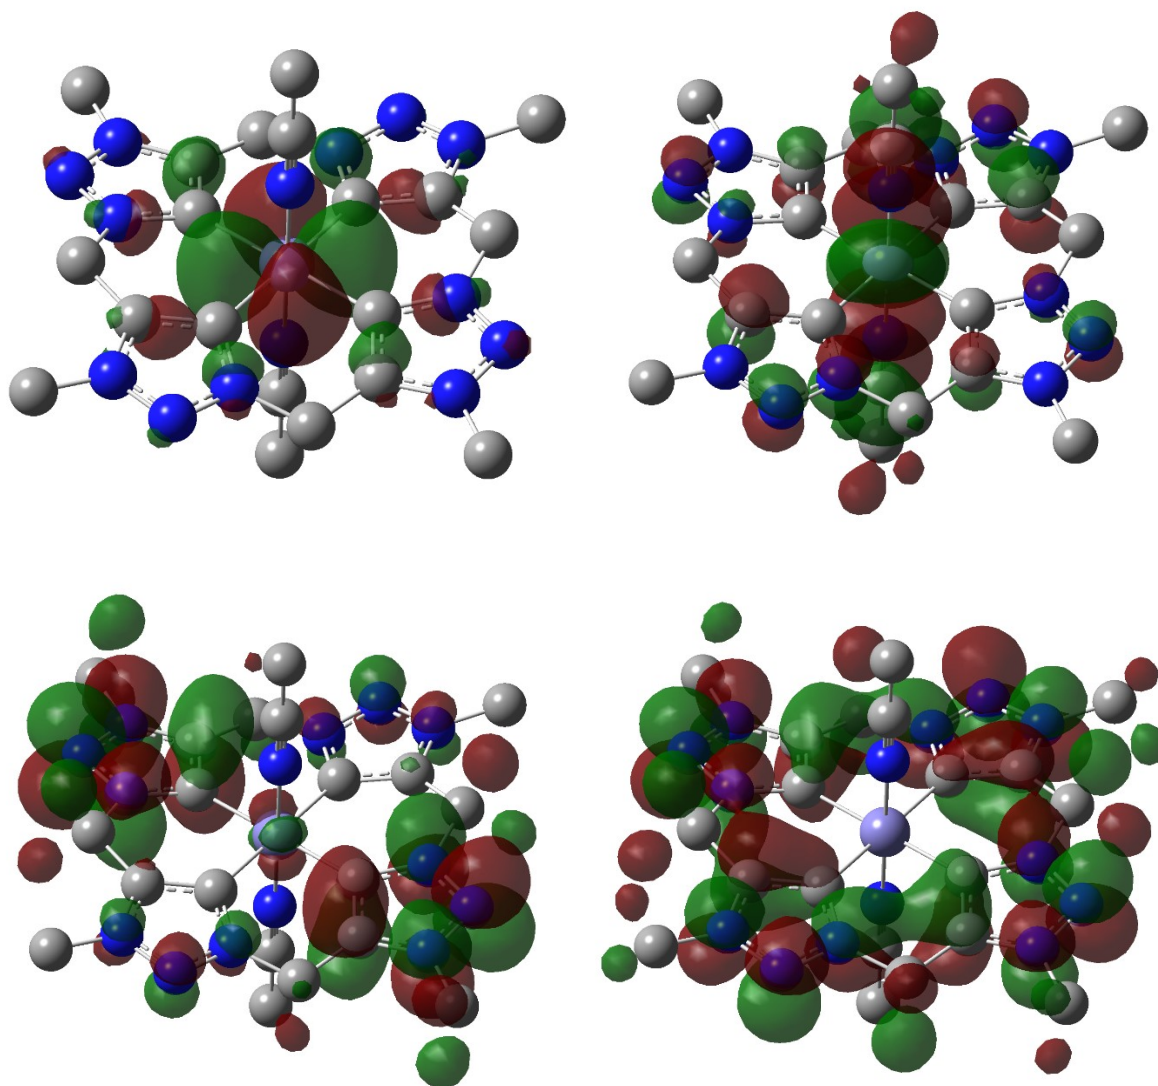

**Fig. S27** Isodensity plots of the HOMO (top, left), HOMO-1 (top, right), LUMO (bottom, left) and LUMO+1 (bottom, right) of **1**. Hydrogen atoms are omitted for clarity. All Isovalues MO = 0.02, Density = 0.0004 and Laplacian = 0.00.

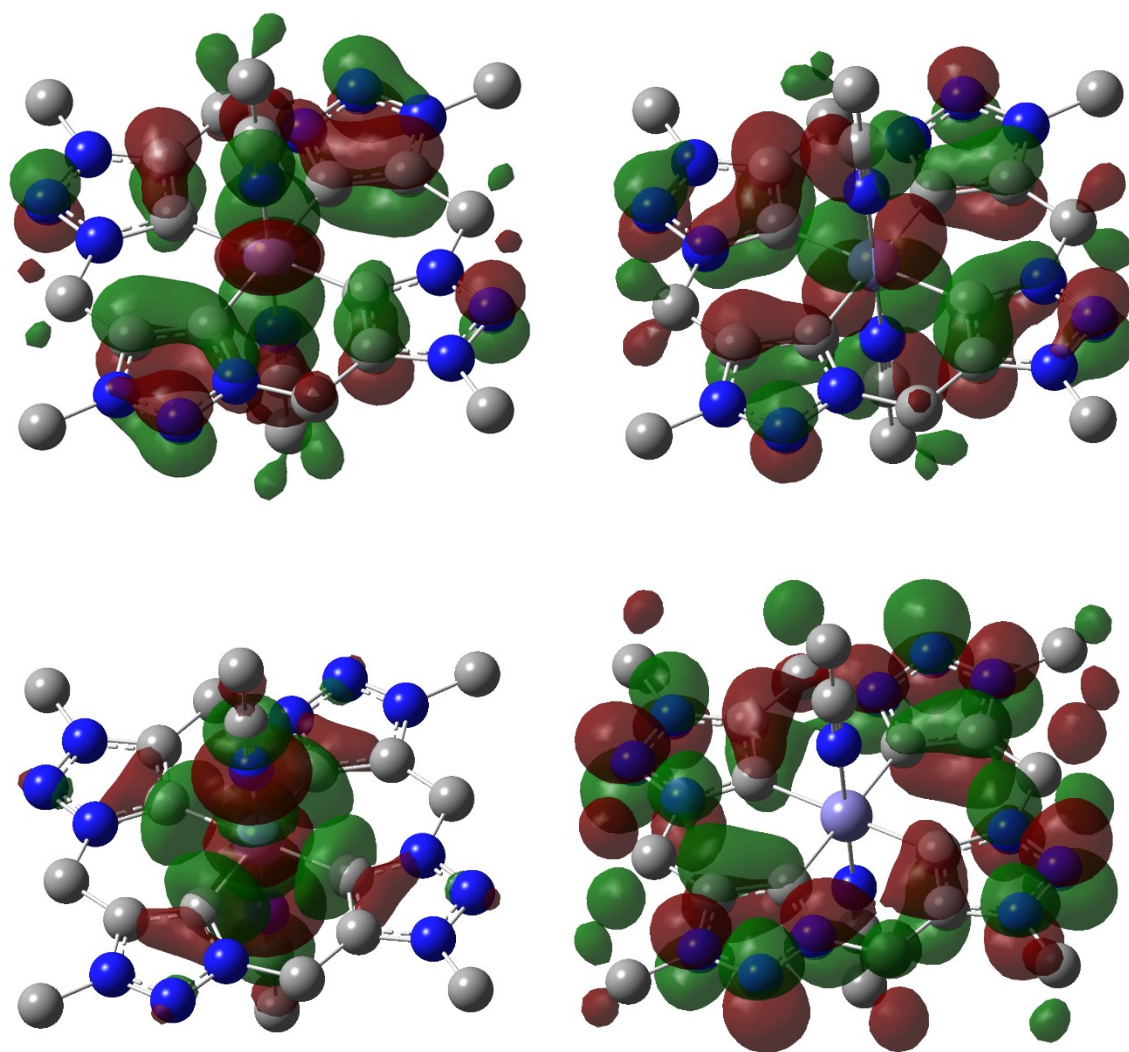

**Fig. S28** Isodensity plots of the  $\alpha$ -HOMO (SOMO) (top, left), HOMO-1 (top, right), LUMO (bottom, left) and LUMO+1 (bottom, right) of **2**. Hydrogen atoms are omitted for clarity. All Isovalues MO = 0.02, Density = 0.0004 and Laplacian = 0.00.

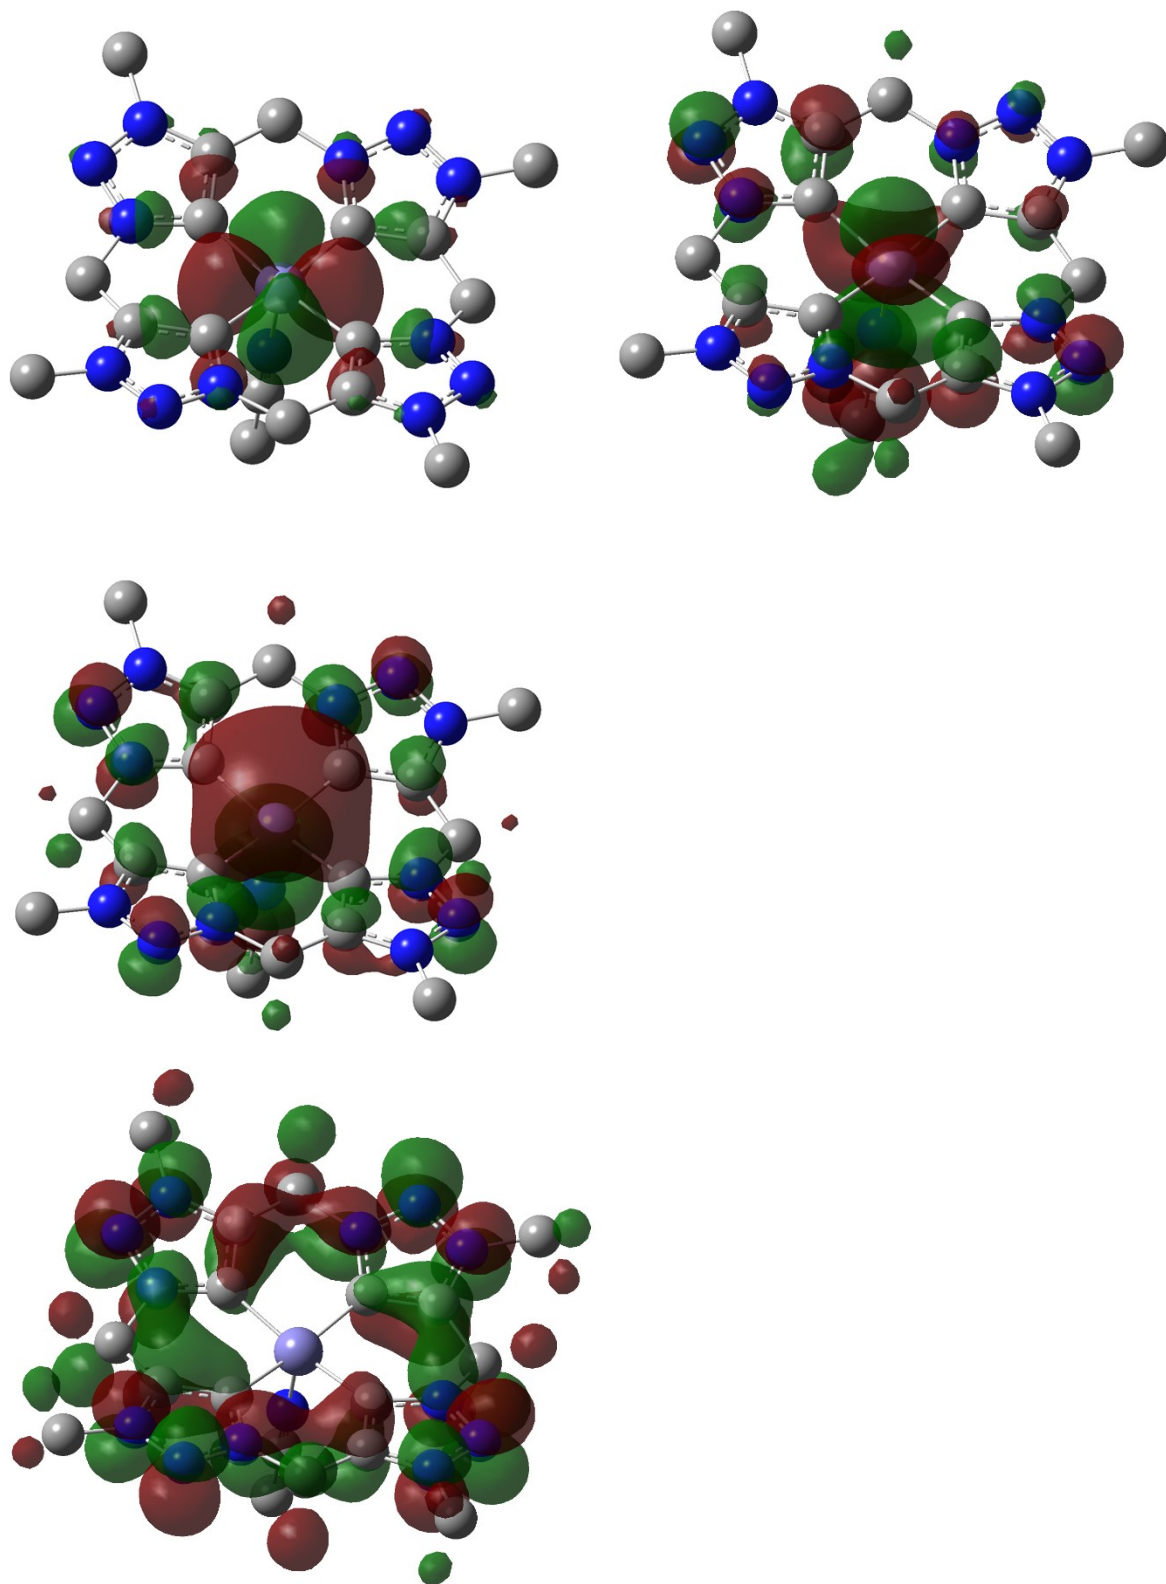

**Fig. S29** Isodensity plots of the HOMO (top, left), HOMO-1 (top, right), LUMO (bottom, left) and LUMO+1 (bottom, right) of 1-MeCN. Hydrogen atoms are omitted for clarity. All Isovalues MO = 0.02, Density = 0.0004 and Laplacian = 0.00.



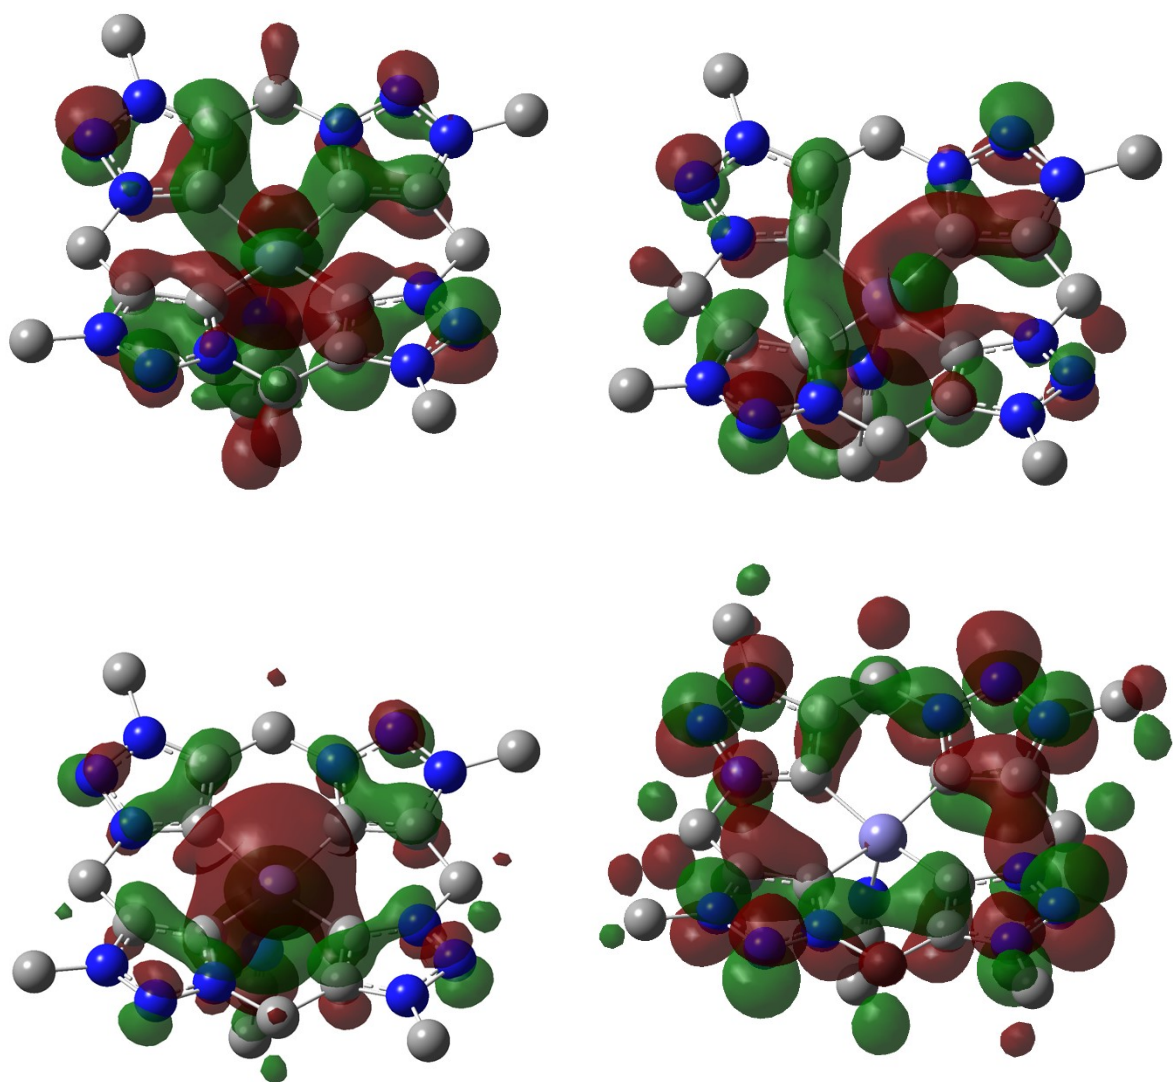

**Fig. S30** Isodensity plots of the  $\alpha$ -HOMO (SOMO) (top, left), HOMO-1 (top, right), LUMO (bottom, left) and LUMO+1 (bottom, right) of 2-MeCN. Hydrogen atoms are omitted for clarity. All Isovalues MO = 0.02, Density = 0.0004 and Laplacian = 0.00.

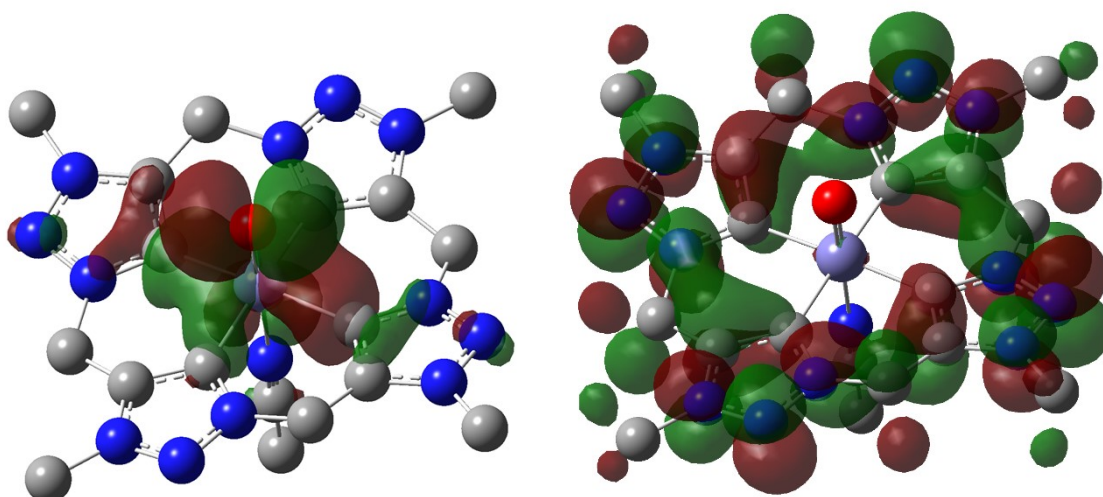

**Fig. S31** Isodensity plots of the  $\alpha$ -HOMO (SOMO) (left) and LUMO (right) of the proposed structure of oxioiron(IV) aNHC species  $\text{Fe}^{\text{IV}}[\text{cCCCC}]_{\text{trz}}\text{O}(\text{MeCN})$ . Hydrogen atoms are omitted for clarity. All Isovalues MO = 0.02, Density = 0.0004 and Laplacian = 0.00.

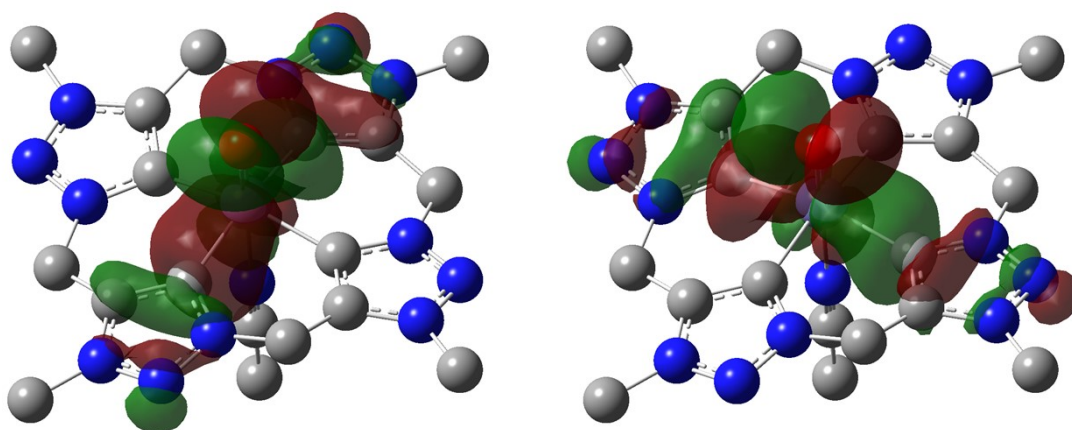

**Fig. S32** Isodensity plots of the  $\alpha$ -HOMO (SOMO) (left) and LUMO (right) of the proposed structure of oxioiron(V) aNHC species  $\text{Fe}^{\text{V}}[\text{cCCCC}]_{\text{trz}}\text{O}(\text{MeCN})$ . Hydrogen atoms are omitted for clarity. All Isovalues MO = 0.02, Density = 0.0004 and Laplacian = 0.00.

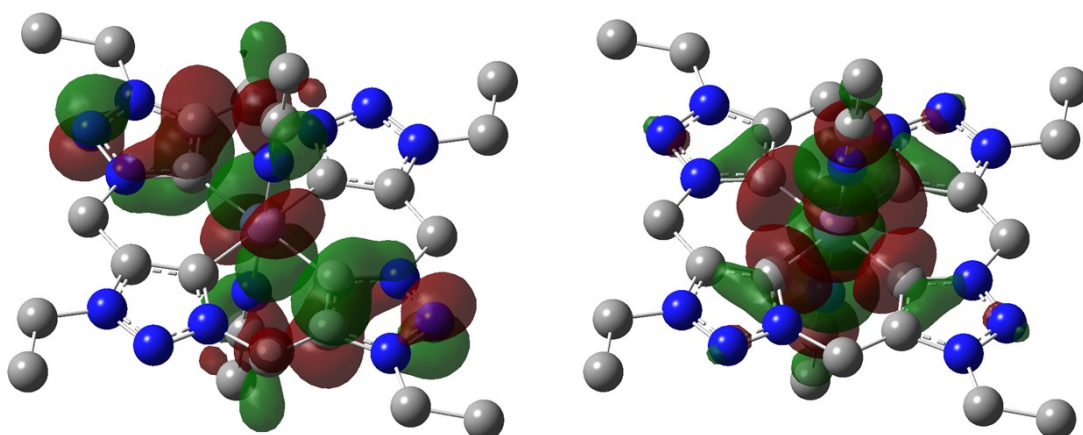

**Fig. S33** Isodensity plots of the  $\alpha$ -HOMO (SOMO) (left) and LUMO (right) of **2a**. Hydrogen atoms are omitted for clarity. All Isovalues MO = 0.02, Density = 0.0004 and Laplacian = 0.00.

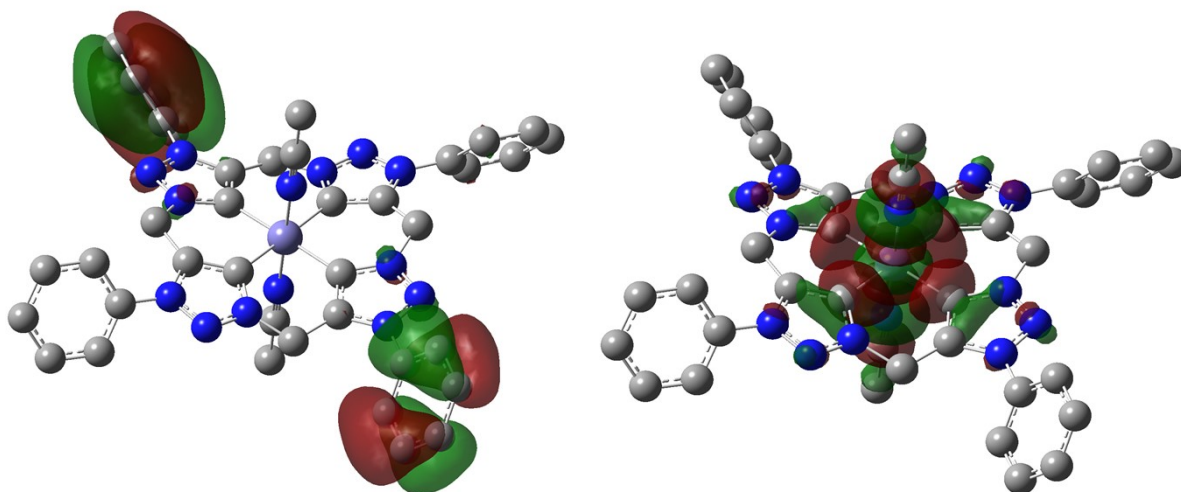

**Fig. S34** Isodensity plots of the  $\alpha$ -HOMO (SOMO) (left) and LUMO (right) of **2b**. Hydrogen atoms are omitted for clarity. All Isovalues MO = 0.02, Density = 0.0004 and Laplacian = 0.00.

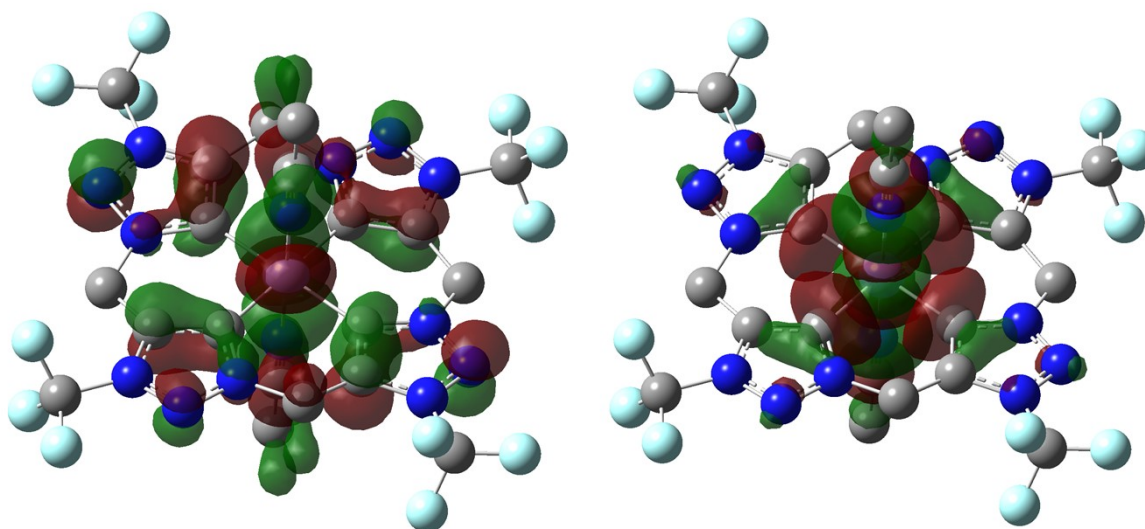

**Fig. S35** Isodensity plots of the  $\alpha$ -HOMO (SOMO) (left) and LUMO (right) of **2c**. Hydrogen atoms are omitted for clarity. All Isovalues MO = 0.02, Density = 0.0004 and Laplacian = 0.00.

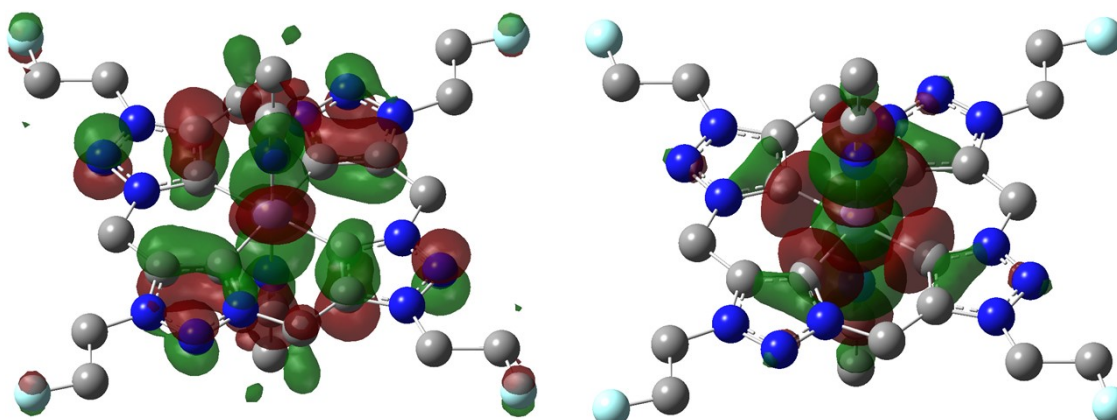

**Fig. S36** Isodensity plots of the  $\alpha$ -HOMO (SOMO) (left) and LUMO (right) of **2d**. Hydrogen atoms are omitted for clarity. All Isovalues MO = 0.02, Density = 0.0004 and Laplacian = 0.00.

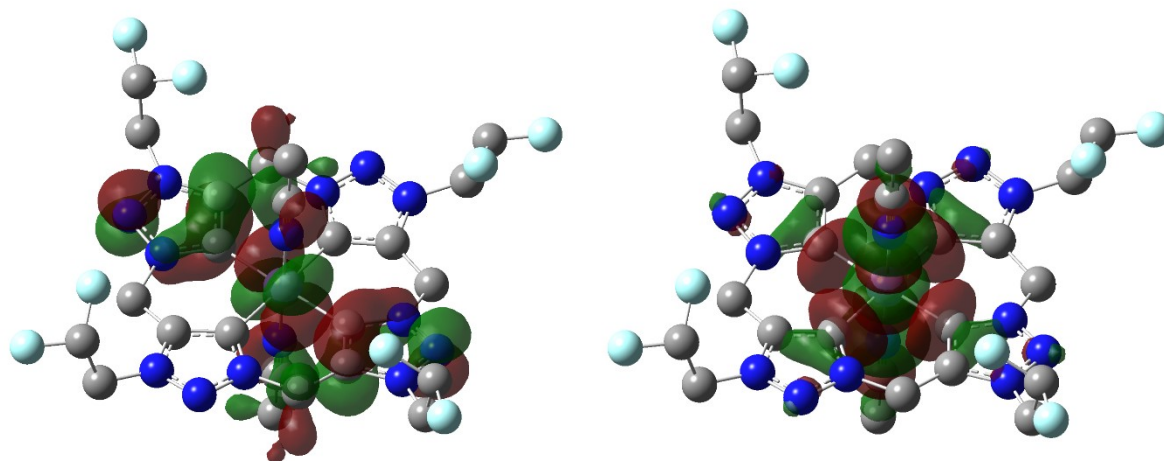

**Fig. S37** Isodensity plots of the  $\alpha$ -HOMO (SOMO) (left) and LUMO (right) of **2e**. Hydrogen atoms are omitted for clarity. All Isovalues MO = 0.02, Density = 0.0004 and Laplacian = 0.00.

**Table S8** Coordinates of **1** calculated by Gaussian (charge 2, multiplicity 1, SCF: E(gas phase) = -1665.863124 h, E(SMD) = -1666.082486 h, E(PCM) = -1666.051313 h).

| Atom | gas phase      |             |             | SMD            |             |             | PCM            |             |             |
|------|----------------|-------------|-------------|----------------|-------------|-------------|----------------|-------------|-------------|
|      | Coordinate [Å] |             |             | Coordinate [Å] |             |             | Coordinate [Å] |             |             |
|      | X              | Y           | Z           | X              | Y           | Z           | X              | Y           | Z           |
| Fe   | 0.00000827     | 0.00012856  | -0.00016860 | -0.00041092    | 0.00014538  | -0.00004514 | -0.00008195    | -0.00023426 | -0.00003870 |
| N    | -2.75611032    | 1.21482730  | -0.13780873 | 2.67575511     | 1.37308858  | -0.16250127 | -2.71372729    | 1.28885977  | -0.17650213 |
| N    | -3.44047293    | 2.35961498  | -0.08475030 | 3.99710629     | 1.17853511  | -0.11086128 | -3.36662549    | 2.45325980  | -0.11077859 |
| N    | -2.50681075    | 3.27334837  | 0.09481499  | 4.11345369     | -0.12152351 | 0.09387009  | -2.40801642    | 3.33369897  | 0.11547156  |
| N    | 1.21482630     | 2.75610716  | 0.14018992  | 1.37243688     | -2.67556022 | 0.17123846  | 1.28892709     | 2.71347158  | 0.17542278  |
| N    | 2.35969068     | 3.44042902  | 0.08817802  | 1.17810054     | -3.99703432 | 0.12182171  | 2.45338842     | 3.36632581  | 0.11019711  |
| N    | 3.27339681     | 2.50690121  | -0.09225435 | -0.12178249    | -4.11391694 | -0.08374581 | 3.33395097     | 2.40759489  | -0.11505197 |
| N    | 0.00153300     | -0.00148067 | 1.88328881  | -0.00578398    | 0.00369053  | 1.87797078  | -0.00151048    | 0.00032757  | 1.87595918  |
| C    | -3.53516353    | -0.00653652 | -0.39143726 | 2.21262663     | 2.74059907  | -0.44075495 | -3.50614139    | 0.09118204  | -0.49210601 |
| C    | -1.38613527    | 1.34266893  | 0.00261603  | 1.91466612     | 0.23461018  | 0.00324492  | -1.34825343    | 1.37494814  | 0.00078955  |
| C    | -1.24732478    | 2.72724785  | 0.15488903  | 2.89809334     | -0.74777268 | 0.17324753  | -1.16976368    | 2.75009003  | 0.19203252  |
| C    | -2.89384791    | 4.68043665  | 0.20835317  | 5.44077187     | -0.71710714 | 0.21385554  | -2.74912487    | 4.74691621  | 0.26219980  |
| C    | -0.00656078    | 3.53512635  | 0.39382478  | 2.73964162     | -2.21162394 | 0.44958620  | 0.09110120     | 3.50596084  | 0.49026744  |
| C    | 1.34258355     | 1.38628997  | -0.00171115 | 0.23401330     | -1.91493131 | 0.00311181  | 1.37510439     | 1.34792475  | -0.00127179 |
| C    | 2.72719955     | 1.24753698  | -0.15388843 | -0.74808199    | -2.89878839 | -0.16606044 | 2.75037876     | 1.16931249  | -0.19142139 |
| C    | 4.68057592     | 2.89393586  | -0.20464612 | -0.71719181    | -5.44147769 | -0.20170730 | 4.74728017     | 2.74857374  | -0.26098176 |
| C    | 0.00283444     | -0.00341851 | 3.05168333  | -0.01079300    | 0.00677561  | 3.04649423  | -0.00295845    | 0.00110644  | 3.04399742  |
| C    | 0.00457270     | -0.00684417 | 4.50855733  | -0.02004518    | 0.00845131  | 4.49960104  | -0.00660111    | 0.00264890  | 4.49954440  |
| H    | -3.89720285    | 0.03296255  | -1.43772378 | 2.43531149     | 2.97019548  | -1.50030369 | -3.77944078    | 0.13525345  | -1.56401343 |
| H    | -4.42872788    | 0.02905549  | 0.25652115  | 2.80997490     | 3.43286530  | 0.17635602  | -4.44375604    | 0.14819412  | 0.08592500  |
| H    | -2.56773847    | 5.07673022  | 1.18376822  | 5.53867665     | -1.19236429 | 1.20322632  | -2.44610776    | 5.09775048  | 1.26144577  |
| H    | -3.98786721    | 4.73959338  | 0.12690395  | 6.18542639     | 0.08247139  | 0.09928558  | -3.83552527    | 4.84902268  | 0.14021961  |
| H    | -2.42617413    | 5.25931086  | -0.60496248 | 5.57043130     | -1.47514151 | -0.57537739 | -2.22699611    | 5.33252295  | -0.51107206 |
| H    | 0.02896368     | 4.42865798  | -0.25418937 | 3.43255874     | -2.81086696 | -0.16493604 | 0.14843849     | 4.44352284  | -0.08780676 |
| H    | 0.03305251     | 3.89728369  | 1.44006625  | 2.96813394     | -2.43103324 | 1.51007090  | 0.13460094     | 3.77934933  | 1.56218861  |
| H    | 5.25890744     | 2.42567399  | 0.60872235  | -1.47609377    | -5.56958060 | 0.58694105  | 5.33233964     | 2.22668078  | 0.51286392  |
| H    | 4.73975638     | 3.98788786  | -0.12234863 | 0.08227035     | -6.18589201 | -0.08480054 | 4.84937700     | 3.83501082  | -0.13932842 |
| H    | 5.07748746     | 2.56849152  | -1.18003347 | -1.19139035    | -5.54137402 | -1.19139099 | 5.09875878     | 2.44516765  | -1.25988471 |
| H    | -0.87332646    | -0.55433736 | 4.89611951  | 0.12098339     | 1.03544458  | 4.88219365  | -0.90146509    | -0.51957536 | 4.88178536  |
| H    | -0.02986320    | 1.02605162  | 4.89922783  | 0.79458759     | -0.62878056 | 4.88864025  | -0.01342219    | 1.03863567  | 4.88207737  |
| H    | 0.91831524     | -0.49367923 | 4.89418657  | -0.98339011    | -0.38004585 | 4.87660971  | 0.89198674     | -0.50960849 | 4.88645219  |
| N    | 2.75603573     | -1.21459405 | -0.14173069 | -2.67590816    | -1.37315809 | -0.17014659 | 2.71375329     | -1.28938451 | -0.17320969 |
| N    | 3.44043907     | -2.35940558 | -0.08985686 | -3.99743594    | -1.17868210 | -0.12257945 | 3.36654344     | -2.45382476 | -0.10701753 |
| N    | 2.50692746     | -3.27323663 | 0.09003211  | -4.11450877    | 0.12173855  | 0.07949260  | 2.40768647     | -3.33424347 | 0.11824779  |
| N    | -1.21461045    | -2.75600595 | 0.13931200  | -1.37378495    | 2.67608591  | 0.16132857  | -1.28931854    | -2.71399003 | 0.17428763  |

|   |             |             |             |             |             |             |             |             |             |
|---|-------------|-------------|-------------|-------------|-------------|-------------|-------------|-------------|-------------|
| N | -2.35940153 | -3.44040898 | 0.08696310  | -1.17909318 | 3.99749678  | 0.11167370  | -2.45370587 | -3.36682310 | 0.10770924  |
| N | -3.27326725 | -2.50678026 | -0.09208356 | 0.12150159  | 4.11406205  | -0.08952938 | -3.33400813 | -2.40809801 | -0.11857660 |
| C | 3.53493184  | 0.00701216  | -0.39467500 | -2.21168297 | -2.74115339 | -0.44418542 | 3.50652631  | -0.09174717 | -0.48811459 |
| C | 1.38619870  | -1.34248923 | -0.00020877 | -1.91545028 | -0.23432812 | -0.00400839 | 1.34811484  | -1.37543007 | 0.00288380  |
| C | 1.24750245  | -2.72715707 | 0.15145814  | -2.89945984 | 0.74824126  | 0.16141347  | 1.16938693  | -2.75059790 | 0.19372541  |
| C | 2.89403500  | -4.68041295 | 0.20224450  | -5.44219208 | 0.71741821  | 0.19473635  | 2.74853887  | -4.74751596 | 0.26499535  |
| C | 0.00699162  | -3.53497971 | 0.39202494  | -2.74205526 | 2.21264777  | 0.43534476  | -0.09182483 | -3.50666750 | 0.48997999  |
| C | -1.34256781 | -1.38605310 | -0.00115561 | -0.23489854 | 1.91518775  | -0.00248822 | -1.37527478 | -1.34843934 | -0.00251369 |
| C | -2.72724417 | -1.24728218 | -0.15251652 | 0.74795136  | 2.89879129  | -0.16867162 | -2.75032292 | -1.16983703 | -0.19437164 |
| C | -4.68041009 | -2.89386518 | -0.20484915 | 0.71735695  | 5.44152002  | -0.20659791 | -4.74717830 | -2.74908007 | -0.26602263 |
| H | 4.42891421  | -0.02923938 | 0.25266568  | -2.81140445 | -3.43231122 | 0.17186199  | 4.44351641  | -0.14864936 | 0.09093840  |
| H | 3.89626214  | -0.03151906 | -1.44123384 | -2.43017581 | -2.97276064 | -1.50416571 | 3.78099652  | -0.13599850 | -1.55971039 |
| H | 2.42627767  | -5.25856996 | -0.61153666 | -5.56949593 | 1.47449473  | -0.59579328 | 2.22701208  | -5.33290634 | -0.50884838 |
| H | 3.98803553  | -4.73946807 | 0.12054363  | -6.18649697 | -0.08230367 | 0.07892907  | 3.83503267  | -4.84971405 | 0.14393743  |
| H | 2.56807799  | -5.07760025 | 1.17734678  | -5.54307808 | 1.19391615  | 1.18321628  | 2.44460826  | -5.09852852 | 1.26390267  |
| H | -0.03143263 | -3.89648769 | 1.43852533  | -2.97466313 | 2.43433083  | 1.49442948  | -0.13661852 | -3.78096019 | 1.56158743  |
| H | -0.02930310 | -4.42882028 | -0.25550715 | -3.43261583 | 2.81051719  | -0.18317989 | -0.14842023 | -4.44375704 | -0.08895106 |
| H | -5.07737296 | -2.56723601 | -1.17981394 | 1.19490500  | 5.54057115  | -1.19475245 | -5.09758912 | -2.44564750 | -1.26529101 |
| H | -4.73942475 | -3.98793005 | -0.12395648 | -0.08247524 | 6.18604870  | -0.09300224 | -4.84939505 | -3.83552226 | -0.14451234 |
| H | -5.25876826 | -2.42669218 | 0.60912278  | 1.47357202  | 5.57025768  | 0.58452847  | -5.33307721 | -2.22722154 | 0.50721160  |
| N | -0.00161426 | 0.00147827  | -1.88362853 | 0.00498592  | -0.00320904 | -1.87804854 | 0.00115185  | -0.00016773 | -1.87603476 |
| C | -0.00315487 | 0.00296272  | -3.05202278 | 0.01044318  | -0.00604755 | -3.04657311 | 0.00245609  | 0.00046010  | -3.04407396 |
| C | -0.00546432 | 0.00474875  | -4.50889814 | 0.02909405  | -0.01168512 | -4.49958556 | 0.00933858  | 0.00256599  | -4.49961045 |
| H | 0.87119876  | 0.55340194  | -4.89761364 | -0.10922930 | -1.03977199 | -4.88029091 | 0.90439805  | 0.52686642  | -4.87855181 |
| H | 0.02909292  | -1.02862347 | -4.89819755 | -0.78283216 | 0.62446604  | -4.89579809 | 0.01780503  | -1.03219361 | -4.88527411 |
| H | -0.91859954 | 0.49263455  | -4.89473492 | 0.99505076  | 0.37561167  | -4.87122664 | -0.88904586 | 0.51510119  | -4.88671949 |

**Table S9** Coordinates of **2** calculated by Gaussian (charge 3, multiplicity 2, SCF: E(gas phase) = -1665.458341 h, E(SMD) = -1665.919714 h, E(PCM) = -1665.875881 h).

| Atom | gas phase<br>Coordinate [Å] |             |             | SMD<br>Coordinate [Å] |             |             | PCM<br>Coordinate [Å] |             |             |
|------|-----------------------------|-------------|-------------|-----------------------|-------------|-------------|-----------------------|-------------|-------------|
|      | X                           | Y           | Z           | X                     | Y           | Z           | X                     | Y           | Z           |
| Fe   | 0.00000000                  | 0.00000000  | 0.00000000  | 0.00000000            | 0.00000000  | 0.00000000  | -0.00049448           | 0.00009153  | 0.00003395  |
| C    | -1.67298132                 | 2.35144905  | -2.14175802 | -1.67832598           | 2.35386316  | -2.12112066 | 1.31245405            | -3.27407833 | 0.44633413  |
| H    | -2.74528566                 | 2.61990178  | -2.11508002 | -2.74626191           | 2.63108342  | -2.07688338 | 1.62055326            | -4.13515172 | -0.16840348 |
| H    | -1.23021358                 | 2.88798771  | -3.00128619 | -1.22967868           | 2.89531272  | -2.97281820 | 1.39251476            | -3.57393455 | 1.50756967  |
| C    | -0.98254973                 | -0.09519144 | -1.70516570 | -0.97713589           | -0.08177577 | -1.70480979 | -0.74214263           | -1.81071431 | -0.00085846 |
| C    | -1.23253627                 | -1.22878268 | -2.47528337 | -1.23561731           | -1.21821157 | -2.46756556 | -2.07501378           | -2.16904111 | -0.17358959 |
| C    | -2.46581940                 | -1.60590272 | -4.69070030 | -2.51130370           | -1.61765583 | -4.62972607 | -3.27877133           | -4.41557486 | -0.23470885 |
| H    | -2.98707824                 | -0.92778501 | -5.38065374 | -3.03194180           | -0.95158173 | -5.33092621 | -2.93359888           | -5.45184840 | -0.12675494 |
| H    | -3.16717228                 | -2.36342992 | -4.30477650 | -3.20979530           | -2.36014873 | -4.21218563 | -3.73536970           | -4.26741126 | -1.22513654 |
| H    | -1.62372826                 | -2.09480619 | -5.20690529 | -1.67687671           | -2.13095883 | -5.13304785 | -4.00583740           | -4.17285536 | 0.55588793  |
| C    | -0.85174332                 | -2.66277674 | -2.25816148 | -0.84263695           | -2.64626907 | -2.26931614 | -3.27373237           | -1.31214961 | -0.44769768 |
| H    | -1.74754313                 | -3.30871865 | -2.20340966 | -1.73705841           | -3.29292181 | -2.23302865 | -3.56880884           | -1.39017686 | -1.51040276 |
| H    | -0.23445939                 | -3.04214039 | -3.09342474 | -0.21519370           | -2.99541425 | -3.10875951 | -4.13741271           | -1.62124880 | 0.16280732  |
| C    | 0.30568805                  | -1.94530948 | -0.06747191 | 0.30424711            | -1.94057604 | -0.08267304 | -1.81134149           | 0.74191232  | 0.00410253  |
| C    | 0.98995947                  | -2.72684197 | 0.86074564  | 0.99029709            | -2.71908369 | 0.84624823  | -2.16991373           | 2.07461677  | 0.17763009  |
| C    | 1.51795323                  | -5.23180450 | 0.99324265  | 1.51262362            | -5.19956443 | 1.00120414  | -4.41773566           | 3.27689732  | 0.24037042  |
| H    | 1.28369981                  | -6.08075307 | 0.33597161  | 1.32680979            | -6.05232540 | 0.33460306  | -5.45386673           | 2.92980057  | 0.13737413  |
| H    | 1.06998159                  | -5.39001017 | 1.98768632  | 1.02680178            | -5.35960793 | 1.97697552  | -4.17980657           | 4.00299665  | -0.55254047 |
| H    | 2.61014614                  | -5.11400189 | 1.08221360  | 2.59444694            | -5.04837457 | 1.14319942  | -4.26651230           | 3.73510481  | 1.22955651  |
| C    | 2.62413200                  | 0.46455327  | -1.53677851 | 2.63033837            | 0.46618629  | -1.48434023 | 0.00606638            | 0.00304888  | 3.05548782  |
| C    | 3.86466710                  | 0.68463863  | -2.26210716 | 3.88302015            | 0.68609508  | -2.17777022 | 0.01240553            | 0.00259241  | 4.50634674  |
| H    | 3.99501634                  | -0.08942936 | -3.03965431 | 4.00884966            | -0.07144656 | -2.97135001 | -0.99260921           | -0.25033257 | 4.88545940  |
| H    | 4.72466067                  | 0.64009239  | -1.56985571 | 4.72263725            | 0.60801532  | -1.46460862 | 0.29821605            | 1.00110870  | 4.87925505  |
| H    | 3.85194680                  | 1.67677971  | -2.74816095 | 3.88679125            | 1.69217472  | -2.63286001 | 0.73730334            | -0.74208823 | 4.87745822  |
| N    | -1.58474351                 | 0.90668133  | -2.42801963 | -1.59974722           | 0.91407648  | -2.41068532 | -0.10967463           | -3.01449848 | 0.15984879  |
| N    | -2.16817868                 | 0.49203508  | -3.54886554 | -2.20592827           | 0.49611598  | -3.51871121 | -0.92252794           | -4.06566463 | 0.09686681  |
| N    | -1.95107765                 | -0.80359464 | -3.57129651 | -1.97881928           | -0.80086372 | -3.54114030 | -2.11355571           | -3.54003410 | -0.10363871 |
| N    | -0.08452945                 | -2.86253135 | -1.01373819 | -0.08568218           | -2.85451178 | -1.02606453 | -3.01497334           | 0.10927187  | -0.15728917 |
| N    | 0.29413649                  | -4.10969283 | -0.74947911 | 0.29392570            | -4.10221431 | -0.76217162 | -4.06629362           | 0.92169033  | -0.09379188 |

|   |             |             |             |             |             |             |             |             |             |
|---|-------------|-------------|-------------|-------------|-------------|-------------|-------------|-------------|-------------|
| N | 0.94518407  | -4.02034306 | 0.38824082  | 0.94561176  | -4.00611168 | 0.37798320  | -3.54106079 | 2.11273392  | 0.10754943  |
| N | 1.63022441  | 0.28837795  | -0.95523353 | 1.62648298  | 0.28899747  | -0.92482966 | 0.00260012  | 0.00234149  | 1.89298690  |
| C | 1.67298132  | -2.35144905 | 2.14175802  | 1.67832598  | -2.35386316 | 2.12112066  | -1.31258784 | 3.27396196  | 0.44853051  |
| H | 2.74528566  | -2.61990178 | 2.11508002  | 2.74626191  | -2.63108342 | 2.07688338  | -1.38896289 | 3.57181861  | 1.51055025  |
| H | 1.23021358  | -2.88798771 | 3.00128619  | 1.22967868  | -2.89531272 | 2.97281820  | -1.62217903 | 4.13640483  | -0.16349413 |
| C | 0.98254973  | 0.09519144  | 1.70516570  | 0.97713589  | 0.08177577  | 1.70480979  | 0.74124621  | 1.81091390  | -0.00316852 |
| C | 1.23253627  | 1.22878268  | 2.47528337  | 1.23561731  | 1.21821157  | 2.46756556  | 2.07386431  | 2.16928879  | -0.17730946 |
| C | 2.46581940  | 1.60590272  | 4.69070030  | 2.51130370  | 1.61765583  | 4.62972607  | 3.27711385  | 4.41610202  | -0.24182493 |
| H | 2.98707824  | 0.92778501  | 5.38065374  | 3.03194180  | 0.95158173  | 5.33092621  | 2.93247085  | 5.45223369  | -0.13086639 |
| H | 3.16717228  | 2.36342992  | 4.30477650  | 3.20979530  | 2.36014873  | 4.21218563  | 4.00681665  | 4.17162228  | 0.54580420  |
| H | 1.62372826  | 2.09480619  | 5.20690529  | 1.67687671  | 2.13095883  | 5.13304785  | 3.73055356  | 4.26976008  | -1.23395799 |
| C | 0.85174332  | 2.66277674  | 2.25816148  | 0.84263695  | 2.64626907  | 2.26931614  | 3.27222573  | 1.31217394  | -0.45212631 |
| H | 1.74754313  | 3.30871865  | 2.20340966  | 1.73705841  | 3.29292181  | 2.23302865  | 4.13652544  | 1.62172403  | 0.15726052  |
| H | 0.23445939  | 3.04214039  | 3.09342474  | 0.21519370  | 2.99541425  | 3.10875951  | 3.56624325  | 1.38959770  | -1.51518098 |
| C | -0.30568805 | 1.94530948  | 0.06747191  | -0.30424711 | 1.94057604  | 0.08267304  | 1.81007630  | -0.74191067 | 0.00041833  |
| C | -0.98959547 | 2.72684197  | -0.86074564 | -0.99029709 | 2.71908369  | -0.84624823 | 2.16885527  | -2.07438917 | 0.17480296  |
| C | -1.51795323 | 5.23180450  | -0.99324265 | -1.51262362 | 5.19956443  | -1.00120414 | 4.41656144  | -3.27647533 | 0.23962530  |
| H | -1.28369981 | 6.08075307  | -0.33597161 | -1.32680979 | 6.05232540  | -0.33460306 | 5.45261099  | -2.93015918 | 0.13303306  |
| H | -1.06998159 | 5.39001017  | -1.98768632 | -1.02680178 | 5.35960793  | -1.97697552 | 4.26760043  | -3.73203350 | 1.23039470  |
| H | -2.61014614 | 5.11400189  | -1.08221360 | -2.59444694 | 5.04837457  | -1.14319942 | 4.17614674  | -4.00485018 | -0.55043912 |
| N | 1.58474351  | -0.90668133 | 2.42801963  | 1.59974722  | -0.91407648 | 2.41068532  | 0.10863885  | 3.01471587  | 0.15700996  |
| N | 2.16817868  | -0.49203508 | 3.54886554  | 2.20592827  | -0.49611598 | 3.51871121  | 0.92130724  | 4.06596716  | 0.09274842  |
| N | 1.95107765  | 0.80359464  | 3.57129651  | 1.97881928  | 0.80086372  | 3.54114030  | 2.11224305  | 3.54039679  | -0.10861507 |
| N | 0.08452945  | 2.86253135  | 1.01373819  | 0.08568218  | 2.85451178  | 1.02606453  | 3.01369698  | -0.10902641 | -0.16024318 |
| N | -0.29413649 | 4.10969283  | 0.74947911  | -0.29392570 | 4.10221431  | 0.76217162  | 4.06516174  | -0.92126537 | -0.09582640 |
| N | -0.94518407 | 4.02034306  | -0.38824082 | -0.94561176 | 4.00611168  | -0.37798320 | 3.54003529  | -2.11232078 | 0.10574850  |
| C | -2.62413200 | -0.46455327 | 1.53677851  | -2.63033837 | -0.46618629 | 1.48434023  | -0.00390084 | -0.00343901 | -3.05542254 |
| C | -3.86466710 | -0.68463863 | 2.26210716  | -3.88302015 | -0.68609508 | 2.17777022  | 0.00019893  | -0.00584400 | -4.50626861 |
| H | -3.99501634 | 0.08942936  | 3.03965431  | -4.00884966 | 0.07144656  | 2.97135001  | 1.03212479  | 0.11655494  | -4.87755750 |
| H | -4.72466067 | -0.64009239 | 1.56985571  | -4.72263725 | -0.60801532 | 1.46460862  | -0.40739630 | -0.96068742 | -4.88024401 |
| H | -3.85194680 | -1.67677971 | 2.74816095  | -3.88679125 | -1.69217472 | 2.63286001  | -0.62086087 | 0.82410928  | -4.88452737 |
| N | -1.63022441 | -0.28837795 | 0.95523353  | -1.62648298 | -0.28899747 | 0.92482966  | -0.00405042 | -0.00141898 | -1.89304460 |

**Table S10** Coordinates of 1-MeCN calculated by Gaussian (charge 2, multiplicity 1, SCF: E(gas phase) = -1533.242747 h, E(SMD) = -1533.471750 h, E(PCM) = -1533.438315 h).

| Atom | gas phase      |             |             | SMD            |             |             | PCM            |             |             |
|------|----------------|-------------|-------------|----------------|-------------|-------------|----------------|-------------|-------------|
|      | Coordinate [Å] |             |             | Coordinate [Å] |             |             | Coordinate [Å] |             |             |
|      | X              | Y           | Z           | X              | Y           | Z           | X              | Y           | Z           |
| Fe   | -0.00019963    | 0.00007354  | 0.01717425  | -0.00042861    | 0.00049508  | -0.06509939 | 0.00017580     | 0.00006028  | -0.08211227 |
| N    | 1.41721203     | -2.65346985 | -0.37391476 | 1.50680896     | -2.60657026 | -0.38556067 | 1.44494319     | -2.63267020 | -0.43088924 |
| N    | 2.61043686     | -3.22656972 | -0.50862084 | 2.72442585     | -3.14245592 | -0.46148661 | 2.64954604     | -3.20048349 | -0.47286269 |
| N    | 3.45957247     | -2.22768626 | -0.37417630 | 3.53401495     | -2.10874012 | -0.32121834 | 3.47987703     | -2.19399758 | -0.27017444 |
| N    | 2.66477806     | 1.40992822  | -0.18151084 | 2.61595914     | 1.50181137  | -0.18710634 | 2.64288101     | 1.43746272  | -0.13766932 |
| N    | 3.25725068     | 2.57887491  | -0.40134175 | 3.16514529     | 2.70248393  | -0.35755842 | 3.23019979     | 2.61791086  | -0.31658970 |
| N    | 2.25274149     | 3.42351184  | -0.52559895 | 2.12679038     | 3.50818581  | -0.48747396 | 2.21925283     | 3.44452798  | -0.51369072 |
| C    | 0.25861216     | -3.54923221 | -0.47021705 | 0.37810051     | -3.53342223 | -0.51714871 | 0.29499996     | -3.51508759 | -0.66541452 |
| C    | 1.44096447     | -1.28320650 | -0.14968044 | 1.48145496     | -1.23453503 | -0.19637997 | 1.44916606     | -1.26659961 | -0.20520155 |
| C    | 2.82146577     | -1.03292171 | -0.15895683 | 2.85182027     | -0.93504372 | -0.16028906 | 2.82256424     | -1.00478372 | -0.10448728 |
| C    | 4.89753170     | -2.49147647 | -0.47314992 | 4.97950524     | -2.31086325 | -0.34893163 | 4.91930287     | -2.44690901 | -0.23405005 |
| C    | 3.54034119     | 0.25942436  | 0.06958494  | 3.52852332     | 0.37984941  | 0.05832592  | 3.50533258     | 0.29490329  | 0.18802975  |
| C    | 1.27661431     | 1.44269479  | -0.15275482 | 1.23057270     | 1.48192827  | -0.19994985 | 1.26002350     | 1.45074416  | -0.21081947 |
| C    | 1.03509354     | 2.80426977  | -0.38590015 | 0.93684889     | 2.83831877  | -0.40038208 | 1.00736812     | 2.80618665  | -0.46011549 |
| C    | 2.52881857     | 4.83604321  | -0.79665865 | 2.33427350     | 4.93614015  | -0.70700396 | 2.48356649     | 4.85821829  | -0.77374832 |
| H    | 0.33910836     | -4.29553472 | 0.34318545  | 0.47724949     | -4.30839251 | 0.26471908  | 0.38853802     | -4.37906259 | 0.01573764  |
| H    | 0.34134338     | -4.10557241 | -1.42228575 | 0.46518776     | -4.04495204 | -1.49319895 | 0.37122487     | -3.90634776 | -1.69702248 |
| H    | 5.31514620     | -1.94295150 | -1.33337712 | 5.40809359     | -1.75265062 | -1.19692105 | 5.41828057     | -1.83152191 | -0.99898031 |
| H    | 5.03356626     | -3.57188186 | -0.61867815 | 5.17207238     | -3.38610344 | -0.46494957 | 5.08003418     | -3.51212975 | -0.44565666 |
| H    | 5.39619144     | -2.17132467 | 0.45581520  | 5.41479990     | -1.94377182 | 0.59408198  | 5.31269896     | -2.19523872 | 0.76330822  |
| H    | 3.90264379     | 0.32603156  | 1.11467491  | 3.89606962     | 0.45474097  | 1.09975405  | 3.76854773     | 0.35845582  | 1.26139593  |
| H    | 4.42123686     | 0.36382609  | -0.58588936 | 4.39886402     | 0.49910281  | -0.60783473 | 4.43902675     | 0.40617501  | -0.38623669 |
| H    | 2.09967134     | 5.11592960  | -1.77276412 | 1.87886112     | 5.22513402  | -1.66785328 | 2.15175748     | 5.11397240  | -1.79265165 |

|   |             |             |             |             |             |             |             |             |             |
|---|-------------|-------------|-------------|-------------|-------------|-------------|-------------|-------------|-------------|
| H | 3.61895490  | 4.97123458  | -0.81491945 | 3.41602350  | 5.12633434  | -0.72492515 | 3.56446309  | 5.02409755  | -0.67609065 |
| H | 2.08654135  | 5.45691961  | -0.00072542 | 1.86026801  | 5.50111146  | 0.11168397  | 1.93965531  | 5.47196824  | -0.03891618 |
| N | -1.41764339 | 2.65370021  | -0.37314165 | -1.50800228 | 2.60783752  | -0.38164530 | -1.44438550 | 2.63278136  | -0.43150672 |
| N | -2.61086063 | 3.22683581  | -0.50760600 | -2.72567126 | 3.14362300  | -0.45736815 | -2.64895936 | 3.20065470  | -0.47343966 |
| N | -3.46000392 | 2.22795708  | -0.37328804 | -3.53517080 | 2.10980335  | -0.31737915 | -3.47935020 | 2.19418345  | -0.27092701 |
| N | -2.66520205 | -1.40971277 | -0.18136057 | -2.61696475 | -1.50068304 | -0.18599288 | -2.64240550 | -1.43730465 | -0.13841414 |
| N | -3.25770125 | -2.57869305 | -0.40092952 | -3.16628699 | -2.70123764 | -0.35676062 | -3.22966646 | -2.61783921 | -0.31695676 |
| N | -2.25321025 | -3.42330061 | -0.52543357 | -2.12805700 | -3.50679944 | -0.48847916 | -2.21867483 | -3.44448065 | -0.51372960 |
| C | -0.25908160 | 3.54950700  | -0.46944763 | -0.37942935 | 3.53490738  | -0.51301310 | -0.29437769 | 3.51516132  | -0.66581862 |
| C | -1.44138167 | 1.28338120  | -0.14919566 | -1.48251374 | 1.23571117  | -0.19297433 | -1.44868811 | 1.26666621  | -0.20609976 |
| C | -2.82188572 | 1.03313479  | -0.15839331 | -2.85285617 | 0.93612081  | -0.15683431 | -2.82209381 | 1.00491509  | -0.10538542 |
| C | -4.89796686 | 2.49184095  | -0.47190170 | -4.98067890 | 2.31180240  | -0.34540046 | -4.91875960 | 2.44717221  | -0.23472411 |
| C | -3.54075309 | -0.25924959 | 0.06987796  | -3.52931941 | -0.37895717 | 0.06133369  | -3.50484920 | -0.29474072 | 0.18724414  |
| C | -1.27702860 | -1.44243186 | -0.15301057 | -1.23158498 | -1.48071183 | -0.20045079 | -1.25955237 | -1.45054763 | -0.21157492 |
| C | -1.03554228 | -2.80400621 | -0.38618151 | -0.93804497 | -2.83694344 | -0.40227797 | -1.00681666 | -2.80606644 | -0.46032869 |
| C | -2.52932807 | -4.83590419 | -0.79606509 | -2.33574783 | -4.93459899 | -0.70882584 | -2.48292322 | -4.85828850 | -0.77321869 |
| H | -0.34202752 | 4.10611659  | -1.42133709 | -0.46751252 | 4.04779751  | -1.48825119 | -0.37020389 | 3.90617815  | -1.69754978 |
| H | -0.33944421 | 4.29556920  | 0.34419059  | -0.47783035 | 4.30879009  | 0.27003532  | -0.38819885 | 4.37929154  | 0.01509476  |
| H | -5.39634284 | 2.17227820  | 0.45742154  | -5.41621815 | 1.94435295  | 0.59735571  | -5.31210057 | 2.19560533  | 0.76268449  |
| H | -5.03392768 | 3.57218112  | -0.61797573 | -5.17330517 | 3.38706261  | -0.46113361 | -5.07945378 | 3.51238391  | -0.44640547 |
| H | -5.31594150 | 1.94288410  | -1.33167485 | -5.40895879 | 1.75384013  | -1.19371522 | -5.41781859 | 1.83174595  | -0.99956880 |
| H | -4.42164363 | -0.36352722 | -0.58562836 | -4.40035071 | -0.49767741 | -0.60400679 | -4.43861147 | -0.40606296 | -0.38690415 |
| H | -3.90316705 | -0.32606787 | 1.11493062  | -3.89575645 | -0.45476707 | 1.10310341  | -3.76796240 | -0.35822065 | 1.26066634  |
| H | -2.08723480 | -5.45652601 | 0.00017144  | -1.86109043 | -5.50015148 | 0.10908662  | -1.93908295 | -5.47170482 | -0.03805550 |
| H | -3.61946931 | -4.97103283 | -0.81445411 | -3.41751562 | -5.12476084 | -0.72598456 | -3.56382635 | -5.02415234 | -0.67560611 |
| H | -2.10003418 | -5.11614315 | -1.77200221 | -1.88113584 | -5.22293898 | -1.67024767 | -2.15098865 | -5.11447677 | -1.79197080 |
| N | 0.00052810  | -0.00040507 | 1.83060489  | 0.00165289  | -0.00159808 | 1.74271074  | -0.00083529 | -0.00004683 | 1.72508336  |
| C | 0.00164061  | -0.00089152 | 3.00052143  | 0.00406158  | -0.00399484 | 2.91370461  | -0.00198286 | -0.00029348 | 2.89495761  |
| C | 0.00388379  | -0.00179154 | 4.45700392  | 0.00959337  | -0.01034384 | 4.36699560  | -0.00432653 | -0.00119134 | 4.34983835  |
| H | 0.48001871  | 0.91677679  | 4.84511127  | 0.48055589  | 0.91149623  | 4.75455441  | 0.49079839  | 0.90735690  | 4.73656972  |
| H | -1.02887779 | -0.04918748 | 4.84723102  | -1.02353836 | -0.06770342 | 4.75577981  | -1.03997779 | -0.02624957 | 4.73334964  |
| H | 0.56160156  | -0.87381072 | 4.84382498  | 0.57632617  | -0.88057278 | 4.74569727  | 0.53394692  | -0.88527456 | 4.73559624  |

**Table S11** Coordinates of 2-MeCN calculated by Gaussian (charge 3, multiplicity 2, SCF: E(gas phase) = -1532.819601 h, E(SMD) = -1533.302759 h, E(PCM) = -1533.253453 h).

| Atom | gas phase<br>Coordinate [Å] |             |             | SMD<br>Coordinate [Å] |             |             | PCM<br>Coordinate [Å] |             |             |
|------|-----------------------------|-------------|-------------|-----------------------|-------------|-------------|-----------------------|-------------|-------------|
|      | X                           | Y           | Z           | X                     | Y           | Z           | X                     | Y           | Z           |
| Fe   | 0.03817481                  | -0.00795896 | 0.14085880  | -0.03700280           | 0.00308035  | -0.09184646 | 0.04108500            | 0.00736900  | -0.05968500 |
| N    | -2.93537692                 | -0.52839403 | -0.30141730 | 2.95581771            | 0.44715172  | -0.23044064 | -2.68384900           | -1.29429500 | -0.22893900 |
| N    | -3.83807823                 | -1.46062952 | -0.55852588 | 3.90206048            | 1.36409437  | -0.37666199 | -3.32083500           | -2.44050000 | -0.41155800 |
| N    | -3.15593832                 | -2.58474959 | -0.58751133 | 3.23956034            | 2.49836931  | -0.49616364 | -2.35714200           | -3.32751300 | -0.56036400 |
| N    | 0.55275937                  | -2.99152405 | -0.29506819 | -0.47106862           | 3.00031973  | -0.38934905 | 1.33985500            | -2.72234100 | -0.38977000 |
| N    | 1.51127426                  | -3.88084877 | -0.48587477 | -1.41323639           | 3.93166473  | -0.42718451 | 2.51241600            | -3.33644200 | -0.42373500 |
| N    | 2.62927287                  | -3.19115501 | -0.40542259 | -2.54003959           | 3.26478393  | -0.26744955 | 3.39231000            | -2.37472500 | -0.22792000 |
| C    | -3.43495881                 | 0.84689519  | -0.16438541 | 3.39220865            | -0.93866641 | -0.01606615 | -3.50083500           | -0.10424900 | 0.04495900  |
| C    | -1.64272329                 | -1.00190531 | -0.16703264 | 1.67468813            | 0.94634719  | -0.26392040 | -1.31157300           | -1.39415000 | -0.26956200 |
| C    | -1.81710164                 | -2.37674972 | -0.36078624 | 1.88443007            | 2.31503471  | -0.43987417 | -1.11275000           | -2.75799400 | -0.48501700 |
| C    | -3.85464627                 | -3.85044668 | -0.86364587 | 3.96368977            | 3.75512454  | -0.67285312 | -2.69192600           | -4.73254400 | -0.79767900 |
| C    | -0.82757201                 | -3.49561569 | -0.31338408 | 0.91758834            | 3.44621040  | -0.56124850 | 0.14717000            | -3.54934300 | -0.62181100 |
| C    | 1.00125718                  | -1.69995514 | -0.09061459 | -0.94821204           | 1.72309105  | -0.22006140 | 1.41829100            | -1.36478800 | -0.18411000 |
| C    | 2.39054392                  | -1.85787993 | -0.17426286 | -2.32958720           | 1.91783658  | -0.14254832 | 2.79467800            | -1.15007300 | -0.08202100 |
| C    | 3.91894813                  | -3.87952160 | -0.58155601 | -3.81512639           | 3.98046113  | -0.25187595 | 4.82029100            | -2.69743900 | -0.19007700 |
| H    | -3.93746352                 | 0.93145141  | 0.81918072  | 3.78127133            | -1.01692903 | 1.01631057  | -3.83457300           | -0.15904200 | 1.09814600  |
| H    | -4.20864289                 | 0.99670585  | -0.93657557 | 4.22861805            | -1.13955539 | -0.70479031 | -4.39643500           | -0.16182700 | -0.59294900 |
| H    | -3.48219428                 | -4.27352455 | -1.81109473 | 3.65329361            | 4.21689191  | -1.62353256 | -2.34400500           | -5.02547100 | -1.80062900 |
| H    | -4.92803471                 | -3.62998434 | -0.94805844 | 5.03809791            | 3.52859742  | -0.68750723 | -3.78261000           | -4.83391900 | -0.72842600 |
| H    | -3.67715027                 | -4.55255987 | -0.03328413 | 3.72217607            | 4.42753072  | 0.16553541  | -2.20268600           | -5.35296300 | -0.03124800 |
| H    | -0.97750115                 | -4.12004665 | 0.58879561  | 1.12532569            | 4.22035222  | 0.19780123  | 0.16939500            | -4.38457900 | 0.09923100  |
| H    | -0.92638098                 | -4.16271403 | -1.18803504 | 1.00305123            | 3.92307735  | -1.55425988 | 0.23053600            | -3.98262100 | -1.63463500 |

|   |             |             |             |             |             |             |             |             |             |
|---|-------------|-------------|-------------|-------------|-------------|-------------|-------------|-------------|-------------|
| H | 4.42058393  | -3.48904385 | -1.48229169 | -4.42179553 | 3.65103214  | -1.11051990 | 5.34012800  | -2.13619300 | -0.98177000 |
| H | 3.71234417  | -4.95204311 | -0.70367094 | -3.60027978 | 5.05506955  | -0.32239762 | 4.92294600  | -3.77658800 | -0.36201600 |
| H | 4.54422587  | -3.71407598 | 0.31032720  | -4.34031766 | 3.75203666  | 0.68870392  | 5.22736600  | -2.42784200 | 0.79634800  |
| N | 2.99680332  | 0.52424650  | -0.17726136 | -3.00920773 | -0.44597949 | -0.14135294 | 2.74650100  | 1.30646700  | -0.09874100 |
| N | 3.90736711  | 1.45013240  | -0.42435623 | -3.96141234 | -1.35927251 | -0.26847195 | 3.39316300  | 2.44710200  | -0.28049200 |
| N | 3.23120519  | 2.57829481  | -0.47779132 | -3.30631646 | -2.49705945 | -0.39927611 | 2.43802700  | 3.33998300  | -0.44992400 |
| N | -0.48558611 | 2.97061561  | -0.32536897 | 0.41111830  | -2.99032055 | -0.39679201 | -1.26631300 | 2.73006000  | -0.41169900 |
| N | -1.43172781 | 3.86422708  | -0.56228536 | 1.34968148  | -3.92327658 | -0.47679996 | -2.43599700 | 3.34700300  | -0.48846800 |
| N | -2.55358242 | 3.17858512  | -0.53996284 | 2.48380498  | -3.25864106 | -0.37104032 | -3.32561900 | 2.38354000  | -0.35702800 |
| C | 3.48530473  | -0.85239365 | -0.01246294 | -3.43286459 | 0.93997412  | 0.09731523  | 3.54940100  | 0.11123300  | 0.19456800  |
| C | 1.70438174  | 1.01001617  | -0.05423050 | -1.73032734 | -0.95537382 | -0.18097430 | 1.37324900  | 1.42091600  | -0.13939700 |
| C | 1.89003307  | 2.37967551  | -0.26170242 | -1.94992509 | -2.32143021 | -0.35276480 | 1.18846100  | 2.78267100  | -0.37130900 |
| C | 3.94093094  | 3.83670139  | -0.76077170 | -4.03913487 | -3.75078477 | -0.56219604 | 2.78624600  | 4.73837000  | -0.70615200 |
| C | 0.88970936  | 3.48801369  | -0.25216129 | -0.98230821 | -3.44972216 | -0.48036789 | -0.06784100 | 3.57314900  | -0.53627100 |
| C | -0.95201893 | 1.68102598  | -0.13343262 | 0.89931932  | -1.71415612 | -0.23324256 | -1.35811600 | 1.36889600  | -0.22324700 |
| C | -2.33253384 | 1.84793301  | -0.28061033 | 2.28050713  | -1.91443290 | -0.21547618 | -2.73664400 | 1.15873000  | -0.18680600 |
| C | -3.82938692 | 3.86889410  | -0.79141123 | 3.75689785  | -3.97573076 | -0.42456627 | -4.75356900 | 2.70606700  | -0.39997900 |
| H | 4.29125144  | -1.00501261 | -0.75023715 | -4.29557726 | 1.14447607  | -0.55694203 | 4.46703000  | 0.17557100  | -0.41040300 |
| H | 3.94589392  | -0.93601887 | 0.99181560  | -3.78235214 | 1.01561540  | 1.14412287  | 3.84744600  | 0.15354200  | 1.25899600  |
| H | 3.74928611  | 4.55274912  | 0.05430767  | -3.78884786 | -4.42096702 | 0.27548105  | 2.28606500  | 5.37600700  | 0.03853500  |
| H | 5.01487107  | 3.61079706  | -0.81962623 | -5.11257763 | -3.51942018 | -0.56210801 | 3.87601400  | 4.83474800  | -0.61787000 |
| H | 3.58937331  | 4.24494281  | -1.72266182 | -3.74377992 | -4.21740233 | -1.51525014 | 2.45985000  | 5.01415900  | -1.72109900 |
| H | 1.03204898  | 4.17342971  | -1.10591649 | -1.11375969 | -3.96791200 | -1.44692280 | -0.10002100 | 4.05955600  | -1.52719800 |
| H | 0.97973020  | 4.09532152  | 0.66959054  | -1.14483616 | -4.19330839 | 0.31979281  | -0.13561600 | 4.36865600  | 0.22632600  |
| H | -4.50759780 | 3.70243943  | 0.06061475  | 4.32471026  | -3.76424940 | 0.49499615  | -5.22221400 | 2.40861200  | 0.55021600  |
| H | -3.61455835 | 4.94141708  | -0.89854837 | 3.53704103  | -5.04873834 | -0.50407334 | -4.84642400 | 3.78978400  | -0.54707600 |
| H | -4.27652242 | 3.48110266  | -1.72157148 | 4.32438872  | -3.63242234 | -1.30432461 | -5.22093800 | 2.16752200  | -1.23906500 |
| N | -0.22943904 | 0.03602881  | 1.95223421  | 0.16598405  | -0.01694761 | 1.71605035  | -0.20107800 | -0.03126400 | 1.74159500  |
| C | -0.33643783 | 0.04974893  | 3.11472229  | 0.27975017  | -0.01576455 | 2.87488524  | -0.33617600 | -0.05572500 | 2.89734900  |
| C | -0.46557062 | 0.06570018  | 4.55947737  | 0.42963238  | -0.01362040 | 4.31327532  | -0.50559600 | -0.08647500 | 4.33532500  |
| H | 0.24259467  | -0.65542440 | 5.00815399  | 0.38562809  | 1.02248455  | 4.69287159  | 0.37279000  | -0.56557900 | 4.80168700  |
| H | -0.24807620 | 1.07471852  | 4.95448257  | -0.37755241 | -0.60940730 | 4.77484822  | -0.60962400 | 0.94099900  | 4.72402400  |
| H | -1.49225211 | -0.22231808 | 4.85176441  | 1.40556674  | -0.45753268 | 4.58006013  | -1.40927100 | -0.66716700 | 4.58941100  |

**Table S12** Löwdin charges of **1** in atomic units.

| Atom | Type | H separate Charge | H summed into heavy atoms Charge |
|------|------|-------------------|----------------------------------|
| 1    | Fe   | -1.793295         | -1.793295                        |
| 2    | N    | 0.123565          | 0.123565                         |
| 3    | N    | -0.036279         | -0.036279                        |
| 4    | N    | 0.126541          | 0.126541                         |
| 5    | N    | 0.123585          | 0.123585                         |
| 6    | N    | -0.036262         | -0.036262                        |
| 7    | N    | 0.126534          | 0.126534                         |
| 8    | N    | 0.226816          | 0.226816                         |
| 9    | C    | 0.078775          | 0.195637                         |
| 10   | C    | 0.093227          | 0.093227                         |
| 11   | C    | -0.009595         | -0.009595                        |
| 12   | C    | 0.056278          | 0.215411                         |
| 13   | C    | 0.078777          | 0.195611                         |
| 14   | C    | 0.093236          | 0.093236                         |
| 15   | C    | -0.009633         | -0.009633                        |
| 16   | C    | 0.056274          | 0.215403                         |
| 17   | C    | 0.075804          | 0.075804                         |
| 18   | C    | -0.041695         | 0.177017                         |
| 19   | H    | 0.059929          | 0.000000                         |
| 20   | H    | 0.056933          | 0.000000                         |
| 21   | H    | 0.049399          | 0.000000                         |
| 22   | H    | 0.059632          | 0.000000                         |
| 23   | H    | 0.050102          | 0.000000                         |
| 24   | H    | 0.056953          | 0.000000                         |



|    |   |           |           |
|----|---|-----------|-----------|
| 25 | H | 0.059881  | 0.000000  |
| 26 | H | 0.050122  | 0.000000  |
| 27 | H | 0.059635  | 0.000000  |
| 28 | H | 0.049372  | 0.000000  |
| 29 | H | 0.073099  | 0.000000  |
| 30 | H | 0.072627  | 0.000000  |
| 31 | H | 0.072987  | 0.000000  |
| 32 | N | 0.123592  | 0.123592  |
| 33 | N | -0.036267 | -0.036267 |
| 34 | N | 0.126516  | 0.126516  |
| 35 | N | 0.123571  | 0.123571  |
| 36 | N | -0.036284 | -0.036284 |
| 37 | N | 0.126527  | 0.126527  |
| 38 | C | 0.078780  | 0.195666  |
| 39 | C | 0.093218  | 0.093218  |
| 40 | C | -0.009625 | -0.009625 |
| 41 | C | 0.056272  | 0.215403  |
| 42 | C | 0.078773  | 0.195684  |
| 43 | C | 0.093216  | 0.093216  |
| 44 | C | -0.009595 | -0.009595 |
| 45 | C | 0.056276  | 0.215413  |
| 46 | H | 0.056910  | 0.000000  |
| 47 | H | 0.059976  | 0.000000  |
| 48 | H | 0.050104  | 0.000000  |
| 49 | H | 0.059631  | 0.000000  |
| 50 | H | 0.049396  | 0.000000  |
| 51 | H | 0.060013  | 0.000000  |
| 52 | H | 0.056897  | 0.000000  |
| 53 | H | 0.049422  | 0.000000  |
| 54 | H | 0.059628  | 0.000000  |
| 55 | H | 0.050087  | 0.000000  |
| 56 | N | 0.226815  | 0.226815  |
| 57 | C | 0.075811  | 0.075811  |
| 58 | C | -0.041694 | 0.177018  |
| 59 | H | 0.072712  | 0.000000  |
| 60 | H | 0.073185  | 0.000000  |
| 61 | H | 0.072815  | 0.000000  |

**Table S13** Löwdin charges of **2** in atomic units.

| Atom | Type | H separate Charge | H summed into heavy atoms Charge |
|------|------|-------------------|----------------------------------|
| 1    | Fe   | -1.474885         | -1.474885                        |
| 2    | C    | 0.851140          | 0.229429                         |
| 3    | H    | 0.072137          | 0.000000                         |
| 4    | H    | 0.072178          | 0.000000                         |
| 5    | C    | 0.063561          | 0.063561                         |
| 6    | C    | 0.005483          | 0.005483                         |
| 7    | C    | 0.066359          | 0.254888                         |
| 8    | H    | 0.070644          | 0.000000                         |
| 9    | H    | 0.058980          | 0.000000                         |
| 10   | H    | 0.058905          | 0.000000                         |
| 11   | C    | 0.085121          | 0.229434                         |
| 12   | H    | 0.072210          | 0.000000                         |
| 13   | H    | 0.072103          | 0.000000                         |
| 14   | C    | 0.063562          | 0.063562                         |
| 15   | C    | 0.005474          | 0.005474                         |
| 16   | C    | 0.066358          | 0.254890                         |
| 17   | H    | 0.070646          | 0.000000                         |
| 18   | H    | 0.058910          | 0.000000                         |
| 19   | H    | 0.058977          | 0.000000                         |
| 20   | C    | 0.145518          | 0.145518                         |

|    |   |           |          |
|----|---|-----------|----------|
| 21 | C | -0.033094 | 0.233573 |
| 22 | H | 0.088895  | 0.000000 |
| 23 | H | 0.088880  | 0.000000 |
| 24 | H | 0.088893  | 0.000000 |
| 25 | N | 0.135990  | 0.135990 |
| 26 | N | 0.002944  | 0.002944 |
| 27 | N | 0.139136  | 0.139136 |
| 28 | N | 0.135977  | 0.135977 |
| 29 | N | 0.002953  | 0.002953 |
| 30 | N | 0.139131  | 0.139131 |
| 31 | N | 0.195500  | 0.195500 |
| 32 | C | 0.085114  | 0.229429 |
| 33 | H | 0.072137  | 0.000000 |
| 34 | H | 0.072178  | 0.000000 |
| 35 | C | 0.063561  | 0.063561 |
| 36 | C | 0.005483  | 0.005483 |
| 37 | C | 0.066359  | 0.254888 |
| 38 | H | 0.070644  | 0.000000 |
| 39 | H | 0.058980  | 0.000000 |
| 40 | H | 0.058905  | 0.000000 |
| 41 | C | 0.085121  | 0.229434 |
| 42 | H | 0.072210  | 0.000000 |
| 43 | H | 0.072103  | 0.000000 |
| 44 | C | 0.063562  | 0.063562 |
| 45 | C | 0.005474  | 0.005474 |
| 46 | C | 0.066358  | 0.254890 |
| 47 | H | 0.070646  | 0.000000 |
| 48 | H | 0.058910  | 0.000000 |
| 49 | H | 0.058977  | 0.000000 |
| 50 | N | 0.135990  | 0.135990 |
| 51 | N | 0.002944  | 0.002944 |
| 52 | N | 0.139136  | 0.139136 |
| 53 | N | 0.135977  | 0.135977 |
| 54 | N | 0.002953  | 0.002953 |
| 55 | N | 0.139131  | 0.139131 |
| 56 | C | 0.145518  | 0.145518 |
| 57 | C | -0.033094 | 0.233573 |
| 58 | H | 0.088895  | 0.000000 |
| 59 | H | 0.088880  | 0.000000 |
| 60 | H | 0.088893  | 0.000000 |
| 61 | N | 0.195500  | 0.195500 |

**Table S14** Löwdin charges of 1-MeCN in atomic units.

| Atom | Type | H separate Charge | H summed into heavy atoms Charge |
|------|------|-------------------|----------------------------------|
| 1    | Fe   | -1.399131         | -1.399131                        |
| 2    | N    | 0.126714          | 0.126714                         |
| 3    | N    | -0.025866         | -0.025866                        |
| 4    | N    | 0.129393          | 0.129393                         |
| 5    | N    | 0.127429          | 0.127429                         |
| 6    | N    | -0.024001         | -0.024001                        |
| 7    | N    | 0.127010          | 0.127010                         |
| 8    | C    | 0.076503          | 0.202138                         |
| 9    | C    | 0.068201          | 0.068201                         |
| 10   | C    | -0.002088         | -0.002088                        |
| 11   | C    | 0.058050          | 0.222960                         |
| 12   | C    | 0.079748          | 0.204533                         |
| 13   | C    | 0.066206          | 0.066206                         |
| 14   | C    | 0.000091          | 0.000091                         |
| 15   | C    | 0.058084          | 0.222780                         |
| 16   | H    | 0.063449          | 0.000000                         |

|    |   |           |           |
|----|---|-----------|-----------|
| 17 | H | 0.062186  | 0.000000  |
| 18 | H | 0.052547  | 0.000000  |
| 19 | H | 0.061376  | 0.000000  |
| 20 | H | 0.050987  | 0.000000  |
| 21 | H | 0.065843  | 0.000000  |
| 22 | H | 0.058942  | 0.000000  |
| 23 | H | 0.052271  | 0.000000  |
| 24 | H | 0.061450  | 0.000000  |
| 25 | H | 0.050976  | 0.000000  |
| 26 | N | 0.126746  | 0.126746  |
| 27 | N | -0.025803 | -0.025803 |
| 28 | N | 0.129405  | 0.129405  |
| 29 | N | 0.127429  | 0.127429  |
| 30 | N | -0.023985 | -0.023985 |
| 31 | N | 0.127042  | 0.127042  |
| 32 | C | 0.076505  | 0.202157  |
| 33 | C | 0.068186  | 0.068186  |
| 34 | C | -0.002106 | -0.002106 |
| 35 | C | 0.058055  | 0.222957  |
| 36 | C | 0.079737  | 0.204417  |
| 37 | C | 0.066204  | 0.066204  |
| 38 | C | 0.000129  | 0.000129  |
| 39 | C | 0.058090  | 0.222797  |
| 40 | H | 0.062184  | 0.000000  |
| 41 | H | 0.063468  | 0.000000  |
| 42 | H | 0.050987  | 0.000000  |
| 43 | H | 0.061384  | 0.000000  |
| 44 | H | 0.052531  | 0.000000  |
| 45 | H | 0.058951  | 0.000000  |
| 46 | H | 0.065729  | 0.000000  |
| 47 | H | 0.050999  | 0.000000  |
| 48 | H | 0.061451  | 0.000000  |
| 49 | H | 0.052257  | 0.000000  |
| 50 | N | 0.249057  | 0.249057  |
| 51 | C | 0.078458  | 0.078458  |
| 52 | C | -0.039665 | 0.180537  |
| 53 | H | 0.073526  | 0.000000  |
| 54 | H | 0.073198  | 0.000000  |
| 55 | H | 0.073478  | 0.000000  |

**Table S15** Löwdin charges of 2-MeCN in atomic units.

| Atom | Type | H separate Charge | H summed into heavy atoms Charge |
|------|------|-------------------|----------------------------------|
| 1    | Fe   | -1.141500         | -1.141500                        |
| 2    | N    | 0.139310          | 0.139310                         |
| 3    | N    | 0.016516          | 0.016516                         |
| 4    | N    | 0.140212          | 0.140212                         |
| 5    | N    | 0.142180          | 0.142180                         |
| 6    | N    | 0.021967          | 0.021967                         |
| 7    | N    | 0.140676          | 0.140676                         |
| 8    | C    | 0.085344          | 0.238548                         |
| 9    | C    | 0.053971          | 0.053971                         |
| 10   | C    | 0.018358          | 0.018358                         |
| 11   | C    | 0.068283          | 0.263308                         |
| 12   | C    | 0.084637          | 0.238617                         |
| 13   | C    | 0.040022          | 0.040022                         |
| 14   | C    | 0.025164          | 0.025164                         |
| 15   | C    | 0.068546          | 0.264709                         |
| 16   | H    | 0.079205          | 0.000000                         |
| 17   | H    | 0.074000          | 0.000000                         |
| 18   | H    | 0.062512          | 0.000000                         |

|    |   |           |          |
|----|---|-----------|----------|
| 19 | H | 0.072463  | 0.000000 |
| 20 | H | 0.060050  | 0.000000 |
| 21 | H | 0.078204  | 0.000000 |
| 22 | H | 0.075776  | 0.000000 |
| 23 | H | 0.062686  | 0.000000 |
| 24 | H | 0.072902  | 0.000000 |
| 25 | H | 0.060575  | 0.000000 |
| 26 | N | 0.141715  | 0.141715 |
| 27 | N | 0.019314  | 0.019314 |
| 28 | N | 0.140768  | 0.140768 |
| 29 | N | 0.139459  | 0.139459 |
| 30 | N | 0.018617  | 0.018617 |
| 31 | N | 0.140766  | 0.140766 |
| 32 | C | 0.086225  | 0.243101 |
| 33 | C | 0.038534  | 0.038534 |
| 34 | C | 0.022416  | 0.022416 |
| 35 | C | 0.068632  | 0.264498 |
| 36 | C | 0.085168  | 0.239430 |
| 37 | C | 0.054716  | 0.054716 |
| 38 | C | 0.018895  | 0.018895 |
| 39 | C | 0.068274  | 0.263555 |
| 40 | H | 0.075469  | 0.000000 |
| 41 | H | 0.081408  | 0.000000 |
| 42 | H | 0.060593  | 0.000000 |
| 43 | H | 0.072600  | 0.000000 |
| 44 | H | 0.062673  | 0.000000 |
| 45 | H | 0.075160  | 0.000000 |
| 46 | H | 0.079102  | 0.000000 |
| 47 | H | 0.059840  | 0.000000 |
| 48 | H | 0.072625  | 0.000000 |
| 49 | H | 0.062816  | 0.000000 |
| 50 | N | 0.217117  | 0.217117 |
| 51 | C | 0.178110  | 0.178110 |
| 52 | C | -0.027468 | 0.256930 |
| 53 | H | 0.096237  | 0.000000 |
| 54 | H | 0.093415  | 0.000000 |
| 55 | H | 0.094746  | 0.000000 |

**Table S16** Coordinates of the oxoiron(IV) aNHC species  $\text{Fe}^{\text{IV}}[\text{cCCCC}]_{\text{trz}}\text{O}(\text{MeCN})$  calculated by Gaussian (charge 2, multiplicity 3, SCF: E(gas phase) = -1608.58386 h, E(SMD) = -1608.396220 h, E(PCM) = -1608.551107 h).

| Atom | gas phase      |             |             | SMD            |             |             | PCM            |             |             |
|------|----------------|-------------|-------------|----------------|-------------|-------------|----------------|-------------|-------------|
|      | Coordinate [Å] |             |             | Coordinate [Å] |             |             | Coordinate [Å] |             |             |
|      | X              | Y           | Z           | X              | Y           | Z           | X              | Y           | Z           |
| Fe   | -0.00056190    | 0.00011965  | -0.21709907 | -0.00121005    | 0.00546244  | -0.51602674 | -0.00057896    | 0.00025533  | -0.51676418 |
| N    | 1.33851350     | -2.69513318 | -0.36414707 | -2.64605445    | -1.46128151 | -0.35104068 | -2.74415746    | -1.25479573 | -0.40832777 |
| N    | 2.51325896     | -3.32180831 | -0.38294677 | -3.21344453    | -2.65156459 | -0.16951198 | -3.41110768    | -2.38934299 | -0.21522549 |
| N    | 3.39130453     | -2.35858940 | -0.18423514 | -2.19005921    | -3.47437508 | -0.03745171 | -2.46197869    | -3.28391743 | -0.01483481 |
| N    | 2.70946862     | 1.33748220  | -0.05871020 | 1.47150193     | -2.62735690 | -0.14933112 | 1.26269705     | -2.72492804 | -0.08631607 |
| N    | 3.34367228     | 2.50019082  | -0.19913130 | 2.68009554     | -3.18154409 | -0.06639465 | 2.42529838     | -3.37057247 | -0.00856353 |
| N    | 2.37153853     | 3.37009220  | -0.39376979 | 3.50796559     | -2.16420265 | -0.20905432 | 3.32620999     | -2.42959465 | -0.21611139 |
| C    | 0.14595608     | -3.50804934 | -0.66459260 | -3.54192151    | -0.31932527 | -0.59123925 | -3.52523310    | -0.04807553 | -0.72700863 |
| C    | 1.41753036     | -1.33860752 | -0.15609329 | -1.27252706    | -1.47804721 | -0.34791000 | -1.37765026    | -1.37733650 | -0.34615484 |
| C    | 2.79003488     | -1.12961706 | -0.03825719 | -0.98664738    | -2.82526932 | -0.13411726 | -1.20574679    | -2.73307684 | -0.07957671 |
| C    | 4.81958890     | -2.68403806 | -0.15615746 | -2.42197115    | -4.89654187 | 0.19824716  | -2.82285669    | -4.67416194 | 0.25797352  |
| C    | 3.54071747     | 0.14828016  | 0.20310148  | 0.32300536     | -3.53356268 | 0.00312452  | 0.04725159     | -3.52126061 | 0.15274252  |
| C    | 1.34077649     | 1.41686726  | -0.15565433 | 1.48211817     | -1.26920002 | -0.35204171 | 1.37492742     | -1.38166288 | -0.34710040 |
| C    | 1.13088278     | 2.77667390  | -0.37454471 | 2.84570091     | -0.97760731 | -0.38153176 | 2.75434322     | -1.20089307 | -0.42476943 |
| C    | 2.70269643     | 4.77913079  | -0.62062746 | 4.95020119     | -2.39130381 | -0.17718864 | 4.74761977     | -2.77380046 | -0.20208751 |
| H    | 0.22676259     | -4.44242536 | -0.08240519 | -4.40998179    | -0.42929111 | 0.07880689  | -4.46306025    | -0.10071510 | -0.15245075 |
| H    | 0.19455527     | -3.78293375 | -1.73593436 | -3.91191407    | -0.38746308 | -1.63150263 | -3.78921671    | -0.08657525 | -1.80058325 |
| H    | 5.32927216     | -2.17113159 | -0.98837357 | -1.95750751    | -5.47710560 | -0.61476040 | -2.32613442    | -5.32888565 | -0.47483631 |

|   |             |             |             |             |             |             |             |             |             |
|---|-------------|-------------|-------------|-------------|-------------|-------------|-------------|-------------|-------------|
| H | 4.92147014  | -3.77182518 | -0.27166270 | -3.50681300 | -5.06728518 | 0.21854159  | -3.91312795 | -4.76483708 | 0.16713843  |
| H | 5.25257386  | -2.36451819 | 0.80541620  | -1.97042485 | -5.18029311 | 1.16237880  | -2.50305462 | -4.94239042 | 1.27736419  |
| H | 3.89734817  | 0.20749047  | 1.24981594  | 0.40024416  | -4.01331960 | 0.99546427  | 0.08774680  | -3.88854648 | 1.19454844  |
| H | 4.42982020  | 0.22295984  | -0.44606722 | 0.41701091  | -4.33111362 | -0.75530275 | 0.09094812  | -4.40382348 | -0.50833880 |
| H | 2.35101095  | 5.08251228  | -1.62023285 | 5.38986057  | -2.05349479 | -1.12898894 | 5.19423557  | -2.52048666 | -1.17576335 |
| H | 3.79451812  | 4.88502479  | -0.56003773 | 5.12251441  | -3.46692072 | -0.03610397 | 4.83189930  | -3.85217317 | -0.01475898 |
| H | 2.22114408  | 5.39978243  | 0.15242136  | 5.38699593  | -1.82092356 | 0.65811462  | 5.25002677  | -2.21008954 | 0.59982623  |
| N | -1.33966535 | 2.69541527  | -0.36193896 | 2.64372875  | 1.47107131  | -0.34616154 | 2.74307419  | 1.25526532  | -0.40992452 |
| N | -2.51438280 | 3.32215004  | -0.37969314 | 3.21156571  | 2.66028696  | -0.15910628 | 3.41019298  | 2.38966820  | -0.21654933 |
| N | -3.39235540 | 2.35887416  | -0.18105497 | 2.18853447  | 3.48215549  | -0.01874431 | 2.46122448  | 3.28422472  | -0.01535625 |
| N | -2.71051227 | -1.33733261 | -0.05784603 | -1.47314930 | 2.63579948  | -0.12831416 | -1.26353355 | 2.72533283  | -0.08472623 |
| N | -3.34473201 | -2.50004994 | -0.19812916 | -2.68161438 | 3.19001874  | -0.04395696 | -2.42608797 | 3.37097925  | -0.00618212 |
| N | -2.37268755 | -3.36983662 | -0.39361344 | -3.50965581 | 2.17356566  | -0.19182212 | -3.32712154 | 2.43003483  | -0.21334690 |
| C | -0.14733395 | 3.50848537  | -0.66282865 | 3.53901348  | 0.33091094  | -0.59728649 | 3.52396889  | 0.04864351  | -0.72943750 |
| C | -1.41861993 | 1.33876724  | -0.15458039 | 1.27018837  | 1.48764130  | -0.33847955 | 1.37660174  | 1.37787888  | -0.34709772 |
| C | -2.79106244 | 1.12977902  | -0.03615820 | 0.98488354  | 2.83350479  | -0.11555978 | 1.20491724  | 2.73350719  | -0.07981938 |
| C | -4.82059022 | 2.68440518  | -0.15182732 | 2.42102440  | 4.90292210  | 0.22471394  | 2.82235182  | 4.67429940  | 0.25798778  |
| C | -3.54179469 | -0.14824657 | 0.20433561  | -0.32446309 | 3.54095319  | 0.02876176  | -0.04792747 | 3.52173069  | 0.15328161  |
| C | -1.34187560 | -1.41661733 | -0.15565575 | -1.48398378 | 1.27853731  | -0.33699136 | -1.37592236 | 1.38209891  | -0.34556274 |
| C | -1.13206282 | -2.77634864 | -0.37510335 | -2.84764531 | 0.98754329  | -0.36877073 | -2.75538585 | 1.20135864  | -0.42247641 |
| C | -2.70389957 | -4.77889558 | -0.62025925 | -4.95185091 | 2.40075597  | -0.16124752 | -4.74852446 | 2.77423291  | -0.19846750 |
| H | -0.19666172 | 3.78385640  | -1.73401183 | 3.90524491  | 0.40636926  | -1.63837737 | 3.78730574  | 0.08745902  | -1.80315853 |
| H | -0.22777000 | 4.44259116  | -0.08015592 | 4.40936649  | 0.43651838  | 0.07044173  | 4.46213963  | 0.10114700  | -0.15542911 |
| H | -5.25288476 | 2.36461366  | 0.80996669  | 1.97154579  | 5.18107583  | 1.19143427  | 2.50275721  | 4.94212776  | 1.27754688  |
| H | -4.92247892 | 3.77223909  | -0.26687955 | 3.50590642  | 5.07356344  | 0.24358402  | 3.91262538  | 4.76483909  | 0.16704431  |
| H | -5.33092298 | 2.17181053  | -0.98383711 | 1.95481500  | 5.48818567  | -0.58393279 | 2.32563596  | 5.32942927  | -0.47446203 |
| H | -4.43067317 | -0.22253761 | -0.44520197 | -0.41967930 | 4.34362837  | -0.72406191 | -0.09213285 | 4.40413252  | -0.5798901  |
| H | -3.89891228 | -0.20804908 | 1.25084413  | -0.40008808 | 4.01389315  | 1.02450403  | -0.08767503 | 3.88931166  | 1.19501043  |
| H | -2.22231590 | -5.39944381 | 0.15285560  | -5.39000081 | 1.82774157  | 0.67153616  | -5.25045238 | 2.21051175  | 0.60373984  |
| H | -3.79571806 | -4.88474546 | -0.55954860 | -5.12427357 | 3.47593755  | -0.01699702 | -4.83270244 | 3.85260481  | -0.01108927 |
| H | -2.35231532 | -5.08241368 | -1.61985574 | -5.39009929 | 2.06604598  | -1.11480084 | -5.19570711 | 2.52091406  | -1.17188226 |
| N | 0.00130826  | -0.00058179 | 1.88532071  | 0.00331852  | -0.01119686 | 1.58783149  | 0.00121850  | -0.00059665 | 1.58240889  |
| C | 0.00487740  | -0.00130851 | 3.04978185  | 0.00907171  | -0.04120466 | 2.75087133  | 0.00421176  | -0.00207706 | 2.74534592  |
| C | 0.01043370  | -0.00218061 | 4.50539411  | 0.01742741  | -0.08590602 | 4.20010089  | 0.00860564  | -0.00378218 | 4.19756628  |
| H | 0.51168047  | 0.90550688  | 4.88528450  | 0.92081286  | -0.61496269 | 4.55127732  | 0.89609428  | -0.54409975 | 4.56884439  |
| H | -1.02417235 | -0.02284386 | 4.89084543  | 0.01737986  | 0.94075235  | 4.60626819  | 0.03434922  | 1.03336643  | 4.57321027  |
| H | 0.54673764  | -0.89016148 | 4.88397517  | -0.87923973 | -0.61921418 | 4.56185203  | -0.90109776 | -0.50151983 | 4.57455691  |
| O | -0.00101196 | 0.00056783  | -1.87437707 | -0.00363625 | 0.01340199  | -2.17650064 | -0.00139537 | 0.00045275  | -2.17660809 |

**Table S17** Coordinates of the oxoiron(V) aNHC species  $\text{Fe}^{\text{V}}[\text{cCCCC}]_{\text{tr}}\text{O}(\text{MeCN})$  calculated by Gaussian (charge 3, multiplicity 2, SCF: E(gas phase) = -1607.912749 h, E(SMD) = -1608.396220 h, E(PCM) = -1608.349534 h).

| Atom | gas phase<br>Coordinate [Å] |             |             | SMD<br>Coordinate [Å] |             |             | PCM<br>Coordinate [Å] |             |             |
|------|-----------------------------|-------------|-------------|-----------------------|-------------|-------------|-----------------------|-------------|-------------|
|      | X                           | Y           | Z           | X                     | Y           | Z           | X                     | Y           | Z           |
| Fe   | -0.00050655                 | -0.00042714 | -0.53584822 | -0.00067736           | -0.00725898 | -0.68017305 | 0.00216487            | 0.00056457  | -0.69759563 |
| N    | 3.02748152                  | 0.00288857  | -0.40311787 | 2.90196038            | 0.83258741  | -0.46918957 | 2.86810272            | 0.92475135  | -0.51448440 |
| N    | 4.10423969                  | 0.75657601  | -0.22979886 | 3.72091746            | 1.83144949  | -0.17225500 | 3.66603601            | 1.92826619  | -0.18182439 |
| N    | 3.62986508                  | 1.96696160  | -0.02833004 | 2.91671403            | 2.84637930  | 0.07399654  | 2.84045054            | 2.90743295  | 0.12937883  |
| N    | 0.00054427                  | 2.98338704  | -0.03406333 | -0.82810198           | 2.82944637  | -0.02136649 | -0.91199167           | 2.78836117  | 0.02493388  |
| N    | -0.77939773                 | 4.05390583  | -0.05231293 | -1.88246614           | 3.62746742  | 0.04774890  | -1.98881509           | 3.55677508  | 0.08891181  |
| N    | -1.99317358                 | 3.58909263  | -0.25902824 | -2.91420333           | 2.84738514  | -0.20505297 | -2.99060706           | 2.75988033  | -0.22422250 |
| C    | 3.23171536                  | -1.42207911 | -0.70329679 | 3.48350847            | -0.47175987 | -0.79949844 | 3.46516052            | -0.35603489 | -0.91332984 |
| C    | 1.84231140                  | 0.69120557  | -0.32523985 | 1.57446156            | 1.16694440  | -0.43300708 | 1.53320209            | 1.22000956  | -0.43817136 |
| C    | 2.25348024                  | 1.99284263  | -0.06901684 | 1.59734862            | 2.50490659  | -0.06245571 | 1.52521158            | 2.53725189  | -0.00263884 |
| C    | 4.56137017                  | 3.08599985  | 0.18605562  | 3.46697805            | 4.14510248  | 0.45639602  | 3.37671057            | 4.19778570  | 0.56676443  |
| C    | 1.44163065                  | 3.22603160  | 0.17346447  | 0.48100747            | 3.44239812  | 0.24379842  | 0.37442420            | 3.40868568  | 0.38100500  |
| C    | -0.68673867                 | 1.80765327  | -0.22466124 | -1.15249082           | 1.53221416  | -0.32254620 | -1.19267337           | 1.49526417  | -0.33054288 |
| C    | -2.00874069                 | 2.21981766  | -0.37153530 | -2.53967227           | 1.55345925  | -0.43708396 | -2.57411262           | 1.48359520  | -0.48967661 |
| C    | -3.12087987                 | 4.53095036  | -0.36276498 | -4.26533698           | 3.40858901  | -0.22090023 | -4.35657012           | 3.28985976  | -0.24846213 |
| H    | 4.11288160                  | -1.75920129 | -0.13201606 | 4.43768696            | -0.56202022 | -0.25878271 | 4.46205825            | -0.41697099 | -0.45328593 |

|   |             |             |             |             |             |             |             |             |             |
|---|-------------|-------------|-------------|-------------|-------------|-------------|-------------|-------------|-------------|
| H | 3.47628589  | -1.51972900 | -1.77934803 | 3.69615947  | -0.50344652 | -1.88428605 | 3.59178331  | -0.36180785 | -2.01148763 |
| H | 4.45548789  | 3.80896724  | -0.63952086 | 3.16510906  | 4.89503795  | -0.29146319 | 3.08258324  | 4.97721256  | -0.15275797 |
| H | 5.58160673  | 2.67727247  | 0.19683730  | 4.56072301  | 4.05273956  | 0.49101348  | 4.47001102  | 4.10880368  | 0.60450846  |
| H | 4.33654049  | 3.56871725  | 1.15072840  | 3.07078031  | 4.42179388  | 1.44631694  | 2.97958292  | 4.43383983  | 1.56564897  |
| H | 1.57569698  | 3.59561078  | 1.20786415  | 0.50851914  | 3.73529072  | 1.30909636  | 0.36963500  | 3.58283320  | 1.47274381  |
| H | 1.73304692  | 4.04703647  | -0.50571252 | 0.54911833  | 4.36150535  | -0.36191852 | 0.41523470  | 4.39034172  | -0.11839417 |
| H | -3.58478940 | 4.43178009  | -1.35752780 | -4.70573974 | 3.24700747  | -1.21710952 | -4.78080353 | 3.15223199  | -1.25411928 |
| H | -2.72057575 | 5.54650820  | -0.23352852 | -4.18527164 | 4.48184914  | -0.00180924 | -4.30143474 | 4.35746434  | 0.00039794  |
| H | -3.85436356 | 4.30940255  | 0.42939219  | -4.86991668 | 2.90071267  | 0.54709196  | -4.96154914 | 2.75503470  | 0.49977305  |
| N | -3.02835068 | -0.00362668 | -0.40096423 | -2.90313676 | -0.84476282 | -0.45902102 | -2.86431180 | -0.92380453 | -0.52177728 |
| N | -4.10500830 | -0.75716047 | -0.22650304 | -3.72211540 | -1.84168324 | -0.15577641 | -3.66299027 | -1.92715875 | -0.19040279 |
| N | -3.63058936 | -1.96753174 | -0.02520207 | -2.91785047 | -2.85457743 | 0.09856247  | -2.83811586 | -2.90661557 | 0.12174305  |
| N | -0.00127372 | -2.98413958 | -0.03303554 | 0.82678289  | -2.83851814 | 0.00159376  | 0.91455585  | -2.78772402 | 0.02534872  |
| N | 0.77882429  | -4.05457323 | -0.05070329 | 1.88094839  | -3.63651785 | 0.07314195  | 1.99117228  | -3.55632361 | 0.09067307  |
| N | 1.99245146  | -3.58974795 | -0.25812482 | 2.91249182  | -2.85832179 | -0.18621822 | 2.99366241  | -2.75921300 | -0.21967324 |
| C | -3.23280117 | 1.42111386  | -0.70199144 | -3.48470850 | 0.45623404  | -0.80258894 | -3.46057378 | 0.35726921  | -0.92087626 |
| C | -1.84315134 | -0.69198867 | -0.32372883 | -1.57553715 | -1.17842042 | -0.41887720 | -1.52958736 | -1.21942365 | -0.44365490 |
| C | -2.25422873 | -1.99352715 | -0.06693035 | -1.59844612 | -2.51362342 | -0.03877923 | -1.52259197 | -2.53677433 | -0.00838828 |
| C | -4.56203242 | -3.08636848 | 0.19043916  | -3.46800415 | -4.15126511 | 0.48783727  | -3.37537666 | -4.19671866 | 0.55864337  |
| C | -1.44239503 | -3.22702578 | 0.17400098  | -0.48218375 | -3.44987327 | 0.27143612  | -0.37273269 | -3.40850565 | 0.37745596  |
| C | 0.68578944  | -1.80847355 | -0.22463939 | 1.15107079  | -1.54307669 | -0.30747369 | 1.19607053  | -1.49428770 | -0.32822169 |
| C | 2.00779463  | -2.22055485 | -0.37171360 | 2.53802949  | -1.56554782 | -0.42468089 | 2.57781834  | -1.48262725 | -0.48465892 |
| C | 3.12029856  | -4.53151186 | -0.36108795 | 4.26324410  | -3.42036023 | -0.20245645 | 4.35961744  | -3.28930787 | -0.24195498 |
| H | -3.47784730 | 1.51803163  | -1.77800284 | -3.69581017 | 0.47713280  | -1.88791827 | -3.58518617 | 0.36381980  | -2.01925326 |
| H | -4.11373049 | 1.75856731  | -0.13054155 | -4.43961338 | 0.55158748  | -0.26409312 | -4.45831263 | 0.41785419  | -0.46261869 |
| H | -4.33702267 | -3.56812307 | 1.15555146  | -3.07053900 | -4.42347102 | 1.47847152  | -2.98087549 | -4.43202873 | 1.55876021  |
| H | -5.58226244 | -2.67762189 | 0.20107652  | -4.56166840 | -4.05845221 | 0.52344491  | -4.46878004 | -4.10782203 | 0.59346183  |
| H | -4.45632937 | -3.81013415 | -0.63445596 | -3.16734289 | -4.90476131 | -0.25697234 | -3.07928932 | -4.97664195 | -0.15952160 |
| H | -1.73379109 | -4.04696818 | -0.50649827 | -0.55121894 | -4.37181544 | -0.32986706 | -0.41210842 | -4.38969389 | -0.12298995 |
| H | -1.57661246 | -3.59833358 | 1.20773206  | -0.50857820 | -3.73769937 | 1.33811728  | -0.37088885 | -3.58376649 | 1.46904066  |
| H | 3.85337123  | -4.30967365 | 0.43137344  | 4.86953723  | -2.91033368 | 0.56276069  | 4.96313886  | -2.75578699 | 0.50838383  |
| H | 2.72004020  | -5.54706987 | -0.23171798 | 4.18291202  | -4.49284797 | 0.02027446  | 4.30386516  | -4.35732241 | 0.00499624  |
| H | 3.58464274  | -4.43258893 | -1.35566827 | 4.70192477  | -3.26235082 | -1.19999481 | 4.78588823  | -3.15003683 | -1.24652599 |
| N | 0.00103308  | 0.00064924  | 1.66393362  | 0.00164390  | 0.01082946  | 1.45734092  | -0.00293032 | -0.00024011 | 1.44527618  |
| C | 0.00350656  | 0.00308633  | 2.82949395  | 0.00589460  | 0.04827777  | 2.61903606  | -0.01352848 | -0.00286421 | 2.60745343  |
| C | 0.00756616  | 0.00702741  | 4.28297929  | 0.01227476  | 0.10361355  | 4.06470836  | -0.02952688 | -0.00856049 | 4.05628748  |
| H | -0.58872650 | 0.85607208  | 4.66313675  | -0.88841729 | 0.63587034  | 4.41787382  | -0.86877083 | 0.60828973  | 4.42028040  |
| H | -0.42784028 | -0.93280482 | 4.66768052  | 0.01697492  | -0.92132683 | 4.47506877  | -0.15198961 | -1.04286729 | 4.42045818  |
| H | 1.04207249  | 0.09886097  | 4.66025829  | 0.91406089  | 0.64000576  | 4.40879123  | 0.91966700  | 0.40317964  | 4.43948106  |
| O | -0.00101316 | -0.00067955 | -2.09665571 | -0.00143761 | -0.01603658 | -2.25016587 | 0.00438527  | 0.00134376  | -2.26485728 |

**Table S18** Coordinates of the oxoiron(IV) aNHC species  $\text{Fe}^{\text{IV}}[\text{cCCCC}]_{\text{tr}}\text{O}(\text{MeCN})$  calculated by Gaussian (charge 2, multiplicity 3, SCF: E = -1475.744736 h).

| Atom | Coordinate [Å] |             |             |
|------|----------------|-------------|-------------|
|      | X              | Y           | Z           |
| Fe   | 0.00000265     | -0.00000407 | 0.32833349  |
| N    | -2.63085020    | 1.46669079  | 0.06752492  |
| N    | -3.20176707    | 2.64474866  | -0.13788308 |
| N    | -2.18674418    | 3.46944258  | -0.30400506 |
| N    | 1.47685711     | 2.62105094  | -0.18328453 |
| N    | 2.68303273     | 3.16869497  | -0.27057259 |
| N    | 3.51075317     | 2.15767640  | -0.09749111 |
| C    | -3.51289684    | 0.33326443  | 0.38383867  |
| C    | -1.25097301    | 1.47999671  | 0.04778750  |
| C    | -0.97657995    | 2.82416057  | -0.20445074 |
| C    | -2.44352759    | 4.89009225  | -0.55951574 |
| C    | 0.33412700     | 3.53684736  | -0.32173525 |
| C    | 1.47763558     | 1.26110146  | 0.04831721  |
| C    | 2.84287648     | 0.97391202  | 0.09395855  |
| C    | 4.95736620     | 2.40059140  | -0.11984996 |

|   |             |             |             |
|---|-------------|-------------|-------------|
| H | -4.44171110 | 0.46518012  | -0.19485105 |
| H | -3.77443762 | 0.39951685  | 1.45806351  |
| H | -1.98413288 | 5.49417379  | 0.23975147  |
| H | -3.53166523 | 5.04173458  | -0.56439566 |
| H | -2.01953315 | 5.17077633  | -1.53738423 |
| H | 0.42875465  | 4.04921693  | -1.29696784 |
| H | 0.43123315  | 4.31091952  | 0.46210906  |
| H | 5.39364932  | 2.10179082  | 0.84687664  |
| H | 5.11605223  | 3.47474575  | -0.28713301 |
| H | 5.41441122  | 1.82163159  | -0.93879061 |
| N | 2.63085102  | -1.46668792 | 0.06751375  |
| N | 3.20176750  | -2.64474592 | -0.13789594 |
| N | 2.18674514  | -3.46944140 | -0.30401209 |
| N | -1.47685679 | -2.62104663 | -0.18327423 |
| N | -2.68303354 | -3.16868804 | -0.27058099 |
| N | -3.51075302 | -2.15766922 | -0.09750112 |
| C | 3.51290039  | -0.33326134 | 0.38381579  |
| C | 1.25097203  | -1.47999963 | 0.04779705  |
| C | 0.97658066  | -2.82416456 | -0.20443627 |
| C | 2.44352797  | -4.89009104 | -0.55952446 |
| C | -0.33412875 | -3.53684958 | -0.32170517 |
| C | -1.47763645 | -1.26109951 | 0.04833866  |
| C | -2.84287669 | -0.97390724 | 0.09396660  |
| C | -4.95736646 | -2.40058006 | -0.11988471 |
| H | 3.77446258  | -0.39951697 | 1.45803526  |
| H | 4.44170453  | -0.46517409 | -0.19489136 |
| H | 2.01950313  | -5.17078225 | -1.53737767 |
| H | 3.53166627  | -5.04172752 | -0.56443956 |
| H | 1.98416244  | -5.49417067 | 0.23976100  |
| H | -0.43123785 | -4.31090488 | 0.46215566  |
| H | -0.42875889 | -4.04923919 | -1.29692676 |
| H | -5.41439381 | -1.82163132 | -0.93884314 |
| H | -5.11605220 | -3.47473654 | -0.28715447 |
| H | -5.39366716 | -2.10176387 | 0.84682897  |
| O | -0.00001190 | -0.00002363 | 1.95360387  |

**Table S19** Coordinates of the oxoiron(V) aNHC species  $\text{Fe}^{\text{V}}[\text{cCCCC}]_{\text{trz}}\text{O}(\text{MeCN})$  calculated by Gaussian (charge 3, multiplicity 2, SCF: E(gas phase) = -1475.298415 h).

| Atom | Coordinate [Å] |             |             |
|------|----------------|-------------|-------------|
|      | X              | Y           | Z           |
| Fe   | -0.00000300    | -0.00000900 | 0.51003100  |
| N    | -2.93016500    | 0.67975800  | 0.19369200  |
| N    | -3.80648200    | 1.61231400  | -0.12821900 |
| N    | -3.07674800    | 2.66770400  | -0.42121800 |
| N    | 0.66282000     | 2.85512800  | -0.30553900 |
| N    | 1.66728100     | 3.70840900  | -0.34052700 |
| N    | 2.73866800     | 2.99996900  | -0.04900100 |
| C    | -3.42479400    | -0.64340400 | 0.58272500  |
| C    | -1.61468700    | 1.08620100  | 0.12866800  |
| C    | -1.73294400    | 2.40959700  | -0.28816900 |
| C    | -3.73557700    | 3.92128000  | -0.82835000 |
| C    | -0.67000200    | 3.40670100  | -0.59753000 |
| C    | 1.05015600     | 1.56184800  | -0.00229100 |
| C    | 2.43413100     | 1.68272300  | 0.16587500  |
| C    | 4.05294000     | 3.66747300  | 0.01447100  |
| H    | -4.41037900    | -0.78708300 | 0.11095000  |
| H    | -3.56896500    | -0.66284600 | 1.68148500  |
| H    | -3.49329000    | 4.71073400  | -0.09807100 |
| H    | -4.81989000    | 3.74109700  | -0.84067100 |
| H    | -3.38739100    | 4.20409200  | -1.83508200 |

|   |             |             |             |
|---|-------------|-------------|-------------|
| H | -0.69266500 | 3.70148400  | -1.66441500 |
| H | -0.78286100 | 4.32907600  | 0.00054700  |
| H | 4.47884400  | 3.53086400  | 1.02149000  |
| H | 3.89166100  | 4.73629100  | -0.18623900 |
| H | 4.71602000  | 3.23492900  | -0.75252900 |
| N | 2.93018100  | -0.67975800 | 0.19370100  |
| N | 3.80648700  | -1.61231900 | -0.12823800 |
| N | 3.07673600  | -2.66770300 | -0.42121800 |
| N | -0.66282400 | -2.85512700 | -0.30554600 |
| N | -1.66727900 | -3.70841200 | -0.34051400 |
| N | -2.73867100 | -2.99996600 | -0.04900400 |
| C | 3.42480600  | 0.64341200  | 0.58271800  |
| C | 1.61470800  | -1.08617900 | 0.12868100  |
| C | 1.73293200  | -2.40957600 | -0.28817000 |
| C | 3.73555500  | -3.92128400 | -0.82835200 |
| C | 0.66999900  | -3.40668200 | -0.59754500 |
| C | -1.05015800 | -1.56184500 | -0.00229400 |
| C | -2.43413400 | -1.68272600 | 0.16588100  |
| C | -4.05294200 | -3.66747100 | 0.01446600  |
| H | 3.56899100  | 0.66286600  | 1.68147500  |
| H | 4.41038200  | 0.78709800  | 0.11092700  |
| H | 3.38738000  | -4.20408100 | -1.83509200 |
| H | 4.81986900  | -3.74111400 | -0.84065600 |
| H | 3.49324800  | -4.71074400 | -0.09808600 |
| H | 0.78287100  | -4.32906500 | 0.00051800  |
| H | 0.69267000  | -3.70144800 | -1.66443500 |
| H | -4.71602300 | -3.23492700 | -0.75253400 |
| H | -3.89166300 | -4.73628800 | -0.18624200 |
| H | -4.47884700 | -3.53085900 | 1.02148500  |
| O | 0.00001800  | -0.00002900 | 2.05888500  |



**Table S20** Calculation of different  $\Delta H^\circ$  [Hartree] and [kJ mol<sup>-1</sup>].

| Compound                                        | $\Delta H^\circ$ [Hartree] |              |              | $\Delta H^\circ$ [kJ mol <sup>-1</sup> ] |             |             |
|-------------------------------------------------|----------------------------|--------------|--------------|------------------------------------------|-------------|-------------|
|                                                 | gas phase                  | SMD          | PCM          | gas phase                                | SMD         | PCM         |
| <b>1</b>                                        | -1665.355501               | -1665.573219 | -1665.541399 | -4372390.87                              | -4372962.49 | -4372878.94 |
| <b>2</b>                                        | -1664.94828                | -1665.408009 | -1665.363861 | -4371321.70                              | -4372528.73 | -4372412.82 |
| <b>1-MeCN</b>                                   | -1532.785339               | -1533.013274 | -1532.979076 | -4024327.91                              | -4024926.35 | -4024836.56 |
| <b>2-MeCN</b>                                   | -1532.361236               | -1532.842549 | -1532.792943 | -4023214.43                              | -4024478.11 | -4024347.87 |
| Fe <sup>IV</sup> [cCCCC] <sub>trz</sub> O(MeCN) | -1607.885221               | -1608.120014 | -1608.087002 | -4221502.65                              | -4222119.10 | -4222032.42 |
| Fe <sup>V</sup> [cCCCC] <sub>trz</sub> O(MeCN)  | -1475.332510               | -            | -            | -3873485.51                              | -           | -           |
| Fe <sup>IV</sup> [cCCCC] <sub>trz</sub> O       | -1607.449151               | -1607.930996 | -1607.883184 | -4220357.75                              | -4221622.83 | -4221497.30 |
| Fe <sup>V</sup> [cCCCC] <sub>trz</sub> O        | -1474.886003               | -            | -            | -3872313.20                              | -           | -           |
| MeCN                                            | -132.520553                | -132.529534  | -132.527891  | -347932.71                               | -347956.29  | -347951.98  |
| <i>cis</i> -cyclooctene                         | -312.667748                | -312.675301  | -312.668998  | -820909.17                               | -820929.00  | -820912.45  |
| cyclooctene oxide                               | -387.770767                | -387.780812  | -387.774625  | -1018092.15                              | -1018118.52 | -1018102.28 |
| H <sub>2</sub> O <sub>2</sub>                   | -151.342281                | -151.352587  | -151.348983  | -397349.16                               | -397376.22  | -397366.75  |
| H <sub>2</sub> O                                | -76.316585                 | -76.323810   | -76.322826   | -200369.19                               | -200388.16  | -200385.58  |

**Table S21** Calculation of different  $\Delta H^\circ$  [kcal mol<sup>-1</sup>] and [eV].

| Compound                                        | $\Delta H^\circ$ [kcal mol <sup>-1</sup> ] |             |             | $\Delta H^\circ$ [eV] |           |           |
|-------------------------------------------------|--------------------------------------------|-------------|-------------|-----------------------|-----------|-----------|
|                                                 | gas phase                                  | SMD         | PCM         | gas phase             | SMD       | PCM       |
| <b>1</b>                                        | -1045015.57                                | -1045152.19 | -1045132.22 | -45315.49             | -45321.41 | -45320.55 |
| <b>2</b>                                        | -1044760.04                                | -1045048.52 | -1045020.82 | -45304.41             | -45316.92 | -45315.72 |
| <b>1-MeCN</b>                                   | -961827.40                                 | -961970.43  | -961948.97  | -41708.16             | -41714.36 | -41713.43 |
| <b>2-MeCN</b>                                   | -961561.27                                 | -961863.30  | -961832.17  | -41696.62             | -41709.72 | -41708.37 |
| Fe <sup>IV</sup> [cCCCC] <sub>trz</sub> O(MeCN) | -1008952.80                                | -1009100.13 | -1009079.42 | -43751.68             | -43758.07 | -43757.17 |
| Fe <sup>V</sup> [cCCCC] <sub>trz</sub> O(MeCN)  | -925775.58                                 | -           | -           | -40144.83             | -         | -         |
| Fe <sup>IV</sup> [cCCCC] <sub>trz</sub> O       | -1008679.16                                | -1008981.52 | -1008951.52 | -43739.82             | -43752.93 | -43751.63 |
| Fe <sup>V</sup> [cCCCC] <sub>trz</sub> O        | -925495.39                                 | -           | -           | -40132.68             | -         | -         |
| MeCN                                            | -83157.04                                  | -83162.68   | -83161.65   | -3605.98              | -3606.22  | -3606.18  |
| <i>cis</i> -cyclooctene                         | -196199.95                                 | -196204.69  | -196200.73  | -8507.91              | -8508.11  | -8507.94  |
| cyclooctene oxide                               | -243327.32                                 | -243333.62  | -243329.74  | -10551.51             | -10551.79 | -10551.62 |
| H <sub>2</sub> O <sub>2</sub>                   | -94967.74                                  | -94974.20   | -94971.94   | -4118.13              | -4118.41  | -4118.31  |
| H <sub>2</sub> O                                | -47888.89                                  | -47893.42   | -47892.80   | -2076.63              | -2076.82  | -2076.80  |

**Table S22** Calculation of different  $\Delta G^\circ$  [Hartree] and [kJ mol<sup>-1</sup>].

| Compound                                        | $\Delta G^\circ$ [Hartree] |              |              | $\Delta G^\circ$ [kJ mol <sup>-1</sup> ] |              |              |
|-------------------------------------------------|----------------------------|--------------|--------------|------------------------------------------|--------------|--------------|
|                                                 | gas phase                  | SMD          | gas phase    | SMD                                      | gas phase    | SMD          |
| <b>1</b>                                        | -1665.453792               | -1665.681118 | -1665.453792 | -1665.681118                             | -1665.453792 | -1665.681118 |
| <b>2</b>                                        | -1665.057415               | -1665.512037 | -1665.057415 | -1665.512037                             | -1665.057415 | -1665.512037 |
| <b>1-MeCN</b>                                   | -1532.875633               | -1533.107743 | -1532.875633 | -1533.107743                             | -1532.875633 | -1533.107743 |
| <b>2-MeCN</b>                                   | -1532.456032               | -1532.935623 | -1532.456032 | -1532.935623                             | -1532.456032 | -1532.935623 |
| Fe <sup>IV</sup> [cCCCC] <sub>trz</sub> O(MeCN) | -1607.979198               | -1608.216089 | -1607.979198 | -1608.216089                             | -1607.979198 | -1608.216089 |
| Fe <sup>V</sup> [cCCCC] <sub>trz</sub> O(MeCN)  | -1475.417876               | -            | -1475.417876 | -                                        | -1475.417876 | -            |
| Fe <sup>IV</sup> [cCCCC] <sub>trz</sub> O       | -1607.546972               | -1608.025116 | -1607.546972 | -1608.025116                             | -1607.546972 | -1608.025116 |
| Fe <sup>V</sup> [cCCCC] <sub>trz</sub> O        | -1474.969790               | -            | -1474.969790 | -                                        | -1474.969790 | -            |
| MeCN                                            | -132.548182                | -132.557116  | -132.548182  | -132.557116                              | -132.548182  | -132.557116  |
| <i>cis</i> -cyclooctene                         | -312.667748                | -312.675301  | -312.667748  | -312.675301                              | -312.667748  | -312.675301  |
| cyclooctene oxide                               | -387.770767                | -387.780812  | -387.770767  | -387.780812                              | -387.770767  | -387.780812  |
| H <sub>2</sub> O <sub>2</sub>                   | -151.342281                | -151.352587  | -151.342281  | -151.352587                              | -151.342281  | -151.352587  |
| H <sub>2</sub> O                                | -76.316585                 | -76.323810   | -76.316585   | -76.323810                               | -76.316585   | -76.323810   |

**Table S23** Calculation of different  $\Delta G^\circ$  [kcal mol<sup>-1</sup>] and [eV].

| Compound                                        | $\Delta G^\circ$ [kcal mol <sup>-1</sup> ] |             | $\Delta G^\circ$ [eV] |             |             |             |
|-------------------------------------------------|--------------------------------------------|-------------|-----------------------|-------------|-------------|-------------|
|                                                 | gas phase                                  | SMD         | gas phase             | SMD         | gas phase   | SMD         |
| <b>1</b>                                        | -1045077.25                                | -1045219.90 | -1045077.25           | -1045219.90 | -1045077.25 | -1045219.90 |
| <b>2</b>                                        | -1044828.52                                | -1045113.80 | -1044828.52           | -1045113.80 | -1044828.52 | -1045113.80 |
| <b>1</b> -MeCN                                  | -961884.06                                 | -962029.71  | -961884.06            | -962029.71  | -961884.06  | -962029.71  |
| <b>2</b> -MeCN                                  | -961620.76                                 | -961921.70  | -961620.76            | -961921.70  | -961620.76  | -961921.70  |
| Fe <sup>IV</sup> [cCCCC] <sub>trz</sub> O(MeCN) | -1009011.77                                | -1009160.42 | -1009011.77           | -1009160.42 | -1009011.77 | -1009160.42 |
| Fe <sup>V</sup> [cCCCC] <sub>trz</sub> O(MeCN)  | -925829.14                                 | -           | -925829.14            | -           | -925829.14  | -           |
| Fe <sup>IV</sup> [cCCCC] <sub>trz</sub> O       | -1008740.55                                | -1009040.58 | -1008740.55           | -1009040.58 | -1008740.55 | -1009040.58 |
| Fe <sup>V</sup> [cCCCC] <sub>trz</sub> O        | -925547.97                                 | -           | -925547.97            | -           | -925547.97  | -           |
| MeCN                                            | -83174.38                                  | -83179.99   | -83174.38             | -83179.99   | -83174.38   | -83179.99   |
| <i>cis</i> -cyclooctene                         | -196199.95                                 | -196204.69  | -196199.95            | -196204.69  | -196199.95  | -196204.69  |
| cyclooctene oxide                               | -243327.32                                 | -243333.62  | -243327.32            | -243333.62  | -243327.32  | -243333.62  |
| H <sub>2</sub> O <sub>2</sub>                   | -94967.74                                  | -94974.20   | -94967.74             | -94974.20   | -94967.74   | -94974.20   |
| H <sub>2</sub> O                                | -47888.89                                  | -47893.42   | -47888.89             | -47893.42   | -47888.89   | -47893.42   |

**Table S24** BDEs and  $\Delta G$  of dative bonds toward one labile acetonitrile ligand.

| Compound                                        | BDE [kJ mol <sup>-1</sup> ] |       |        | $\Delta G$ [kJ mol <sup>-1</sup> ] |       |       |
|-------------------------------------------------|-----------------------------|-------|--------|------------------------------------|-------|-------|
|                                                 | gas phase                   | SMD   | PCM    | gas phase                          | SMD   | PCM   |
| <b>1</b>                                        | 130.25                      | 79.84 | 90.40  | 78.70                              | 42.69 | 52.65 |
| <b>2</b>                                        | 174.56                      | 94.32 | 112.97 | 139.68                             | 50.67 | 74.94 |
| Fe <sup>IV</sup> [cCCCC] <sub>trz</sub> O(MeCN) | 20.18                       | -     | -      | 8.25                               | -     | -     |
| Fe <sup>V</sup> [cCCCC] <sub>trz</sub> O(MeCN)  | 26.73                       | -     | -      | 18.20                              | -     | -     |

**Table S25**  $\Delta H$  and  $\Delta G$  of overall epoxidation reaction: products (epoxide + H<sub>2</sub>O), reactants (*cis*-cyclooctene + H<sub>2</sub>O<sub>2</sub>).

| $\Delta H$ [kJ mol <sup>-1</sup> ] |        |        | $\Delta G$ [kJ mol <sup>-1</sup> ] |        |        |
|------------------------------------|--------|--------|------------------------------------|--------|--------|
| gas phase                          | SMD    | PCM    | gas phase                          | SMD    | PCM    |
| -51.18                             | -50.73 | -52.46 | -48.52                             | -48.15 | -49.87 |

## 9. References

1. *APEX suite of crystallographic software*, APEX 3, Version 2019-11.0, Bruker AXS Inc.: Madison, Wisconsin, USA, 2019.
2. *SAINT*, Version 8.38A, Bruker AXS Inc.: Madison, Wisconsin, USA, 2017.
3. *SADABS*, Version 2016/2, Bruker AXS Inc.: Madison, Wisconsin, USA, 2016.
4. G. M. Sheldrick, *Acta Crystallographica Section C: Structural Chemistry*, 2015, **71**, 3-8.
5. C. B. Hübschle, G. M. Sheldrick and B. Dittrich, *J. Appl. Crystallogr.*, 2011, **44**, 1281-1284.
6. G. M. Sheldrick, *Acta Crystallographica Section A: Foundations and Advances*, 2015, **71**, 3-8.
7. A. J. Wilson, *International Tables for Crystallography*. Kluwer Academic Publishers: Dordrecht, The Netherlands, 1992; Vol. C.
8. C. F. Macrae, I. Sovago, S. J. Cottrell, P. T. Galek, P. McCabe, E. Pidcock, M. Platings, G. P. Shields, J. S. Stevens and M. Towler, *J. Appl. Crystallogr.*, 2020, **53**, 226-235.
9. A. Spek, *Acta Crystallogr., Sect. D: Biol. Crystallogr.*, 2009, **65**, 148-155.
10. A. Poater, F. Ragone, S. Giudice, C. Costabile, R. Dorta, S. P. Nolan and L. Cavallo, *Organometallics*, 2008, **27**, 2679-2681.
11. A. Poater, F. Ragone, R. Mariz, R. Dorta and L. Cavallo, *Chem. Eur. J.*, 2010, **16**, 14348-14353.
12. L. Falivene, Z. Cao, A. Petta, L. Serra, A. Poater, R. Oliva, V. Scarano and L. Cavallo, *Nature Chemistry*, 2019, **11**, 872-879.
13. E.-M. H. J. Esslinger, J. F. Schlagintweit, G. G. Zámbo, A. M. Imhof, R. M. Reich and F. E. Kühn, *Asian J. Org. Chem.*, 2021, **10**, 2654-2662.
14. M. J. Frisch, G. W. Trucks, H. B. Schlegel, G. E. Scuseria, M. A. Robb, J. R. Cheeseman, G. Scalmani, V. Barone, G. A. Petersson, H. Nakatsuji, X. Li, M. Caricato, A. V. Marenich, J. Bloino, B. G. Janesko, R. Gomperts, B. Mennucci, H. P. Hratchian, J. V. Ortiz, A. F. Izmaylov, J. L. Sonnenberg, Williams, F. Ding, F. Lipparini, F. Egidi, J. Goings, B. Peng, A. Petrone, T. Henderson, D. Ranasinghe, V. G. Zakrzewski, J. Gao, N. Rega, G. Zheng, W. Liang, M. Hada, M. Ehara, K. Toyota, R. Fukuda, J. Hasegawa, M. Ishida, T. Nakajima, Y. Honda, O. Kitao, H. Nakai, T. Vreven, K. Throssell, J. A. Montgomery Jr., J. E. Peralta, F. Ogliaro, M. J. Bearpark, J. J. Heyd, E. N. Brothers, K. N. Kudin, V. N. Staroverov, T. A. Keith, R. Kobayashi, J. Normand, K. Raghavachari, A. P. Rendell, J. C. Burant, S. S. Iyengar, J. Tomasi, M. Cossi, J. M. Millam, M. Klene, C. Adamo, R. Cammi, J. W. Ochterski, R. L. Martin, K. Morokuma, O. Farkas, J. B. Foresman and D. Fox, *Gaussian 16 Rev. B.01*, Wallingford, CT, 2016.
15. R. Dennington, T. A. Keith and J. M. Millam, *GaussView, version 6.0. 16*, Semichem Inc.: Shawnee Mission, KS, 2016.
16. A. V. Marenich, C. J. Cramer and D. G. Truhlar, *The Journal of Physical Chemistry B*, 2009, **113**, 6378-6396.
17. J. Tomasi, B. Mennucci and R. Cammi, *Chem. Rev.*, 2005, **105**, 2999-3094.
18. S.-C. Liu, X.-R. Zhu, D.-Y. Liu and D.-C. Fang, *Physical Chemistry Chemical Physics*, 2023, **25**, 913-931.
19. M. A. Bernd, F. Dyckhoff, B. J. Hofmann, A. D. Böth, J. F. Schlagintweit, J. Oberkofler, R. M. Reich and F. E. Kühn, *J. Catal.*, 2020, **391**, 548-561.
20. V. Dantignana, A. Company and M. Costas, *Israel Journal of Chemistry*, 2020, **60**, 1004-1018.
21. A. D. Vaz, D. F. McGinnity and M. J. Coon, *Proceedings of the National Academy of Sciences*, 1998, **95**, 3555-3560.
22. T. P. Schlachta, G. G. Zámbo, M. J. Sauer, I. Rüter, C. A. Hoefler, S. Demeshko, F. Meyer and F. E. Kühn, *J. Catal.*, 2023, **426**, 234-246.
